# Supplementary material for: Functions of 1,25-dihydroxy vitamin D3, vitamin D3 receptor and interleukin-22 involved in pathogenesis of gout arthritis through altering metabolic pattern and inflammatory responses
Source: PeerJ journal article supplement (doi:10.7717/peerj.12585), 2021-12-01
Supplement: rawa.zip [file correlation analysis.xlsx]

## Sheet: Sheet1
group item	groups	Serial NO.	name	1,25(OH)2VD3	IL-22	CRP	NCRP
3	HC	1	***	19.67	29.12	2.65	-0.1592
3	HC	2	***	15.04	87.9	1.27	-0.7348
3	HC	3	***	6.79	40.09	2.45	-0.2197
3	HC	4	***	28.79	53.31	0.46	-1.3474
3	HC	5	***	14.94	32.83	4.86	0.2811
3	HC	6	***	23.6	55.8	0.3	-1.8304
3	HC	7	***	11.14	78	1.65	-0.4289
3	HC	8	***	12.13	77.33	3.42	-0.0396
3	HC	9	***	71.53	99.86	0.85	-0.9622
3	HC	10	***	18.42	23.18	0.21	-2.3308
3	HC	11	***	30.74	221.15	1	-0.901
3	HC	12	***	17.37	31.25	0.5	-1.2126
3	HC	13	***	13.07	94.91	1.5	-0.5635
3	HC	14	***	18.65	120.04	3.65	0.0595
3	HC	15	***	19.66	130.41	0.4	-1.5124
3	HC	16	***	19.59	40.18	1.5	-0.5635
3	HC	17	***	18.99	39.41	2.15	-0.3435
3	HC	18	***	26.63	54.4	1.2	-0.843
3	HC	19	***	13.51	88.33	6.54	0.3646
3	HC	20	***	18.31	61.74	0.4	-1.5124
2	NAGA Patients	1	***	13.11	69.3	1.56	-0.4951
2	NAGA Patients	2	***	11.01	200.33
2	NAGA Patients	3	***	11.23	69.5	4.21	0.1592
2	NAGA Patients	4	***	26.02	241.78	2.85	-0.0793
2	NAGA Patients	5	***	23.39	162.06
2	NAGA Patients	7	***	16.75	125.1	1.45	-0.6838
2	NAGA Patients	8	***	17.39	102.66	5.21	0.3226
2	NAGA Patients	9	***	22.81	129.28	0.6	-1.0968
2	NAGA Patients	10	***	14.23	69.55	3.75	0.1192
2	NAGA Patients	12	***	18.59	124.59
2	NAGA Patients	13	***	14.31	89.24
2	NAGA Patients	14	***	7.87	57.58	2.23	-0.2811
2	NAGA Patients	15	***	15.15	46.69	1.46	-0.6346
2	NAGA Patients	16	***	7.6	40.65
2	NAGA Patients	17	***	21.7	121.36	3.58	0
2	NAGA Patients	18	***	34.46	66.53	4.55	0.1995
2	NAGA Patients	19	***	25.31	151.84	0.3	-1.8304
2	NAGA Patients	20	***	10.71	62.92	1.23	-0.7878
2	NAGA Patients	21	***	15.79	45.14
2	NAGA Patients	23	***	12.01	77.56	2.45	-0.2197
2	NAGA Patients	24	***	6.55	133.85	0.65	-1.0272
2	NAGA Patients	25	***	47.68	82.67	0.5	-1.2126
2	NAGA Patients	26	***	16.25	334.09	1.65	-0.4289
2	NAGA Patients	27	***	17.41	92.1	2.76	-0.1192
2	NAGA Patients	28	***	26.79	207.41
2	NAGA Patients	29	***	25.39	168.82	3.65	0.0595
2	NAGA Patients	30	***	6.86	59.11	2.15	-0.3435
2	NAGA Patients	31	***	16.93	117.75	4.65	0.2401
1	AGA Patients	1	***	17.58	105.4	21.47	0.901
1	AGA Patients	2	***	4.2	110.57
1	AGA Patients	4	***	16.27	107.32	26.38	1.255
1	AGA Patients	5	***	22.91	175.47
1	AGA Patients	6	***	6.71	55.03	14.26	0.6346
1	AGA Patients	7	***	10.98	73.17
1	AGA Patients	8	***	17.31	116.33
1	AGA Patients	9	***	8.6	143.61	12.66	0.4507
1	AGA Patients	10	***	11.48	51.57
1	AGA Patients	11	***	11.57	62.77	53.62	1.9483
1	AGA Patients	12	***	11.79	164.46	24.46	1.1722
1	AGA Patients	13	***	6.71	33.31	8.35	0.4073
1	AGA Patients	14	***	5.01	228.33	56.73	2.3308
1	AGA Patients	15	***	7.24	60.15	18.56	0.843
1	AGA Patients	16	***	9.25	202.53
1	AGA Patients	17	***	8.02	131.8	39.1	1.5777
1	AGA Patients	18	***	3.82	115.82
1	AGA Patients	19	***	4.86	129.73	21.54	0.9941
1	AGA Patients	20	***	10.03	116.61	16.57	0.7348
1	AGA Patients	21	***	15.95	118.82	15.42	0.6838
1	AGA Patients	22	***	11.56	186.75	12.69	0.5404
1	AGA Patients	23	***	8.42	159.05	43.48	1.7335
1	AGA Patients	24	***	13.59	63.43
1	AGA Patients	25	***	13.57	77.16	13.75	0.5868
1	AGA Patients	26	***	23.68	291.37	23.42	1.0968
1	AGA Patients	27	***	12.4	182.34	16.73	0.7878
1	AGA Patients	28	***	21.56	122.04	27.42	1.3474
1	AGA Patients	29	***	14.28	128.37	12.67	0.4951
1	AGA Patients	30	***	17.58	169.69	36.32	1.4529
1	AGA Patients	31	***	10.99	187.22	21.54	0.9941
