# Supplementary material for: Functions of 1,25-dihydroxy vitamin D3, vitamin D3 receptor and interleukin-22 involved in pathogenesis of gout arthritis through altering metabolic pattern and inflammatory responses
Source: PeerJ journal article supplement (doi:10.7717/peerj.12585), 2021-12-01
Supplement: rawa.zip [file ELISA and patient characteristics.xlsx]

## Sheet: Sheet1
	groups	name	Serial NO.	Age	Sex	BMI	disease duration	Course of disease (month)	1,25(OH)2VD3	IL-22	creatinine（umol/L）	UA（umol/L）	total cholesterol（mmol/L）	triglycerides（mmol/L）	blood sugar（mmol/L）	platelet（10*6/L）	ESR (mm/h)	CRP (mg/L)
3	HC	***	1	50	1	23.72	0		19.67	29.12	86.9	408	3.41	1.24	4.24	215	6	2.65
3	HC	***	2	54	1	23.3	0		15.04	87.9	82.8	328	3.95	1.11	5.29	309	14	1.27
3	HC	***	3	58	1	24.51	0		6.79	40.09	85.6	261	4.74	0.97	4.42	246	12	2.45
3	HC	***	4	59	1	23.88	0		28.79	53.31	75.9	304	4.18	4.92	4.66	190	13	0.46
3	HC	***	5	56	1	25.14	0		14.94	32.83	79.7	352	4.1	1.79	4.51	226	8	4.86
3	HC	***	6	42	1	25.25	0		23.6	55.8	85.3	365	4.28	1.46	5	260	10	0.3
3	HC	***	7	55	1	25.18	0		11.14	78	77.8	307	4.27	1.18	5.25	213	8	1.65
3	HC	***	8	55	1	23.05	0		12.13	77.33	82.8	450	3.73	2.63	5.25	218	11	3.42
3	HC	***	9	46	1	23.77	0		71.53	99.86	88.8	374	3.82	0.81	4.82	137	6	0.85
3	HC	***	10	52	1	23.72	0		18.42	23.18	69.6	246	4.16	0.82	6.07	176	11	0.21
3	HC	***	11	34	1	24.91	0		30.74	221.15	45.5	251	3.04	1.02	5.46	180	16	1
3	HC	***	12	46	1	24.21	0		17.37	31.25	78.7	333	3.66	0.77	4.73	238	5	0.5
3	HC	***	13	57	1	23.59	0		13.07	94.91	96.6	378	5.17	1.24	5.76	302	16	1.5
3	HC	***	14	56	1	21.22	0		18.65	120.04	101	383	4.33	0.88	4.36	140	13	3.65
3	HC	***	15	46	1	24.34	0		19.66	130.41	85	351	5.23	0.67	4.94	308	8	0.4
3	HC	***	16	50	1	23.44	0		19.59	40.18	53.3	187	5.16	1.65	4.8	271	10	1.5
3	HC	***	17	45	1	24.22	0		18.99	39.41	74.3	405	4.18	1.54	5.42	163	13	2.15
3	HC	***	18	53	1	28.28	0		26.63	54.4	68.7	415	5.16	1.21	5.88	292	15	1.2
3	HC	***	19	27	1	23.84	0		13.51	88.33	92.5	405	3.9	0.96	4.86	273	7	6.54
3	HC	***	20	45	2	25.08	0		18.31	61.74	83.6	326	4.21	1.53	4.88	186	14	0.4
2	NAGA Patients	***	1	48	1	32.78	1	120	13.11	69.3	117.9	406	4.4	3.1	5.66	252	12	1.56
2	NAGA Patients	***	2	27	1	34.78	0	36	11.01	200.33	81.9	426				290
2	NAGA Patients	***	3	30	1	26.23	0	12	11.23	69.5	80.6	366	5.42	3.64	5.19	366	8	4.21
2	NAGA Patients	***	4	32	1	23.14	0	12	26.02	241.78	79.7	562	4.88	2.2	4.93	301	12	2.85
2	NAGA Patients	***	5	37	2	26.26	0	12	23.39	162.06	71.5	384				229
2	NAGA Patients	***	7	32	1	36.61	0	48	16.75	125.1	100.7	598	4.01	0.9	4.91	252	18	1.45
2	NAGA Patients	***	8	45	1	31.98	1	12	17.39	102.66	141.1	213	4.58	2.09	6.19	183	14	5.21
2	NAGA Patients	***	9	34	1	22.06	0	36	22.81	129.28	75	680	6.51	2.9	5.27	226	12	0.6
2	NAGA Patients	***	10	47	1	24.66	0	120	14.23	69.55	81.5	316	4.22	4.83	5.61	221	6	3.75
2	NAGA Patients	***	12	38	1	28.37	0	12	18.59	124.59	81.5	259				261
2	NAGA Patients	***	13	28	1	20.76	0	48	14.31	89.24	81.2	335				169
2	NAGA Patients	***	14	51	1	25.95	0	24	7.87	57.58	97.5	600	6.89	2.44	5.88	86	13	2.23
2	NAGA Patients	***	15	42	1	27.04	0	12	15.15	46.69	72.2	304	3.28	1.67	5.21	240	15	1.46
2	NAGA Patients	***	16	67	1	20.98	1	240	7.6	40.65	121.7	287				217
2	NAGA Patients	***	17	31	1	34.6	0	48	21.7	121.36	81.9	244	4.17	3	5.02	339	16	3.58
2	NAGA Patients	***	18	20	1	29.32	0	1	34.46	66.53	81.2	315	4.97	1.95	4.95	260	22	4.55
2	NAGA Patients	***	19	28	1	31.56	0	36	25.31	151.84	87.2	482				272	20	0.3
2	NAGA Patients	***	20	24	1	23.44	0	1	10.71	62.92	96	514	3.71	3.52	4.8	242	18	1.23
2	NAGA Patients	***	21	33	1	30.61	0	94	15.79	45.14	85.9	361				235
2	NAGA Patients	***	23	34	1	25.1	1	36	12.01	77.56	105.7	610	4.11	1.56	6.43	331	15	2.45
2	NAGA Patients	***	24	37	1	22.72	0	2	6.55	133.85	146.5	330	3.72	2.51	5.47	145	6	0.65
2	NAGA Patients	***	25	29	1	32.53	0	1	47.68	82.67	105.1	228	4.02	1.83	5.08	356	14	0.5
2	NAGA Patients	***	26	31	1	20.76	0	84	16.25	334.09	87.8	577	3.67	1.03	5.01	184	12	1.65
2	NAGA Patients	***	27	66	1	27.68	1	12	17.41	92.1	88.1	208	5.65	1.9	4.99	432	10	2.76
2	NAGA Patients	***	28	27	1	29.56	0	2	26.79	207.41	97.8	452				254
2	NAGA Patients	***	29	46	1	28.02	0	24	25.39	168.82	71.2	362	4.64	3.42	6	214	6	3.65
2	NAGA Patients	***	30	35	1	23.99	0	84	6.86	59.11	91.3	648	5.13	1.8	5.63	256	14	2.15
2	NAGA Patients	***	31	28	1	25.47	0	5	16.93	117.75	82.5	669	3.39	0.75	4.83	199	22	4.65
1	AGA Patients	***	1	69	1	21.67	0	1	17.58	105.4	80	208	3.08	0.66	4.94	98	24	21.47
1	AGA Patients	***	2	44	1	31.07	0	36	4.2	110.57	103.1	261				241
1	AGA Patients	***	4	63	1	22.04	0	7	16.27	107.32	121.1	231	3.19	1.73	4.9	159	18	26.38
1	AGA Patients	***	5	38	1	27.61	0	12	22.91	175.47	113.5	167				255
1	AGA Patients	***	6	28	1	31.14	1	108	6.71	55.03	93.5	479	4.35	1.7	5.26	214	25	14.26
1	AGA Patients	***	7	23	1	33.21	0	36	10.98	73.17	89.1	687				268
1	AGA Patients	***	8	33	1	27.34	0	36	17.31	116.33	83.1	205				182
1	AGA Patients	***	9	32	1	27.78	0	12	8.6	143.61	112.6	653	5.18	1.42	5.54	176	23	12.66
1	AGA Patients	***	10	65	1	24.22	0	120	11.48	51.57	121.4	394				186
1	AGA Patients	***	11	66	1	27.68	1	0	11.57	62.77	75.3	409	3.91	0.95	7.49	352	16	53.62
1	AGA Patients	***	12	25	1	26.57	0	36	11.79	164.46	103.2	580	4.58	1.7	4.87	303	18	24.46
1	AGA Patients	***	13	30	1	24.11	0	12	6.71	33.31	90.9	491	5.4	1.19	5.3	253	14	8.35
1	AGA Patients	***	14	35	1	25.47	0	12	5.01	228.33	92.2	663	4.19	1.84	5.23	254	22	56.73
1	AGA Patients	***	15	49	1	27.68	0	15	7.24	60.15	76.2	488	3.58	1.92	5.19	196	32	18.56
1	AGA Patients	***	16	21	1	29.32	0	12	9.25	202.53	89.4	630				222
1	AGA Patients	***	17	56	1	25.39	0	3	8.02	131.8	144.6	410	4.24	0.78	4.85	181	18	39.1
1	AGA Patients	***	18	62	2	35.25	0	54	3.82	115.82	71.8	479				110
1	AGA Patients	***	19	37	1	25.06	0	1	4.86	129.73	77.8	322	3.12	2.04	4.83	276	18	21.54
1	AGA Patients	***	20	28	1	32.41	0	12	10.03	116.61	104.7	277	4.16	2.11	5.05	243	25	16.57
1	AGA Patients	***	21	56	2	24.22	0	48	15.95	118.82	147.4	518	5.36	4.32	6.27	152	24	15.42
1	AGA Patients	***	22	46	1	21.8	0	5	11.56	186.75	110.4	443	4.77	3.04	5.55	180	14	12.69
1	AGA Patients	***	23	66	1	26.37	1	24	8.42	159.05	195.2	618	5.12	1.96	9.2	134	16	43.48
1	AGA Patients	***	24	69	1	24.96	1	1	13.59	63.43	85.9	422				231
1	AGA Patients	***	25	26	1	26.88	0	1	13.57	77.16	91.6	321	4.09	2.33	4.93	251	20	13.75
1	AGA Patients	***	26	48	1	24.21	0	120	23.68	291.37	91.9	296	4.93	1.38	5.07	239	24	23.42
1	AGA Patients	***	27	47	1	21.48	0	38	12.4	182.34	118.9	555	4.24	0.77	5.86	165	8	16.73
1	AGA Patients	***	28	26	1	24.39	0	0	21.56	122.04	93.1	588				237		27.42
1	AGA Patients	***	29	38	1	29.76	0	60	14.28	128.37	74.3	542	6	3.26	6.69	377	18	12.67
1	AGA Patients	***	30	36	1	26.89	1	1	17.58	169.69	85.3	573	3.62	3.54	5.95	170	23	36.32
1	AGA Patients	***	31	28	1	22.86	0	12	10.99	187.22	84.2	489	3.26	2.64	5.46	260	24	21.54
