# Supplementary material for: Functions of 1,25-dihydroxy vitamin D3, vitamin D3 receptor and interleukin-22 involved in pathogenesis of gout arthritis through altering metabolic pattern and inflammatory responses
Source: PeerJ journal article supplement (doi:10.7717/peerj.12585), 2021-12-01
Supplement: rawa.zip [file ELISA.xlsx]

## Sheet: Sheet1
group item	groups	Serial NO.	name	1,25(OH)2VD3	IL-22
3	HC	1	***	19.67	29.12
3	HC	2	***	15.04	87.9
3	HC	3	***	6.79	40.09
3	HC	4	***	28.79	53.31
3	HC	5	***	14.94	32.83
3	HC	6	***	23.6	55.8
3	HC	7	***	11.14	78
3	HC	8	***	12.13	77.33
3	HC	9	***	71.53	99.86
3	HC	10	***	18.42	23.18
3	HC	11	***	30.74	221.15
3	HC	12	***	17.37	31.25
3	HC	13	***	13.07	94.91
3	HC	14	***	18.65	120.04
3	HC	15	***	19.66	130.41
3	HC	16	***	19.59	40.18
3	HC	17	***	18.99	39.41
3	HC	18	***	26.63	54.4
3	HC	19	***	13.51	88.33
3	HC	20	***	18.31	61.74
2	NAGA Patients	1	***	13.11	69.3
2	NAGA Patients	2	***	11.01	200.33
2	NAGA Patients	3	***	11.23	69.5
2	NAGA Patients	4	***	26.02	241.78
2	NAGA Patients	5	***	23.39	162.06
2	NAGA Patients	7	***	16.75	125.1
2	NAGA Patients	8	***	17.39	102.66
2	NAGA Patients	9	***	22.81	129.28
2	NAGA Patients	10	***	14.23	69.55
2	NAGA Patients	12	***	18.59	124.59
2	NAGA Patients	13	***	14.31	89.24
2	NAGA Patients	14	***	7.87	57.58
2	NAGA Patients	15	***	15.15	46.69
2	NAGA Patients	16	***	7.6	40.65
2	NAGA Patients	17	***	21.7	121.36
2	NAGA Patients	18	***	34.46	66.53
2	NAGA Patients	19	***	25.31	151.84
2	NAGA Patients	20	***	10.71	62.92
2	NAGA Patients	21	***	15.79	45.14
2	NAGA Patients	23	***	12.01	77.56
2	NAGA Patients	24	***	6.55	133.85
2	NAGA Patients	25	***	47.68	82.67
2	NAGA Patients	26	***	16.25	334.09
2	NAGA Patients	27	***	17.41	92.1
2	NAGA Patients	28	***	26.79	207.41
2	NAGA Patients	29	***	25.39	168.82
2	NAGA Patients	30	***	6.86	59.11
2	NAGA Patients	31	***	16.93	117.75
1	AGA Patients	1	***	17.58	105.4
1	AGA Patients	2	***	4.2	110.57
1	AGA Patients	4	***	16.27	107.32
1	AGA Patients	5	***	22.91	175.47
1	AGA Patients	6	***	6.71	55.03
1	AGA Patients	7	***	10.98	73.17
1	AGA Patients	8	***	17.31	116.33
1	AGA Patients	9	***	8.6	143.61
1	AGA Patients	10	***	11.48	51.57
1	AGA Patients	11	***	11.57	62.77
1	AGA Patients	12	***	11.79	164.46
1	AGA Patients	13	***	6.71	33.31
1	AGA Patients	14	***	5.01	228.33
1	AGA Patients	15	***	7.24	60.15
1	AGA Patients	16	***	9.25	202.53
1	AGA Patients	17	***	8.02	131.8
1	AGA Patients	18	***	3.82	115.82
1	AGA Patients	19	***	4.86	129.73
1	AGA Patients	20	***	10.03	116.61
1	AGA Patients	21	***	15.95	118.82
1	AGA Patients	22	***	11.56	186.75
1	AGA Patients	23	***	8.42	159.05
1	AGA Patients	24	***	13.59	63.43
1	AGA Patients	25	***	13.57	77.16
1	AGA Patients	26	***	23.68	291.37
1	AGA Patients	27	***	12.4	182.34
1	AGA Patients	28	***	21.56	122.04
1	AGA Patients	29	***	14.28	128.37
1	AGA Patients	30	***	17.58	169.69
1	AGA Patients	31	***	10.99	187.22
