# Supplementary material for: Functions of 1,25-dihydroxy vitamin D3, vitamin D3 receptor and interleukin-22 involved in pathogenesis of gout arthritis through altering metabolic pattern and inflammatory responses
Source: PeerJ journal article supplement (doi:10.7717/peerj.12585), 2021-12-01
Supplement: rawa.zip [file GO analysis.xlsx]

## Sheet: Cellular Component
#term ID	term description	observed gene count	background gene count	false discovery rate	matching proteins in your network (IDs)	matching proteins in your network (labels)
GO:0016592	mediator complex	20	34	7.32e-40	ENSP00000237380,ENSP00000251871,ENSP00000258648,ENSP00000263205,ENSP00000265350,ENSP00000290663,ENSP00000292035,ENSP00000297347,ENSP00000300651,ENSP00000314343,ENSP00000323720,ENSP00000325612,ENSP00000337340,ENSP00000362948,ENSP00000363193,ENSP00000377686,ENSP00000380888,ENSP00000428982,ENSP00000481920,ENSP00000482438	CCNC,MED1,MED12,MED13,MED14,MED15,MED16,MED17,MED18,MED19,MED20,MED22,MED24,MED27,MED28,MED29,MED30,MED4,MED6,MED8
GO:0005654	nucleoplasm	36	3446	9.19e-20	ENSP00000237380,ENSP00000251871,ENSP00000258648,ENSP00000262367,ENSP00000263205,ENSP00000263253,ENSP00000264657,ENSP00000265350,ENSP00000269305,ENSP00000290663,ENSP00000292035,ENSP00000297347,ENSP00000300651,ENSP00000314343,ENSP00000323720,ENSP00000325612,ENSP00000326767,ENSP00000332973,ENSP00000337340,ENSP00000346389,ENSP00000354394,ENSP00000357047,ENSP00000361066,ENSP00000362948,ENSP00000363193…	CCNC,CITED2,CREB1,CREBBP,EP300,HIF1A,MED1,MED12,MED13,MED14,MED15,MED16,MED17,MED18,MED19,MED20,MED22,MED23,MED24,MED25,MED27,MED28,MED29,MED30,MED4,MED6,MED8,MEF2A,NCOA1,NCOA3,RELA,SMAD3,STAT1,STAT3,TP53,VDR
GO:0044451	nucleoplasm part	24	1073	4.1e-18	ENSP00000237380,ENSP00000251871,ENSP00000258648,ENSP00000262367,ENSP00000263205,ENSP00000263253,ENSP00000265350,ENSP00000269305,ENSP00000290663,ENSP00000292035,ENSP00000297347,ENSP00000300651,ENSP00000314343,ENSP00000323720,ENSP00000325612,ENSP00000337340,ENSP00000362948,ENSP00000363193,ENSP00000377686,ENSP00000380888,ENSP00000428982,ENSP00000437955,ENSP00000481920,ENSP00000482438	CCNC,CREBBP,EP300,HIF1A,MED1,MED12,MED13,MED14,MED15,MED16,MED17,MED18,MED19,MED20,MED22,MED24,MED27,MED28,MED29,MED30,MED4,MED6,MED8,TP53
GO:0032991	protein-containing complex	38	4792	8.39e-18	ENSP00000237380,ENSP00000251871,ENSP00000258648,ENSP00000262367,ENSP00000263205,ENSP00000263253,ENSP00000264657,ENSP00000265350,ENSP00000269305,ENSP00000287727,ENSP00000290200,ENSP00000290663,ENSP00000292035,ENSP00000297347,ENSP00000300651,ENSP00000314343,ENSP00000323720,ENSP00000325612,ENSP00000326767,ENSP00000332973,ENSP00000337340,ENSP00000346389,ENSP00000354394,ENSP00000357047,ENSP00000361066…	CCNC,CITED2,CREB1,CREBBP,EP300,HIF1A,IL10RB,MED1,MED12,MED13,MED14,MED15,MED16,MED17,MED18,MED19,MED20,MED22,MED23,MED24,MED25,MED27,MED28,MED29,MED30,MED4,MED6,MED8,MEF2A,NCOA1,NCOA3,RELA,SMAD3,STAT1,STAT3,TP53,VDR,ZFYVE9
GO:0005667	transcription factor complex	16	326	1.08e-16	ENSP00000251871,ENSP00000258648,ENSP00000263253,ENSP00000264657,ENSP00000292035,ENSP00000323720,ENSP00000326767,ENSP00000332973,ENSP00000346389,ENSP00000357047,ENSP00000362948,ENSP00000384273,ENSP00000387699,ENSP00000437955,ENSP00000447173,ENSP00000481920	CREB1,EP300,HIF1A,MED14,MED17,MED18,MED23,MED25,MED27,MED4,MED6,MEF2A,RELA,SMAD3,STAT3,VDR
GO:0005634	nucleus	37	6892	2.27e-11	ENSP00000237380,ENSP00000251871,ENSP00000258648,ENSP00000262367,ENSP00000263205,ENSP00000263253,ENSP00000264657,ENSP00000265350,ENSP00000269305,ENSP00000290663,ENSP00000292035,ENSP00000297347,ENSP00000300651,ENSP00000314343,ENSP00000323720,ENSP00000325612,ENSP00000326767,ENSP00000332973,ENSP00000337340,ENSP00000346389,ENSP00000354394,ENSP00000357047,ENSP00000357907,ENSP00000361066,ENSP00000362948…	CCNC,CDK19,CITED2,CREB1,CREBBP,EP300,HIF1A,MED1,MED12,MED13,MED14,MED15,MED16,MED17,MED18,MED19,MED20,MED22,MED23,MED24,MED25,MED27,MED28,MED29,MED30,MED4,MED6,MED8,MEF2A,NCOA1,NCOA3,RELA,SMAD3,STAT1,STAT3,TP53,VDR
GO:0044798	nuclear transcription factor complex	10	166	3.31e-11	ENSP00000258648,ENSP00000264657,ENSP00000323720,ENSP00000326767,ENSP00000332973,ENSP00000362948,ENSP00000387699,ENSP00000437955,ENSP00000447173,ENSP00000481920	CREB1,HIF1A,MED14,MED18,MED25,MED4,MED6,SMAD3,STAT3,VDR
GO:0090575	RNA polymerase II transcription factor complex	9	139	2.28e-10	ENSP00000258648,ENSP00000264657,ENSP00000323720,ENSP00000332973,ENSP00000362948,ENSP00000387699,ENSP00000437955,ENSP00000447173,ENSP00000481920	CREB1,HIF1A,MED14,MED18,MED4,MED6,SMAD3,STAT3,VDR
GO:0000790	nuclear chromatin	11	333	1.03e-09	ENSP00000262367,ENSP00000264657,ENSP00000269305,ENSP00000332973,ENSP00000346389,ENSP00000354394,ENSP00000361066,ENSP00000384273,ENSP00000385216,ENSP00000387699,ENSP00000444198	CITED2,CREB1,CREBBP,MEF2A,NCOA1,NCOA3,RELA,SMAD3,STAT1,STAT3,TP53
GO:0000785	chromatin	12	489	3.29e-09	ENSP00000262367,ENSP00000264657,ENSP00000269305,ENSP00000300651,ENSP00000332973,ENSP00000346389,ENSP00000354394,ENSP00000361066,ENSP00000384273,ENSP00000385216,ENSP00000387699,ENSP00000444198	CITED2,CREB1,CREBBP,MED1,MEF2A,NCOA1,NCOA3,RELA,SMAD3,STAT1,STAT3,TP53
GO:0070847	core mediator complex	4	6	3.12e-08	ENSP00000258648,ENSP00000323720,ENSP00000362948,ENSP00000481920	MED14,MED18,MED4,MED6
GO:0044446	intracellular organelle part	37	8882	6.78e-08	ENSP00000237380,ENSP00000251871,ENSP00000258648,ENSP00000262367,ENSP00000263205,ENSP00000263253,ENSP00000264657,ENSP00000265350,ENSP00000269305,ENSP00000287727,ENSP00000290663,ENSP00000292035,ENSP00000297347,ENSP00000300651,ENSP00000314343,ENSP00000323720,ENSP00000325612,ENSP00000326767,ENSP00000332973,ENSP00000337340,ENSP00000346389,ENSP00000354394,ENSP00000357047,ENSP00000361066,ENSP00000362948…	CCNC,CITED2,CREB1,CREBBP,EP300,HIF1A,MED1,MED12,MED13,MED14,MED15,MED16,MED17,MED18,MED19,MED20,MED22,MED23,MED24,MED25,MED27,MED28,MED29,MED30,MED4,MED6,MED8,MEF2A,NCOA1,NCOA3,RELA,SMAD3,STAT1,STAT3,TP53,VDR,ZFYVE9
GO:1990234	transferase complex	12	727	1.85e-07	ENSP00000258648,ENSP00000262367,ENSP00000263253,ENSP00000265350,ENSP00000292035,ENSP00000297347,ENSP00000300651,ENSP00000323720,ENSP00000362948,ENSP00000363193,ENSP00000428982,ENSP00000481920	CCNC,CREBBP,EP300,MED1,MED12,MED14,MED18,MED20,MED27,MED30,MED4,MED6
GO:0005694	chromosome	13	950	3.62e-07	ENSP00000262367,ENSP00000263253,ENSP00000264657,ENSP00000269305,ENSP00000300651,ENSP00000332973,ENSP00000346389,ENSP00000354394,ENSP00000361066,ENSP00000384273,ENSP00000385216,ENSP00000387699,ENSP00000444198	CITED2,CREB1,CREBBP,EP300,MED1,MEF2A,NCOA1,NCOA3,RELA,SMAD3,STAT1,STAT3,TP53
GO:0043231	intracellular membrane-bounded organelle	38	10365	1.14e-06	ENSP00000237380,ENSP00000251871,ENSP00000258648,ENSP00000262367,ENSP00000263205,ENSP00000263253,ENSP00000264657,ENSP00000265350,ENSP00000269305,ENSP00000287727,ENSP00000290663,ENSP00000292035,ENSP00000297347,ENSP00000300651,ENSP00000314343,ENSP00000323720,ENSP00000325612,ENSP00000326767,ENSP00000332973,ENSP00000337340,ENSP00000346389,ENSP00000354394,ENSP00000357047,ENSP00000357907,ENSP00000361066…	CCNC,CDK19,CITED2,CREB1,CREBBP,EP300,HIF1A,MED1,MED12,MED13,MED14,MED15,MED16,MED17,MED18,MED19,MED20,MED22,MED23,MED24,MED25,MED27,MED28,MED29,MED30,MED4,MED6,MED8,MEF2A,NCOA1,NCOA3,RELA,SMAD3,STAT1,STAT3,TP53,VDR,ZFYVE9
GO:0016591	RNA polymerase II, holoenzyme	4	103	0.00037	ENSP00000258648,ENSP00000323720,ENSP00000362948,ENSP00000481920	MED14,MED18,MED4,MED6
GO:0061695	transferase complex, transferring phosphorus-containing groups	5	239	0.00074	ENSP00000258648,ENSP00000323720,ENSP00000362948,ENSP00000428982,ENSP00000481920	CCNC,MED14,MED18,MED4,MED6
GO:0000151	ubiquitin ligase complex	5	285	0.0014	ENSP00000265350,ENSP00000292035,ENSP00000297347,ENSP00000300651,ENSP00000363193	MED1,MED12,MED20,MED27,MED30
GO:0044424	intracellular part	39	13996	0.0026	ENSP00000237380,ENSP00000251871,ENSP00000258648,ENSP00000262367,ENSP00000263205,ENSP00000263253,ENSP00000264657,ENSP00000265350,ENSP00000269305,ENSP00000287727,ENSP00000290663,ENSP00000292035,ENSP00000296980,ENSP00000297347,ENSP00000300651,ENSP00000314343,ENSP00000323720,ENSP00000325612,ENSP00000326767,ENSP00000332973,ENSP00000337340,ENSP00000346389,ENSP00000354394,ENSP00000357047,ENSP00000357907…	CCNC,CDK19,CITED2,CREB1,CREBBP,EP300,HIF1A,IL22RA2,MED1,MED12,MED13,MED14,MED15,MED16,MED17,MED18,MED19,MED20,MED22,MED23,MED24,MED25,MED27,MED28,MED29,MED30,MED4,MED6,MED8,MEF2A,NCOA1,NCOA3,RELA,SMAD3,STAT1,STAT3,TP53,VDR,ZFYVE9
GO:0044464	cell part	41	16244	0.0139	ENSP00000237380,ENSP00000251871,ENSP00000258648,ENSP00000262367,ENSP00000263205,ENSP00000263253,ENSP00000264657,ENSP00000265350,ENSP00000269305,ENSP00000270800,ENSP00000287727,ENSP00000290200,ENSP00000290663,ENSP00000292035,ENSP00000296980,ENSP00000297347,ENSP00000300651,ENSP00000314343,ENSP00000323720,ENSP00000325612,ENSP00000326767,ENSP00000332973,ENSP00000337340,ENSP00000346389,ENSP00000354394…	CCNC,CDK19,CITED2,CREB1,CREBBP,EP300,HIF1A,IL10RB,IL22RA1,IL22RA2,MED1,MED12,MED13,MED14,MED15,MED16,MED17,MED18,MED19,MED20,MED22,MED23,MED24,MED25,MED27,MED28,MED29,MED30,MED4,MED6,MED8,MEF2A,NCOA1,NCOA3,RELA,SMAD3,STAT1,STAT3,TP53,VDR,ZFYVE9
GO:0000123	histone acetyltransferase complex	2	76	0.0411	ENSP00000262367,ENSP00000263253	CREBBP,EP300

## Sheet: Molecular Function
#term ID	term description	observed gene count	background gene count	false discovery rate	matching proteins in your network (IDs)	matching proteins in your network (labels)
GO:0061629	RNA polymerase II-specific DNA-binding transcription factor binding	21	257	6.61e-26	ENSP00000251871,ENSP00000258648,ENSP00000262367,ENSP00000263253,ENSP00000264657,ENSP00000297347,ENSP00000300651,ENSP00000323720,ENSP00000325612,ENSP00000326767,ENSP00000332973,ENSP00000354394,ENSP00000361066,ENSP00000363193,ENSP00000377686,ENSP00000380888,ENSP00000384273,ENSP00000385216,ENSP00000387699,ENSP00000437955,ENSP00000447173	CREB1,CREBBP,EP300,HIF1A,MED1,MED12,MED13,MED14,MED16,MED17,MED24,MED25,MED30,MED4,NCOA1,NCOA3,RELA,SMAD3,STAT1,STAT3,VDR
GO:0140297	DNA-binding transcription factor binding	22	327	6.95e-26	ENSP00000251871,ENSP00000258648,ENSP00000262367,ENSP00000263253,ENSP00000264657,ENSP00000297347,ENSP00000300651,ENSP00000323720,ENSP00000325612,ENSP00000326767,ENSP00000332973,ENSP00000346389,ENSP00000354394,ENSP00000361066,ENSP00000363193,ENSP00000377686,ENSP00000380888,ENSP00000384273,ENSP00000385216,ENSP00000387699,ENSP00000437955,ENSP00000447173	CREB1,CREBBP,EP300,HIF1A,MED1,MED12,MED13,MED14,MED16,MED17,MED24,MED25,MED30,MED4,MEF2A,NCOA1,NCOA3,RELA,SMAD3,STAT1,STAT3,VDR
GO:0008134	transcription factor binding	25	610	4.11e-25	ENSP00000251871,ENSP00000258648,ENSP00000262367,ENSP00000263253,ENSP00000264657,ENSP00000269305,ENSP00000297347,ENSP00000300651,ENSP00000323720,ENSP00000325612,ENSP00000326767,ENSP00000332973,ENSP00000337340,ENSP00000346389,ENSP00000354394,ENSP00000361066,ENSP00000363193,ENSP00000377686,ENSP00000380888,ENSP00000384273,ENSP00000385216,ENSP00000387699,ENSP00000437955,ENSP00000447173,ENSP00000481920	CREB1,CREBBP,EP300,HIF1A,MED1,MED12,MED13,MED14,MED16,MED17,MED19,MED24,MED25,MED30,MED4,MED6,MEF2A,NCOA1,NCOA3,RELA,SMAD3,STAT1,STAT3,TP53,VDR
GO:0035257	nuclear hormone receptor binding	18	149	4.11e-25	ENSP00000251871,ENSP00000258648,ENSP00000263253,ENSP00000264657,ENSP00000297347,ENSP00000300651,ENSP00000323720,ENSP00000325612,ENSP00000326767,ENSP00000332973,ENSP00000354394,ENSP00000361066,ENSP00000363193,ENSP00000377686,ENSP00000380888,ENSP00000385216,ENSP00000437955,ENSP00000447173	EP300,HIF1A,MED1,MED12,MED13,MED14,MED16,MED17,MED24,MED25,MED30,MED4,NCOA1,NCOA3,SMAD3,STAT1,STAT3,VDR
GO:0003713	transcription coactivator activity	19	307	1.1e-21	ENSP00000251871,ENSP00000258648,ENSP00000262367,ENSP00000263253,ENSP00000265350,ENSP00000292035,ENSP00000297347,ENSP00000300651,ENSP00000323720,ENSP00000325612,ENSP00000346389,ENSP00000357047,ENSP00000361066,ENSP00000363193,ENSP00000377686,ENSP00000380888,ENSP00000385216,ENSP00000444198,ENSP00000481920	CITED2,CREBBP,EP300,MED1,MED12,MED13,MED14,MED16,MED17,MED20,MED23,MED24,MED27,MED30,MED4,MED6,MEF2A,NCOA1,NCOA3
GO:0003712	transcription coregulator activity	20	534	6.94e-19	ENSP00000251871,ENSP00000258648,ENSP00000262367,ENSP00000263253,ENSP00000265350,ENSP00000292035,ENSP00000297347,ENSP00000300651,ENSP00000323720,ENSP00000325612,ENSP00000346389,ENSP00000357047,ENSP00000361066,ENSP00000363193,ENSP00000377686,ENSP00000380888,ENSP00000385216,ENSP00000387699,ENSP00000444198,ENSP00000481920	CITED2,CREB1,CREBBP,EP300,MED1,MED12,MED13,MED14,MED16,MED17,MED20,MED23,MED24,MED27,MED30,MED4,MED6,MEF2A,NCOA1,NCOA3
GO:0042809	vitamin D receptor binding	9	15	1.36e-17	ENSP00000251871,ENSP00000258648,ENSP00000297347,ENSP00000300651,ENSP00000323720,ENSP00000325612,ENSP00000363193,ENSP00000377686,ENSP00000380888	MED1,MED12,MED13,MED14,MED16,MED17,MED24,MED30,MED4
GO:0030374	nuclear receptor transcription coactivator activity	11	52	1.48e-17	ENSP00000251871,ENSP00000258648,ENSP00000297347,ENSP00000300651,ENSP00000323720,ENSP00000325612,ENSP00000361066,ENSP00000363193,ENSP00000377686,ENSP00000380888,ENSP00000385216	MED1,MED12,MED13,MED14,MED16,MED17,MED24,MED30,MED4,NCOA1,NCOA3
GO:0046966	thyroid hormone receptor binding	9	28	1.01e-15	ENSP00000251871,ENSP00000258648,ENSP00000297347,ENSP00000300651,ENSP00000325612,ENSP00000361066,ENSP00000363193,ENSP00000377686,ENSP00000380888	MED1,MED12,MED13,MED16,MED17,MED24,MED30,MED4,NCOA3
GO:0140110	transcription regulator activity	27	2069	2.1e-15	ENSP00000251871,ENSP00000258648,ENSP00000262367,ENSP00000263253,ENSP00000264657,ENSP00000265350,ENSP00000269305,ENSP00000292035,ENSP00000297347,ENSP00000300651,ENSP00000323720,ENSP00000325612,ENSP00000332973,ENSP00000346389,ENSP00000354394,ENSP00000357047,ENSP00000361066,ENSP00000363193,ENSP00000377686,ENSP00000380888,ENSP00000384273,ENSP00000385216,ENSP00000387699,ENSP00000437955,ENSP00000444198…	CITED2,CREB1,CREBBP,EP300,HIF1A,MED1,MED12,MED13,MED14,MED16,MED17,MED20,MED23,MED24,MED27,MED30,MED4,MED6,MEF2A,NCOA1,NCOA3,RELA,SMAD3,STAT1,STAT3,TP53,VDR
GO:0005102	signaling receptor binding	20	1513	1.17e-10	ENSP00000251871,ENSP00000258648,ENSP00000263253,ENSP00000264657,ENSP00000269305,ENSP00000297347,ENSP00000300651,ENSP00000323720,ENSP00000325612,ENSP00000326767,ENSP00000332973,ENSP00000354394,ENSP00000361066,ENSP00000363193,ENSP00000377686,ENSP00000380888,ENSP00000385216,ENSP00000437955,ENSP00000442424,ENSP00000447173	EP300,HIF1A,IL22,MED1,MED12,MED13,MED14,MED16,MED17,MED24,MED25,MED30,MED4,NCOA1,NCOA3,SMAD3,STAT1,STAT3,TP53,VDR
GO:0035035	histone acetyltransferase binding	6	27	1.22e-09	ENSP00000269305,ENSP00000346389,ENSP00000354394,ENSP00000387699,ENSP00000437955,ENSP00000444198	CITED2,CREB1,HIF1A,MEF2A,STAT1,TP53
GO:0016922	nuclear receptor binding	8	111	2.32e-09	ENSP00000263253,ENSP00000264657,ENSP00000300651,ENSP00000326767,ENSP00000332973,ENSP00000361066,ENSP00000385216,ENSP00000447173	EP300,MED1,MED25,NCOA1,NCOA3,SMAD3,STAT3,VDR
GO:0003682	chromatin binding	12	501	7.35e-09	ENSP00000262367,ENSP00000263253,ENSP00000264657,ENSP00000269305,ENSP00000300651,ENSP00000332973,ENSP00000346389,ENSP00000354394,ENSP00000363193,ENSP00000384273,ENSP00000385216,ENSP00000444198	CITED2,CREBBP,EP300,MED1,MED12,MEF2A,NCOA1,RELA,SMAD3,STAT1,STAT3,TP53
GO:0000987	proximal promoter sequence-specific DNA binding	11	475	5.83e-08	ENSP00000262367,ENSP00000263253,ENSP00000264657,ENSP00000269305,ENSP00000300651,ENSP00000332973,ENSP00000346389,ENSP00000354394,ENSP00000384273,ENSP00000387699,ENSP00000437955	CREB1,CREBBP,EP300,HIF1A,MED1,MEF2A,RELA,SMAD3,STAT1,STAT3,TP53
GO:0001085	RNA polymerase II transcription factor binding	7	121	1.26e-07	ENSP00000262367,ENSP00000263253,ENSP00000264657,ENSP00000269305,ENSP00000332973,ENSP00000346389,ENSP00000387699	CREB1,CREBBP,EP300,MEF2A,SMAD3,STAT3,TP53
GO:0033613	activating transcription factor binding	6	69	1.5e-07	ENSP00000262367,ENSP00000263253,ENSP00000332973,ENSP00000346389,ENSP00000384273,ENSP00000387699	CREB1,CREBBP,EP300,MEF2A,RELA,SMAD3
GO:0000976	transcription regulatory region sequence-specific DNA binding	12	710	2.69e-07	ENSP00000262367,ENSP00000263253,ENSP00000264657,ENSP00000269305,ENSP00000300651,ENSP00000332973,ENSP00000346389,ENSP00000354394,ENSP00000363193,ENSP00000384273,ENSP00000387699,ENSP00000437955	CREB1,CREBBP,EP300,HIF1A,MED1,MED12,MEF2A,RELA,SMAD3,STAT1,STAT3,TP53
GO:0005515	protein binding	32	6605	2.69e-07	ENSP00000237380,ENSP00000251871,ENSP00000258648,ENSP00000262367,ENSP00000263253,ENSP00000264657,ENSP00000269305,ENSP00000270800,ENSP00000287727,ENSP00000296980,ENSP00000297347,ENSP00000300651,ENSP00000323720,ENSP00000325612,ENSP00000326767,ENSP00000332973,ENSP00000337340,ENSP00000346389,ENSP00000354394,ENSP00000357907,ENSP00000361066,ENSP00000363193,ENSP00000377686,ENSP00000380888,ENSP00000384273…	CDK19,CITED2,CREB1,CREBBP,EP300,HIF1A,IL22,IL22RA1,IL22RA2,MED1,MED12,MED13,MED14,MED16,MED17,MED19,MED24,MED25,MED28,MED30,MED4,MED6,MEF2A,NCOA1,NCOA3,RELA,SMAD3,STAT1,STAT3,TP53,VDR,ZFYVE9
GO:0060089	molecular transducer activity	16	1483	3.32e-07	ENSP00000251871,ENSP00000258648,ENSP00000264657,ENSP00000270800,ENSP00000290200,ENSP00000296980,ENSP00000297347,ENSP00000300651,ENSP00000323720,ENSP00000325612,ENSP00000332973,ENSP00000357907,ENSP00000363193,ENSP00000377686,ENSP00000380888,ENSP00000447173	CDK19,IL10RB,IL22RA1,IL22RA2,MED1,MED12,MED13,MED14,MED16,MED17,MED24,MED30,MED4,SMAD3,STAT3,VDR
GO:0000978	RNA polymerase II proximal promoter sequence-specific DNA binding	10	457	4.03e-07	ENSP00000263253,ENSP00000264657,ENSP00000269305,ENSP00000300651,ENSP00000332973,ENSP00000346389,ENSP00000354394,ENSP00000384273,ENSP00000387699,ENSP00000437955	CREB1,EP300,HIF1A,MED1,MEF2A,RELA,SMAD3,STAT1,STAT3,TP53
GO:0035258	steroid hormone receptor binding	6	90	5.02e-07	ENSP00000263253,ENSP00000264657,ENSP00000300651,ENSP00000332973,ENSP00000361066,ENSP00000385216	EP300,MED1,NCOA1,NCOA3,SMAD3,STAT3
GO:0000977	RNA polymerase II regulatory region sequence-specific DNA binding	11	647	8.35e-07	ENSP00000263253,ENSP00000264657,ENSP00000269305,ENSP00000300651,ENSP00000332973,ENSP00000346389,ENSP00000354394,ENSP00000363193,ENSP00000384273,ENSP00000387699,ENSP00000437955	CREB1,EP300,HIF1A,MED1,MED12,MEF2A,RELA,SMAD3,STAT1,STAT3,TP53
GO:0043565	sequence-specific DNA binding	13	1047	1.38e-06	ENSP00000262367,ENSP00000263253,ENSP00000264657,ENSP00000269305,ENSP00000300651,ENSP00000332973,ENSP00000346389,ENSP00000354394,ENSP00000363193,ENSP00000384273,ENSP00000387699,ENSP00000437955,ENSP00000447173	CREB1,CREBBP,EP300,HIF1A,MED1,MED12,MEF2A,RELA,SMAD3,STAT1,STAT3,TP53,VDR
GO:0004402	histone acetyltransferase activity	4	24	2.6e-06	ENSP00000262367,ENSP00000263253,ENSP00000361066,ENSP00000385216	CREBBP,EP300,NCOA1,NCOA3
GO:0038023	signaling receptor activity	14	1429	6.32e-06	ENSP00000251871,ENSP00000258648,ENSP00000264657,ENSP00000270800,ENSP00000290200,ENSP00000296980,ENSP00000297347,ENSP00000300651,ENSP00000323720,ENSP00000325612,ENSP00000363193,ENSP00000377686,ENSP00000380888,ENSP00000447173	IL10RB,IL22RA1,IL22RA2,MED1,MED12,MED13,MED14,MED16,MED17,MED24,MED30,MED4,STAT3,VDR
GO:0031490	chromatin DNA binding	5	87	9.71e-06	ENSP00000263253,ENSP00000264657,ENSP00000300651,ENSP00000332973,ENSP00000384273	EP300,MED1,RELA,SMAD3,STAT3
GO:0003700	DNA-binding transcription factor activity	15	1749	1.14e-05	ENSP00000262367,ENSP00000263253,ENSP00000264657,ENSP00000269305,ENSP00000300651,ENSP00000332973,ENSP00000346389,ENSP00000354394,ENSP00000361066,ENSP00000384273,ENSP00000385216,ENSP00000387699,ENSP00000437955,ENSP00000444198,ENSP00000447173	CITED2,CREB1,CREBBP,EP300,HIF1A,MED1,MEF2A,NCOA1,NCOA3,RELA,SMAD3,STAT1,STAT3,TP53,VDR
GO:0001102	RNA polymerase II activating transcription factor binding	4	39	1.28e-05	ENSP00000262367,ENSP00000263253,ENSP00000332973,ENSP00000387699	CREB1,CREBBP,EP300,SMAD3
GO:0001228	DNA-binding transcription activator activity, RNA polymerase II-specific	8	408	1.43e-05	ENSP00000263253,ENSP00000264657,ENSP00000269305,ENSP00000332973,ENSP00000346389,ENSP00000384273,ENSP00000387699,ENSP00000437955	CREB1,EP300,HIF1A,MEF2A,RELA,SMAD3,STAT3,TP53
GO:0035326	enhancer binding	5	101	1.71e-05	ENSP00000269305,ENSP00000332973,ENSP00000363193,ENSP00000384273,ENSP00000387699	CREB1,MED12,RELA,SMAD3,TP53
GO:0000981	DNA-binding transcription factor activity, RNA polymerase II-specific	14	1631	2.42e-05	ENSP00000262367,ENSP00000263253,ENSP00000264657,ENSP00000269305,ENSP00000300651,ENSP00000332973,ENSP00000346389,ENSP00000354394,ENSP00000361066,ENSP00000384273,ENSP00000385216,ENSP00000387699,ENSP00000437955,ENSP00000447173	CREB1,CREBBP,EP300,HIF1A,MED1,MEF2A,NCOA1,NCOA3,RELA,SMAD3,STAT1,STAT3,TP53,VDR
GO:0016251	RNA polymerase II general transcription initiation factor activity	3	14	3.18e-05	ENSP00000332973,ENSP00000354394,ENSP00000384273	RELA,SMAD3,STAT1
GO:0000980	RNA polymerase II distal enhancer sequence-specific DNA binding	4	67	7.62e-05	ENSP00000269305,ENSP00000363193,ENSP00000384273,ENSP00000387699	CREB1,MED12,RELA,TP53
GO:0002039	p53 binding	4	73	0.0001	ENSP00000262367,ENSP00000263253,ENSP00000269305,ENSP00000437955	CREBBP,EP300,HIF1A,TP53
GO:0042974	retinoic acid receptor binding	3	23	0.00011	ENSP00000300651,ENSP00000326767,ENSP00000447173	MED1,MED25,VDR
GO:0030375	thyroid hormone receptor coactivator activity	2	4	0.00029	ENSP00000300651,ENSP00000325612	MED1,MED16
GO:0001046	core promoter sequence-specific DNA binding	3	37	0.00037	ENSP00000269305,ENSP00000300651,ENSP00000354394	MED1,STAT1,TP53
GO:0047485	protein N-terminus binding	4	109	0.00042	ENSP00000269305,ENSP00000361066,ENSP00000384273,ENSP00000385216	NCOA1,NCOA3,RELA,TP53
GO:0042826	histone deacetylase binding	4	110	0.00043	ENSP00000269305,ENSP00000346389,ENSP00000384273,ENSP00000437955	HIF1A,MEF2A,RELA,TP53
GO:0061630	ubiquitin protein ligase activity	5	215	0.00043	ENSP00000265350,ENSP00000292035,ENSP00000297347,ENSP00000300651,ENSP00000363193	MED1,MED12,MED20,MED27,MED30
GO:0019904	protein domain specific binding	8	706	0.00046	ENSP00000269305,ENSP00000287727,ENSP00000300651,ENSP00000361066,ENSP00000363193,ENSP00000384273,ENSP00000437955,ENSP00000444198	CITED2,HIF1A,MED1,MED12,NCOA3,RELA,TP53,ZFYVE9
GO:0050693	LBD domain binding	2	6	0.00048	ENSP00000300651,ENSP00000444198	CITED2,MED1
GO:0050681	androgen receptor binding	3	43	0.0005	ENSP00000263253,ENSP00000361066,ENSP00000385216	EP300,NCOA1,NCOA3
GO:0031730	CCR5 chemokine receptor binding	2	7	0.00059	ENSP00000264657,ENSP00000354394	STAT1,STAT3
GO:0070491	repressing transcription factor binding	3	60	0.0012	ENSP00000264657,ENSP00000354394,ENSP00000384273	RELA,STAT1,STAT3
GO:0003677	DNA binding	14	2457	0.0014	ENSP00000262367,ENSP00000263253,ENSP00000264657,ENSP00000269305,ENSP00000300651,ENSP00000332973,ENSP00000346389,ENSP00000354394,ENSP00000363193,ENSP00000384273,ENSP00000385216,ENSP00000387699,ENSP00000437955,ENSP00000447173	CREB1,CREBBP,EP300,HIF1A,MED1,MED12,MEF2A,NCOA1,RELA,SMAD3,STAT1,STAT3,TP53,VDR
GO:0003684	damaged DNA binding	3	64	0.0014	ENSP00000262367,ENSP00000263253,ENSP00000269305	CREBBP,EP300,TP53
GO:0035259	glucocorticoid receptor binding	2	13	0.0016	ENSP00000264657,ENSP00000332973	SMAD3,STAT3
GO:0019902	phosphatase binding	4	168	0.0017	ENSP00000264657,ENSP00000269305,ENSP00000332973,ENSP00000354394	SMAD3,STAT1,STAT3,TP53
GO:0046965	retinoid X receptor binding	2	15	0.002	ENSP00000326767,ENSP00000447173	MED25,VDR
GO:0044389	ubiquitin-like protein ligase binding	5	325	0.0022	ENSP00000269305,ENSP00000332973,ENSP00000354394,ENSP00000384273,ENSP00000437955	HIF1A,RELA,SMAD3,STAT1,TP53
GO:0008013	beta-catenin binding	3	82	0.0026	ENSP00000263253,ENSP00000332973,ENSP00000363193	EP300,MED12,SMAD3
GO:0046982	protein heterodimerization activity	6	519	0.0026	ENSP00000269305,ENSP00000332973,ENSP00000346389,ENSP00000361066,ENSP00000384273,ENSP00000437955	HIF1A,MEF2A,NCOA3,RELA,SMAD3,TP53
GO:0000979	RNA polymerase II core promoter sequence-specific DNA binding	2	21	0.0034	ENSP00000300651,ENSP00000354394	MED1,STAT1
GO:0046983	protein dimerization activity	9	1301	0.0046	ENSP00000264657,ENSP00000269305,ENSP00000332973,ENSP00000346389,ENSP00000354394,ENSP00000361066,ENSP00000384273,ENSP00000385216,ENSP00000437955	HIF1A,MEF2A,NCOA1,NCOA3,RELA,SMAD3,STAT1,STAT3,TP53
GO:0019901	protein kinase binding	6	599	0.005	ENSP00000264657,ENSP00000269305,ENSP00000332973,ENSP00000346389,ENSP00000384273,ENSP00000437955	HIF1A,MEF2A,RELA,SMAD3,STAT3,TP53
GO:0019899	enzyme binding	12	2197	0.0051	ENSP00000264657,ENSP00000269305,ENSP00000332973,ENSP00000346389,ENSP00000354394,ENSP00000357907,ENSP00000361066,ENSP00000384273,ENSP00000385216,ENSP00000387699,ENSP00000437955,ENSP00000444198	CDK19,CITED2,CREB1,HIF1A,MEF2A,NCOA1,NCOA3,RELA,SMAD3,STAT1,STAT3,TP53
GO:0043425	bHLH transcription factor binding	2	29	0.0057	ENSP00000262367,ENSP00000332973	CREBBP,SMAD3
GO:0051721	protein phosphatase 2A binding	2	29	0.0057	ENSP00000269305,ENSP00000354394	STAT1,TP53
GO:0019903	protein phosphatase binding	3	123	0.0069	ENSP00000264657,ENSP00000269305,ENSP00000354394	STAT1,STAT3,TP53
GO:0097718	disordered domain specific binding	2	33	0.007	ENSP00000269305,ENSP00000361066	NCOA3,TP53
GO:0005126	cytokine receptor binding	4	272	0.0077	ENSP00000264657,ENSP00000332973,ENSP00000354394,ENSP00000442424	IL22,SMAD3,STAT1,STAT3
GO:0001099	basal RNA polymerase II transcription machinery binding	2	39	0.0092	ENSP00000269305,ENSP00000361066	NCOA3,TP53
GO:0030331	estrogen receptor binding	2	42	0.0102	ENSP00000300651,ENSP00000385216	MED1,NCOA1
GO:1990841	promoter-specific chromatin binding	2	43	0.0106	ENSP00000269305,ENSP00000354394	STAT1,TP53
GO:0031625	ubiquitin protein ligase binding	4	311	0.0113	ENSP00000269305,ENSP00000332973,ENSP00000384273,ENSP00000437955	HIF1A,RELA,SMAD3,TP53
GO:0004879	nuclear receptor activity	2	50	0.0137	ENSP00000264657,ENSP00000447173	STAT3,VDR
GO:0016740	transferase activity	11	2250	0.0163	ENSP00000262367,ENSP00000263253,ENSP00000265350,ENSP00000292035,ENSP00000297347,ENSP00000300651,ENSP00000357907,ENSP00000361066,ENSP00000363193,ENSP00000385216,ENSP00000428982	CCNC,CDK19,CREBBP,EP300,MED1,MED12,MED20,MED27,MED30,NCOA1,NCOA3
GO:0046332	SMAD binding	2	73	0.0264	ENSP00000332973,ENSP00000346389	MEF2A,SMAD3
GO:0004896	cytokine receptor activity	2	91	0.0393	ENSP00000270800,ENSP00000296980	IL22RA1,IL22RA2
GO:0019955	cytokine binding	2	99	0.0454	ENSP00000270800,ENSP00000296980	IL22RA1,IL22RA2

## Sheet: Biological Process
#term ID	term description	observed gene count	background gene count	false discovery rate	matching proteins in your network (IDs)	matching proteins in your network (labels)
GO:0006367	transcription initiation from RNA polymerase II promoter	20	162	6.35e-27	ENSP00000251871,ENSP00000258648,ENSP00000262367,ENSP00000263205,ENSP00000265350,ENSP00000269305,ENSP00000290663,ENSP00000292035,ENSP00000297347,ENSP00000300651,ENSP00000323720,ENSP00000325612,ENSP00000326767,ENSP00000357047,ENSP00000363193,ENSP00000377686,ENSP00000380888,ENSP00000428982,ENSP00000447173,ENSP00000481920	CCNC,CREBBP,MED1,MED12,MED13,MED14,MED15,MED16,MED17,MED20,MED23,MED24,MED25,MED27,MED30,MED4,MED6,MED8,TP53,VDR
GO:0006366	transcription by RNA polymerase II	28	784	3.52e-26	ENSP00000251871,ENSP00000258648,ENSP00000262367,ENSP00000263205,ENSP00000263253,ENSP00000264657,ENSP00000265350,ENSP00000269305,ENSP00000290663,ENSP00000292035,ENSP00000297347,ENSP00000300651,ENSP00000323720,ENSP00000325612,ENSP00000326767,ENSP00000332973,ENSP00000346389,ENSP00000357047,ENSP00000362948,ENSP00000363193,ENSP00000377686,ENSP00000380888,ENSP00000384273,ENSP00000387699,ENSP00000428982…	CCNC,CREB1,CREBBP,EP300,HIF1A,MED1,MED12,MED13,MED14,MED15,MED16,MED17,MED18,MED20,MED23,MED24,MED25,MED27,MED30,MED4,MED6,MED8,MEF2A,RELA,SMAD3,STAT3,TP53,VDR
GO:0006351	transcription, DNA-templated	36	2569	2.47e-23	ENSP00000237380,ENSP00000251871,ENSP00000258648,ENSP00000262367,ENSP00000263205,ENSP00000263253,ENSP00000264657,ENSP00000265350,ENSP00000269305,ENSP00000290663,ENSP00000292035,ENSP00000297347,ENSP00000300651,ENSP00000314343,ENSP00000323720,ENSP00000325612,ENSP00000326767,ENSP00000332973,ENSP00000337340,ENSP00000346389,ENSP00000354394,ENSP00000357047,ENSP00000361066,ENSP00000362948,ENSP00000363193…	CCNC,CITED2,CREB1,CREBBP,EP300,HIF1A,MED1,MED12,MED13,MED14,MED15,MED16,MED17,MED18,MED19,MED20,MED22,MED23,MED24,MED25,MED27,MED28,MED29,MED30,MED4,MED6,MED8,MEF2A,NCOA1,NCOA3,RELA,SMAD3,STAT1,STAT3,TP53,VDR
GO:1903508	positive regulation of nucleic acid-templated transcription	30	1520	7.88e-22	ENSP00000251871,ENSP00000258648,ENSP00000262367,ENSP00000263253,ENSP00000264657,ENSP00000265350,ENSP00000269305,ENSP00000292035,ENSP00000297347,ENSP00000300651,ENSP00000323720,ENSP00000325612,ENSP00000326767,ENSP00000332973,ENSP00000337340,ENSP00000346389,ENSP00000354394,ENSP00000357047,ENSP00000361066,ENSP00000363193,ENSP00000377686,ENSP00000380888,ENSP00000384273,ENSP00000385216,ENSP00000387699…	CCNC,CITED2,CREB1,CREBBP,EP300,HIF1A,MED1,MED12,MED13,MED14,MED16,MED17,MED19,MED20,MED23,MED24,MED25,MED27,MED30,MED4,MED6,MEF2A,NCOA1,NCOA3,RELA,SMAD3,STAT1,STAT3,TP53,VDR
GO:0051254	positive regulation of RNA metabolic process	30	1596	2.49e-21	ENSP00000251871,ENSP00000258648,ENSP00000262367,ENSP00000263253,ENSP00000264657,ENSP00000265350,ENSP00000269305,ENSP00000292035,ENSP00000297347,ENSP00000300651,ENSP00000323720,ENSP00000325612,ENSP00000326767,ENSP00000332973,ENSP00000337340,ENSP00000346389,ENSP00000354394,ENSP00000357047,ENSP00000361066,ENSP00000363193,ENSP00000377686,ENSP00000380888,ENSP00000384273,ENSP00000385216,ENSP00000387699…	CCNC,CITED2,CREB1,CREBBP,EP300,HIF1A,MED1,MED12,MED13,MED14,MED16,MED17,MED19,MED20,MED23,MED24,MED25,MED27,MED30,MED4,MED6,MEF2A,NCOA1,NCOA3,RELA,SMAD3,STAT1,STAT3,TP53,VDR
GO:0016070	RNA metabolic process	36	3430	1.33e-19	ENSP00000237380,ENSP00000251871,ENSP00000258648,ENSP00000262367,ENSP00000263205,ENSP00000263253,ENSP00000264657,ENSP00000265350,ENSP00000269305,ENSP00000290663,ENSP00000292035,ENSP00000297347,ENSP00000300651,ENSP00000314343,ENSP00000323720,ENSP00000325612,ENSP00000326767,ENSP00000332973,ENSP00000337340,ENSP00000346389,ENSP00000354394,ENSP00000357047,ENSP00000361066,ENSP00000362948,ENSP00000363193…	CCNC,CITED2,CREB1,CREBBP,EP300,HIF1A,MED1,MED12,MED13,MED14,MED15,MED16,MED17,MED18,MED19,MED20,MED22,MED23,MED24,MED25,MED27,MED28,MED29,MED30,MED4,MED6,MED8,MEF2A,NCOA1,NCOA3,RELA,SMAD3,STAT1,STAT3,TP53,VDR
GO:0045893	positive regulation of transcription, DNA-templated	27	1435	8.25e-19	ENSP00000251871,ENSP00000258648,ENSP00000262367,ENSP00000263253,ENSP00000264657,ENSP00000269305,ENSP00000297347,ENSP00000300651,ENSP00000323720,ENSP00000325612,ENSP00000326767,ENSP00000332973,ENSP00000337340,ENSP00000346389,ENSP00000354394,ENSP00000361066,ENSP00000363193,ENSP00000377686,ENSP00000380888,ENSP00000384273,ENSP00000385216,ENSP00000387699,ENSP00000428982,ENSP00000437955,ENSP00000444198…	CCNC,CITED2,CREB1,CREBBP,EP300,HIF1A,MED1,MED12,MED13,MED14,MED16,MED17,MED19,MED24,MED25,MED30,MED4,MED6,MEF2A,NCOA1,NCOA3,RELA,SMAD3,STAT1,STAT3,TP53,VDR
GO:0006355	regulation of transcription, DNA-templated	36	3661	9.34e-19	ENSP00000237380,ENSP00000251871,ENSP00000258648,ENSP00000262367,ENSP00000263205,ENSP00000263253,ENSP00000264657,ENSP00000265350,ENSP00000269305,ENSP00000290663,ENSP00000292035,ENSP00000297347,ENSP00000300651,ENSP00000314343,ENSP00000323720,ENSP00000325612,ENSP00000326767,ENSP00000332973,ENSP00000337340,ENSP00000346389,ENSP00000354394,ENSP00000357047,ENSP00000361066,ENSP00000362948,ENSP00000363193…	CCNC,CITED2,CREB1,CREBBP,EP300,HIF1A,MED1,MED12,MED13,MED14,MED15,MED16,MED17,MED18,MED19,MED20,MED22,MED23,MED24,MED25,MED27,MED28,MED29,MED30,MED4,MED6,MED8,MEF2A,NCOA1,NCOA3,RELA,SMAD3,STAT1,STAT3,TP53,VDR
GO:0006357	regulation of transcription by RNA polymerase II	32	2633	4.03e-18	ENSP00000251871,ENSP00000258648,ENSP00000262367,ENSP00000263205,ENSP00000263253,ENSP00000264657,ENSP00000265350,ENSP00000269305,ENSP00000290663,ENSP00000292035,ENSP00000300651,ENSP00000323720,ENSP00000325612,ENSP00000326767,ENSP00000332973,ENSP00000337340,ENSP00000346389,ENSP00000354394,ENSP00000357047,ENSP00000361066,ENSP00000362948,ENSP00000363193,ENSP00000380888,ENSP00000384273,ENSP00000385216…	CCNC,CITED2,CREB1,CREBBP,EP300,HIF1A,MED1,MED12,MED13,MED14,MED15,MED16,MED17,MED18,MED19,MED20,MED22,MED23,MED25,MED27,MED4,MED6,MED8,MEF2A,NCOA1,NCOA3,RELA,SMAD3,STAT1,STAT3,TP53,VDR
GO:0051252	regulation of RNA metabolic process	36	3890	6.2e-18	ENSP00000237380,ENSP00000251871,ENSP00000258648,ENSP00000262367,ENSP00000263205,ENSP00000263253,ENSP00000264657,ENSP00000265350,ENSP00000269305,ENSP00000290663,ENSP00000292035,ENSP00000297347,ENSP00000300651,ENSP00000314343,ENSP00000323720,ENSP00000325612,ENSP00000326767,ENSP00000332973,ENSP00000337340,ENSP00000346389,ENSP00000354394,ENSP00000357047,ENSP00000361066,ENSP00000362948,ENSP00000363193…	CCNC,CITED2,CREB1,CREBBP,EP300,HIF1A,MED1,MED12,MED13,MED14,MED15,MED16,MED17,MED18,MED19,MED20,MED22,MED23,MED24,MED25,MED27,MED28,MED29,MED30,MED4,MED6,MED8,MEF2A,NCOA1,NCOA3,RELA,SMAD3,STAT1,STAT3,TP53,VDR
GO:0030521	androgen receptor signaling pathway	11	46	1.14e-17	ENSP00000251871,ENSP00000258648,ENSP00000297347,ENSP00000300651,ENSP00000323720,ENSP00000325612,ENSP00000361066,ENSP00000363193,ENSP00000377686,ENSP00000380888,ENSP00000385216	MED1,MED12,MED13,MED14,MED16,MED17,MED24,MED30,MED4,NCOA1,NCOA3
GO:0030522	intracellular receptor signaling pathway	14	173	7.4e-17	ENSP00000251871,ENSP00000258648,ENSP00000264657,ENSP00000297347,ENSP00000300651,ENSP00000323720,ENSP00000325612,ENSP00000361066,ENSP00000363193,ENSP00000377686,ENSP00000380888,ENSP00000384273,ENSP00000385216,ENSP00000447173	MED1,MED12,MED13,MED14,MED16,MED17,MED24,MED30,MED4,NCOA1,NCOA3,RELA,STAT3,VDR
GO:0045944	positive regulation of transcription by RNA polymerase II	23	1104	1.96e-16	ENSP00000251871,ENSP00000262367,ENSP00000263253,ENSP00000264657,ENSP00000269305,ENSP00000300651,ENSP00000323720,ENSP00000326767,ENSP00000332973,ENSP00000337340,ENSP00000346389,ENSP00000354394,ENSP00000361066,ENSP00000363193,ENSP00000380888,ENSP00000384273,ENSP00000385216,ENSP00000387699,ENSP00000428982,ENSP00000437955,ENSP00000444198,ENSP00000447173,ENSP00000481920	CCNC,CITED2,CREB1,CREBBP,EP300,HIF1A,MED1,MED12,MED13,MED14,MED17,MED19,MED25,MED6,MEF2A,NCOA1,NCOA3,RELA,SMAD3,STAT1,STAT3,TP53,VDR
GO:0043401	steroid hormone mediated signaling pathway	12	131	5.27e-15	ENSP00000251871,ENSP00000258648,ENSP00000297347,ENSP00000300651,ENSP00000323720,ENSP00000325612,ENSP00000361066,ENSP00000363193,ENSP00000377686,ENSP00000380888,ENSP00000385216,ENSP00000447173	MED1,MED12,MED13,MED14,MED16,MED17,MED24,MED30,MED4,NCOA1,NCOA3,VDR
GO:0070887	cellular response to chemical stimulus	29	2672	1.5e-14	ENSP00000251871,ENSP00000258648,ENSP00000262367,ENSP00000263253,ENSP00000264657,ENSP00000269305,ENSP00000270800,ENSP00000287727,ENSP00000290200,ENSP00000296980,ENSP00000297347,ENSP00000300651,ENSP00000323720,ENSP00000325612,ENSP00000332973,ENSP00000346389,ENSP00000354394,ENSP00000357907,ENSP00000361066,ENSP00000363193,ENSP00000377686,ENSP00000380888,ENSP00000384273,ENSP00000385216,ENSP00000387699…	CDK19,CITED2,CREB1,CREBBP,EP300,HIF1A,IL10RB,IL22,IL22RA1,IL22RA2,MED1,MED12,MED13,MED14,MED16,MED17,MED24,MED30,MED4,MEF2A,NCOA1,NCOA3,RELA,SMAD3,STAT1,STAT3,TP53,VDR,ZFYVE9
GO:0048545	response to steroid hormone	14	324	1.86e-13	ENSP00000251871,ENSP00000258648,ENSP00000297347,ENSP00000300651,ENSP00000323720,ENSP00000325612,ENSP00000361066,ENSP00000363193,ENSP00000377686,ENSP00000380888,ENSP00000384273,ENSP00000385216,ENSP00000442424,ENSP00000447173	IL22,MED1,MED12,MED13,MED14,MED16,MED17,MED24,MED30,MED4,NCOA1,NCOA3,RELA,VDR
GO:0051171	regulation of nitrogen compound metabolic process	37	5827	1.94e-13	ENSP00000237380,ENSP00000251871,ENSP00000258648,ENSP00000262367,ENSP00000263205,ENSP00000263253,ENSP00000264657,ENSP00000265350,ENSP00000269305,ENSP00000290663,ENSP00000292035,ENSP00000296980,ENSP00000297347,ENSP00000300651,ENSP00000314343,ENSP00000323720,ENSP00000325612,ENSP00000326767,ENSP00000332973,ENSP00000337340,ENSP00000346389,ENSP00000354394,ENSP00000357047,ENSP00000361066,ENSP00000362948…	CCNC,CITED2,CREB1,CREBBP,EP300,HIF1A,IL22RA2,MED1,MED12,MED13,MED14,MED15,MED16,MED17,MED18,MED19,MED20,MED22,MED23,MED24,MED25,MED27,MED28,MED29,MED30,MED4,MED6,MED8,MEF2A,NCOA1,NCOA3,RELA,SMAD3,STAT1,STAT3,TP53,VDR
GO:0071310	cellular response to organic substance	26	2219	2.61e-13	ENSP00000251871,ENSP00000258648,ENSP00000263253,ENSP00000264657,ENSP00000269305,ENSP00000270800,ENSP00000287727,ENSP00000290200,ENSP00000296980,ENSP00000297347,ENSP00000300651,ENSP00000323720,ENSP00000325612,ENSP00000332973,ENSP00000354394,ENSP00000357907,ENSP00000361066,ENSP00000363193,ENSP00000377686,ENSP00000380888,ENSP00000384273,ENSP00000385216,ENSP00000387699,ENSP00000437955,ENSP00000442424…	CDK19,CREB1,EP300,HIF1A,IL10RB,IL22,IL22RA1,IL22RA2,MED1,MED12,MED13,MED14,MED16,MED17,MED24,MED30,MED4,NCOA1,NCOA3,RELA,SMAD3,STAT1,STAT3,TP53,VDR,ZFYVE9
GO:0080090	regulation of primary metabolic process	37	5982	4.52e-13	ENSP00000237380,ENSP00000251871,ENSP00000258648,ENSP00000262367,ENSP00000263205,ENSP00000263253,ENSP00000264657,ENSP00000265350,ENSP00000269305,ENSP00000290663,ENSP00000292035,ENSP00000296980,ENSP00000297347,ENSP00000300651,ENSP00000314343,ENSP00000323720,ENSP00000325612,ENSP00000326767,ENSP00000332973,ENSP00000337340,ENSP00000346389,ENSP00000354394,ENSP00000357047,ENSP00000361066,ENSP00000362948…	CCNC,CITED2,CREB1,CREBBP,EP300,HIF1A,IL22RA2,MED1,MED12,MED13,MED14,MED15,MED16,MED17,MED18,MED19,MED20,MED22,MED23,MED24,MED25,MED27,MED28,MED29,MED30,MED4,MED6,MED8,MEF2A,NCOA1,NCOA3,RELA,SMAD3,STAT1,STAT3,TP53,VDR
GO:0060255	regulation of macromolecule metabolic process	37	6072	7.47e-13	ENSP00000237380,ENSP00000251871,ENSP00000258648,ENSP00000262367,ENSP00000263205,ENSP00000263253,ENSP00000264657,ENSP00000265350,ENSP00000269305,ENSP00000290663,ENSP00000292035,ENSP00000296980,ENSP00000297347,ENSP00000300651,ENSP00000314343,ENSP00000323720,ENSP00000325612,ENSP00000326767,ENSP00000332973,ENSP00000337340,ENSP00000346389,ENSP00000354394,ENSP00000357047,ENSP00000361066,ENSP00000362948…	CCNC,CITED2,CREB1,CREBBP,EP300,HIF1A,IL22RA2,MED1,MED12,MED13,MED14,MED15,MED16,MED17,MED18,MED19,MED20,MED22,MED23,MED24,MED25,MED27,MED28,MED29,MED30,MED4,MED6,MED8,MEF2A,NCOA1,NCOA3,RELA,SMAD3,STAT1,STAT3,TP53,VDR
GO:0031323	regulation of cellular metabolic process	37	6082	7.78e-13	ENSP00000237380,ENSP00000251871,ENSP00000258648,ENSP00000262367,ENSP00000263205,ENSP00000263253,ENSP00000264657,ENSP00000265350,ENSP00000269305,ENSP00000290663,ENSP00000292035,ENSP00000296980,ENSP00000297347,ENSP00000300651,ENSP00000314343,ENSP00000323720,ENSP00000325612,ENSP00000326767,ENSP00000332973,ENSP00000337340,ENSP00000346389,ENSP00000354394,ENSP00000357047,ENSP00000361066,ENSP00000362948…	CCNC,CITED2,CREB1,CREBBP,EP300,HIF1A,IL22RA2,MED1,MED12,MED13,MED14,MED15,MED16,MED17,MED18,MED19,MED20,MED22,MED23,MED24,MED25,MED27,MED28,MED29,MED30,MED4,MED6,MED8,MEF2A,NCOA1,NCOA3,RELA,SMAD3,STAT1,STAT3,TP53,VDR
GO:0032870	cellular response to hormone stimulus	16	585	1.2e-12	ENSP00000251871,ENSP00000258648,ENSP00000264657,ENSP00000297347,ENSP00000300651,ENSP00000323720,ENSP00000325612,ENSP00000354394,ENSP00000361066,ENSP00000363193,ENSP00000377686,ENSP00000380888,ENSP00000384273,ENSP00000385216,ENSP00000387699,ENSP00000447173	CREB1,MED1,MED12,MED13,MED14,MED16,MED17,MED24,MED30,MED4,NCOA1,NCOA3,RELA,STAT1,STAT3,VDR
GO:0071396	cellular response to lipid	15	486	1.64e-12	ENSP00000251871,ENSP00000258648,ENSP00000297347,ENSP00000300651,ENSP00000323720,ENSP00000325612,ENSP00000357907,ENSP00000361066,ENSP00000363193,ENSP00000377686,ENSP00000380888,ENSP00000384273,ENSP00000385216,ENSP00000387699,ENSP00000447173	CDK19,CREB1,MED1,MED12,MED13,MED14,MED16,MED17,MED24,MED30,MED4,NCOA1,NCOA3,RELA,VDR
GO:0071407	cellular response to organic cyclic compound	15	505	2.77e-12	ENSP00000251871,ENSP00000258648,ENSP00000264657,ENSP00000297347,ENSP00000300651,ENSP00000323720,ENSP00000325612,ENSP00000332973,ENSP00000354394,ENSP00000361066,ENSP00000363193,ENSP00000377686,ENSP00000380888,ENSP00000385216,ENSP00000447173	MED1,MED12,MED13,MED14,MED16,MED17,MED24,MED30,MED4,NCOA1,NCOA3,SMAD3,STAT1,STAT3,VDR
GO:0044260	cellular macromolecule metabolic process	37	6413	4.58e-12	ENSP00000237380,ENSP00000251871,ENSP00000258648,ENSP00000262367,ENSP00000263205,ENSP00000263253,ENSP00000264657,ENSP00000265350,ENSP00000269305,ENSP00000290663,ENSP00000292035,ENSP00000297347,ENSP00000300651,ENSP00000314343,ENSP00000323720,ENSP00000325612,ENSP00000326767,ENSP00000332973,ENSP00000337340,ENSP00000346389,ENSP00000354394,ENSP00000357047,ENSP00000357907,ENSP00000361066,ENSP00000362948…	CCNC,CDK19,CITED2,CREB1,CREBBP,EP300,HIF1A,MED1,MED12,MED13,MED14,MED15,MED16,MED17,MED18,MED19,MED20,MED22,MED23,MED24,MED25,MED27,MED28,MED29,MED30,MED4,MED6,MED8,MEF2A,NCOA1,NCOA3,RELA,SMAD3,STAT1,STAT3,TP53,VDR
GO:0071495	cellular response to endogenous stimulus	19	1106	7.97e-12	ENSP00000251871,ENSP00000258648,ENSP00000264657,ENSP00000269305,ENSP00000287727,ENSP00000297347,ENSP00000300651,ENSP00000323720,ENSP00000325612,ENSP00000332973,ENSP00000354394,ENSP00000361066,ENSP00000363193,ENSP00000377686,ENSP00000380888,ENSP00000384273,ENSP00000385216,ENSP00000387699,ENSP00000447173	CREB1,MED1,MED12,MED13,MED14,MED16,MED17,MED24,MED30,MED4,NCOA1,NCOA3,RELA,SMAD3,STAT1,STAT3,TP53,VDR,ZFYVE9
GO:0033993	response to lipid	17	825	1.26e-11	ENSP00000251871,ENSP00000258648,ENSP00000264657,ENSP00000297347,ENSP00000300651,ENSP00000323720,ENSP00000325612,ENSP00000357907,ENSP00000361066,ENSP00000363193,ENSP00000377686,ENSP00000380888,ENSP00000384273,ENSP00000385216,ENSP00000387699,ENSP00000442424,ENSP00000447173	CDK19,CREB1,IL22,MED1,MED12,MED13,MED14,MED16,MED17,MED24,MED30,MED4,NCOA1,NCOA3,RELA,STAT3,VDR
GO:0009725	response to hormone	17	854	2.14e-11	ENSP00000251871,ENSP00000258648,ENSP00000264657,ENSP00000297347,ENSP00000300651,ENSP00000323720,ENSP00000325612,ENSP00000354394,ENSP00000361066,ENSP00000363193,ENSP00000377686,ENSP00000380888,ENSP00000384273,ENSP00000385216,ENSP00000387699,ENSP00000442424,ENSP00000447173	CREB1,IL22,MED1,MED12,MED13,MED14,MED16,MED17,MED24,MED30,MED4,NCOA1,NCOA3,RELA,STAT1,STAT3,VDR
GO:0009719	response to endogenous stimulus	20	1353	2.19e-11	ENSP00000251871,ENSP00000258648,ENSP00000264657,ENSP00000269305,ENSP00000287727,ENSP00000297347,ENSP00000300651,ENSP00000323720,ENSP00000325612,ENSP00000332973,ENSP00000354394,ENSP00000361066,ENSP00000363193,ENSP00000377686,ENSP00000380888,ENSP00000384273,ENSP00000385216,ENSP00000387699,ENSP00000442424,ENSP00000447173	CREB1,IL22,MED1,MED12,MED13,MED14,MED16,MED17,MED24,MED30,MED4,NCOA1,NCOA3,RELA,SMAD3,STAT1,STAT3,TP53,VDR,ZFYVE9
GO:0014070	response to organic cyclic compound	17	873	2.94e-11	ENSP00000251871,ENSP00000258648,ENSP00000264657,ENSP00000297347,ENSP00000300651,ENSP00000323720,ENSP00000325612,ENSP00000332973,ENSP00000354394,ENSP00000361066,ENSP00000363193,ENSP00000377686,ENSP00000380888,ENSP00000384273,ENSP00000385216,ENSP00000442424,ENSP00000447173	IL22,MED1,MED12,MED13,MED14,MED16,MED17,MED24,MED30,MED4,NCOA1,NCOA3,RELA,SMAD3,STAT1,STAT3,VDR
GO:0043170	macromolecule metabolic process	38	7453	5.63e-11	ENSP00000237380,ENSP00000251871,ENSP00000258648,ENSP00000262367,ENSP00000263205,ENSP00000263253,ENSP00000264657,ENSP00000265350,ENSP00000269305,ENSP00000287727,ENSP00000290663,ENSP00000292035,ENSP00000297347,ENSP00000300651,ENSP00000314343,ENSP00000323720,ENSP00000325612,ENSP00000326767,ENSP00000332973,ENSP00000337340,ENSP00000346389,ENSP00000354394,ENSP00000357047,ENSP00000357907,ENSP00000361066…	CCNC,CDK19,CITED2,CREB1,CREBBP,EP300,HIF1A,MED1,MED12,MED13,MED14,MED15,MED16,MED17,MED18,MED19,MED20,MED22,MED23,MED24,MED25,MED27,MED28,MED29,MED30,MED4,MED6,MED8,MEF2A,NCOA1,NCOA3,RELA,SMAD3,STAT1,STAT3,TP53,VDR,ZFYVE9
GO:0050794	regulation of cellular process	42	10484	1.1e-10	ENSP00000237380,ENSP00000251871,ENSP00000258648,ENSP00000262367,ENSP00000263205,ENSP00000263253,ENSP00000264657,ENSP00000265350,ENSP00000269305,ENSP00000270800,ENSP00000287727,ENSP00000290200,ENSP00000290663,ENSP00000292035,ENSP00000296980,ENSP00000297347,ENSP00000300651,ENSP00000314343,ENSP00000323720,ENSP00000325612,ENSP00000326767,ENSP00000332973,ENSP00000337340,ENSP00000346389,ENSP00000354394…	CCNC,CDK19,CITED2,CREB1,CREBBP,EP300,HIF1A,IL10RB,IL22,IL22RA1,IL22RA2,MED1,MED12,MED13,MED14,MED15,MED16,MED17,MED18,MED19,MED20,MED22,MED23,MED24,MED25,MED27,MED28,MED29,MED30,MED4,MED6,MED8,MEF2A,NCOA1,NCOA3,RELA,SMAD3,STAT1,STAT3,TP53,VDR,ZFYVE9
GO:0048522	positive regulation of cellular process	31	4898	1.21e-09	ENSP00000251871,ENSP00000258648,ENSP00000262367,ENSP00000263253,ENSP00000264657,ENSP00000265350,ENSP00000269305,ENSP00000292035,ENSP00000297347,ENSP00000300651,ENSP00000323720,ENSP00000325612,ENSP00000326767,ENSP00000332973,ENSP00000337340,ENSP00000346389,ENSP00000354394,ENSP00000357047,ENSP00000357907,ENSP00000361066,ENSP00000363193,ENSP00000377686,ENSP00000380888,ENSP00000384273,ENSP00000385216…	CCNC,CDK19,CITED2,CREB1,CREBBP,EP300,HIF1A,MED1,MED12,MED13,MED14,MED16,MED17,MED19,MED20,MED23,MED24,MED25,MED27,MED30,MED4,MED6,MEF2A,NCOA1,NCOA3,RELA,SMAD3,STAT1,STAT3,TP53,VDR
GO:0006807	nitrogen compound metabolic process	38	8349	2.91e-09	ENSP00000237380,ENSP00000251871,ENSP00000258648,ENSP00000262367,ENSP00000263205,ENSP00000263253,ENSP00000264657,ENSP00000265350,ENSP00000269305,ENSP00000287727,ENSP00000290663,ENSP00000292035,ENSP00000297347,ENSP00000300651,ENSP00000314343,ENSP00000323720,ENSP00000325612,ENSP00000326767,ENSP00000332973,ENSP00000337340,ENSP00000346389,ENSP00000354394,ENSP00000357047,ENSP00000357907,ENSP00000361066…	CCNC,CDK19,CITED2,CREB1,CREBBP,EP300,HIF1A,MED1,MED12,MED13,MED14,MED15,MED16,MED17,MED18,MED19,MED20,MED22,MED23,MED24,MED25,MED27,MED28,MED29,MED30,MED4,MED6,MED8,MEF2A,NCOA1,NCOA3,RELA,SMAD3,STAT1,STAT3,TP53,VDR,ZFYVE9
GO:0044238	primary metabolic process	38	8808	1.84e-08	ENSP00000237380,ENSP00000251871,ENSP00000258648,ENSP00000262367,ENSP00000263205,ENSP00000263253,ENSP00000264657,ENSP00000265350,ENSP00000269305,ENSP00000287727,ENSP00000290663,ENSP00000292035,ENSP00000297347,ENSP00000300651,ENSP00000314343,ENSP00000323720,ENSP00000325612,ENSP00000326767,ENSP00000332973,ENSP00000337340,ENSP00000346389,ENSP00000354394,ENSP00000357047,ENSP00000357907,ENSP00000361066…	CCNC,CDK19,CITED2,CREB1,CREBBP,EP300,HIF1A,MED1,MED12,MED13,MED14,MED15,MED16,MED17,MED18,MED19,MED20,MED22,MED23,MED24,MED25,MED27,MED28,MED29,MED30,MED4,MED6,MED8,MEF2A,NCOA1,NCOA3,RELA,SMAD3,STAT1,STAT3,TP53,VDR,ZFYVE9
GO:1902895	positive regulation of pri-miRNA transcription by RNA polymerase II	5	25	1.1e-07	ENSP00000264657,ENSP00000269305,ENSP00000332973,ENSP00000384273,ENSP00000437955	HIF1A,RELA,SMAD3,STAT3,TP53
GO:0007165	signal transduction	28	4738	1.7e-07	ENSP00000251871,ENSP00000258648,ENSP00000262367,ENSP00000263253,ENSP00000264657,ENSP00000269305,ENSP00000270800,ENSP00000287727,ENSP00000290200,ENSP00000296980,ENSP00000297347,ENSP00000300651,ENSP00000323720,ENSP00000325612,ENSP00000332973,ENSP00000346389,ENSP00000354394,ENSP00000361066,ENSP00000363193,ENSP00000377686,ENSP00000380888,ENSP00000384273,ENSP00000385216,ENSP00000387699,ENSP00000437955…	CITED2,CREB1,CREBBP,EP300,HIF1A,IL10RB,IL22,IL22RA1,IL22RA2,MED1,MED12,MED13,MED14,MED16,MED17,MED24,MED30,MED4,MEF2A,NCOA1,NCOA3,RELA,SMAD3,STAT1,STAT3,TP53,VDR,ZFYVE9
GO:0043620	regulation of DNA-templated transcription in response to stress	6	73	3.58e-07	ENSP00000262367,ENSP00000263253,ENSP00000269305,ENSP00000384273,ENSP00000437955,ENSP00000444198	CITED2,CREBBP,EP300,HIF1A,RELA,TP53
GO:0000122	negative regulation of transcription by RNA polymerase II	12	809	1.93e-06	ENSP00000262367,ENSP00000263253,ENSP00000264657,ENSP00000269305,ENSP00000300651,ENSP00000326767,ENSP00000332973,ENSP00000346389,ENSP00000354394,ENSP00000384273,ENSP00000444198,ENSP00000447173	CITED2,CREBBP,EP300,MED1,MED25,MEF2A,RELA,SMAD3,STAT1,STAT3,TP53,VDR
GO:0019827	stem cell population maintenance	6	118	5.06e-06	ENSP00000237380,ENSP00000264657,ENSP00000292035,ENSP00000297347,ENSP00000323720,ENSP00000363193	MED12,MED14,MED27,MED28,MED30,STAT3
GO:0043618	regulation of transcription from RNA polymerase II promoter in response to stress	5	67	8.92e-06	ENSP00000262367,ENSP00000263253,ENSP00000269305,ENSP00000437955,ENSP00000444198	CITED2,CREBBP,EP300,HIF1A,TP53
GO:0009299	mRNA transcription	4	27	1.09e-05	ENSP00000264657,ENSP00000269305,ENSP00000300651,ENSP00000437955	HIF1A,MED1,STAT3,TP53
GO:0045892	negative regulation of transcription, DNA-templated	13	1169	1.26e-05	ENSP00000262367,ENSP00000263253,ENSP00000264657,ENSP00000269305,ENSP00000300651,ENSP00000326767,ENSP00000332973,ENSP00000346389,ENSP00000354394,ENSP00000384273,ENSP00000387699,ENSP00000444198,ENSP00000447173	CITED2,CREB1,CREBBP,EP300,MED1,MED25,MEF2A,RELA,SMAD3,STAT1,STAT3,TP53,VDR
GO:0045648	positive regulation of erythrocyte differentiation	4	29	1.39e-05	ENSP00000264657,ENSP00000300651,ENSP00000354394,ENSP00000437955	HIF1A,MED1,STAT1,STAT3
GO:0061418	regulation of transcription from RNA polymerase II promoter in response to hypoxia	4	32	1.95e-05	ENSP00000262367,ENSP00000263253,ENSP00000437955,ENSP00000444198	CITED2,CREBBP,EP300,HIF1A
GO:0045637	regulation of myeloid cell differentiation	7	249	2.02e-05	ENSP00000262367,ENSP00000263253,ENSP00000264657,ENSP00000300651,ENSP00000354394,ENSP00000387699,ENSP00000437955	CREB1,CREBBP,EP300,HIF1A,MED1,STAT1,STAT3
GO:0045639	positive regulation of myeloid cell differentiation	5	89	3.09e-05	ENSP00000264657,ENSP00000300651,ENSP00000354394,ENSP00000387699,ENSP00000437955	CREB1,HIF1A,MED1,STAT1,STAT3
GO:0051253	negative regulation of RNA metabolic process	13	1303	3.91e-05	ENSP00000262367,ENSP00000263253,ENSP00000264657,ENSP00000269305,ENSP00000300651,ENSP00000326767,ENSP00000332973,ENSP00000346389,ENSP00000354394,ENSP00000384273,ENSP00000387699,ENSP00000444198,ENSP00000447173	CITED2,CREB1,CREBBP,EP300,MED1,MED25,MEF2A,RELA,SMAD3,STAT1,STAT3,TP53,VDR
GO:0045597	positive regulation of cell differentiation	11	908	4.53e-05	ENSP00000264657,ENSP00000300651,ENSP00000332973,ENSP00000346389,ENSP00000354394,ENSP00000361066,ENSP00000384273,ENSP00000385216,ENSP00000387699,ENSP00000437955,ENSP00000447173	CREB1,HIF1A,MED1,MEF2A,NCOA1,NCOA3,RELA,SMAD3,STAT1,STAT3,VDR
GO:0051240	positive regulation of multicellular organismal process	14	1551	4.53e-05	ENSP00000262367,ENSP00000263253,ENSP00000264657,ENSP00000300651,ENSP00000332973,ENSP00000346389,ENSP00000354394,ENSP00000361066,ENSP00000384273,ENSP00000385216,ENSP00000387699,ENSP00000437955,ENSP00000444198,ENSP00000447173	CITED2,CREB1,CREBBP,EP300,HIF1A,MED1,MEF2A,NCOA1,NCOA3,RELA,SMAD3,STAT1,STAT3,VDR
GO:0001666	response to hypoxia	7	288	4.94e-05	ENSP00000262367,ENSP00000263253,ENSP00000269305,ENSP00000332973,ENSP00000387699,ENSP00000437955,ENSP00000444198	CITED2,CREB1,CREBBP,EP300,HIF1A,SMAD3,TP53
GO:0007595	lactation	4	44	5.74e-05	ENSP00000300651,ENSP00000387699,ENSP00000437955,ENSP00000447173	CREB1,HIF1A,MED1,VDR
GO:0071345	cellular response to cytokine stimulus	11	953	6.8e-05	ENSP00000264657,ENSP00000269305,ENSP00000270800,ENSP00000290200,ENSP00000296980,ENSP00000332973,ENSP00000354394,ENSP00000384273,ENSP00000387699,ENSP00000437955,ENSP00000442424	CREB1,HIF1A,IL10RB,IL22,IL22RA1,IL22RA2,RELA,SMAD3,STAT1,STAT3,TP53
GO:0009987	cellular process	42	14652	9.02e-05	ENSP00000237380,ENSP00000251871,ENSP00000258648,ENSP00000262367,ENSP00000263205,ENSP00000263253,ENSP00000264657,ENSP00000265350,ENSP00000269305,ENSP00000270800,ENSP00000287727,ENSP00000290200,ENSP00000290663,ENSP00000292035,ENSP00000296980,ENSP00000297347,ENSP00000300651,ENSP00000314343,ENSP00000323720,ENSP00000325612,ENSP00000326767,ENSP00000332973,ENSP00000337340,ENSP00000346389,ENSP00000354394…	CCNC,CDK19,CITED2,CREB1,CREBBP,EP300,HIF1A,IL10RB,IL22,IL22RA1,IL22RA2,MED1,MED12,MED13,MED14,MED15,MED16,MED17,MED18,MED19,MED20,MED22,MED23,MED24,MED25,MED27,MED28,MED29,MED30,MED4,MED6,MED8,MEF2A,NCOA1,NCOA3,RELA,SMAD3,STAT1,STAT3,TP53,VDR,ZFYVE9
GO:0010629	negative regulation of gene expression	14	1670	9.61e-05	ENSP00000262367,ENSP00000263253,ENSP00000264657,ENSP00000269305,ENSP00000300651,ENSP00000326767,ENSP00000332973,ENSP00000346389,ENSP00000354394,ENSP00000384273,ENSP00000387699,ENSP00000437955,ENSP00000444198,ENSP00000447173	CITED2,CREB1,CREBBP,EP300,HIF1A,MED1,MED25,MEF2A,RELA,SMAD3,STAT1,STAT3,TP53,VDR
GO:0035729	cellular response to hepatocyte growth factor stimulus	3	14	9.77e-05	ENSP00000300651,ENSP00000384273,ENSP00000387699	CREB1,MED1,RELA
GO:0007166	cell surface receptor signaling pathway	16	2198	9.84e-05	ENSP00000262367,ENSP00000263253,ENSP00000264657,ENSP00000269305,ENSP00000270800,ENSP00000287727,ENSP00000290200,ENSP00000296980,ENSP00000332973,ENSP00000354394,ENSP00000363193,ENSP00000384273,ENSP00000387699,ENSP00000437955,ENSP00000442424,ENSP00000444198	CITED2,CREB1,CREBBP,EP300,HIF1A,IL10RB,IL22,IL22RA1,IL22RA2,MED12,RELA,SMAD3,STAT1,STAT3,TP53,ZFYVE9
GO:0045595	regulation of cell differentiation	14	1695	0.00011	ENSP00000237380,ENSP00000262367,ENSP00000263253,ENSP00000264657,ENSP00000300651,ENSP00000332973,ENSP00000346389,ENSP00000354394,ENSP00000361066,ENSP00000384273,ENSP00000385216,ENSP00000387699,ENSP00000437955,ENSP00000447173	CREB1,CREBBP,EP300,HIF1A,MED1,MED28,MEF2A,NCOA1,NCOA3,RELA,SMAD3,STAT1,STAT3,VDR
GO:0045618	positive regulation of keratinocyte differentiation	3	16	0.00013	ENSP00000300651,ENSP00000361066,ENSP00000447173	MED1,NCOA3,VDR
GO:0019221	cytokine-mediated signaling pathway	9	655	0.00014	ENSP00000264657,ENSP00000269305,ENSP00000270800,ENSP00000290200,ENSP00000296980,ENSP00000354394,ENSP00000384273,ENSP00000437955,ENSP00000442424	HIF1A,IL10RB,IL22,IL22RA1,IL22RA2,RELA,STAT1,STAT3,TP53
GO:0042981	regulation of apoptotic process	13	1501	0.00015	ENSP00000262367,ENSP00000264657,ENSP00000269305,ENSP00000300651,ENSP00000332973,ENSP00000354394,ENSP00000357907,ENSP00000384273,ENSP00000385216,ENSP00000387699,ENSP00000437955,ENSP00000444198,ENSP00000447173	CDK19,CITED2,CREB1,CREBBP,HIF1A,MED1,NCOA1,RELA,SMAD3,STAT1,STAT3,TP53,VDR
GO:0007221	positive regulation of transcription of Notch receptor target	3	18	0.00017	ENSP00000262367,ENSP00000263253,ENSP00000354394	CREBBP,EP300,STAT1
GO:0051094	positive regulation of developmental process	12	1286	0.00017	ENSP00000264657,ENSP00000300651,ENSP00000332973,ENSP00000346389,ENSP00000354394,ENSP00000361066,ENSP00000384273,ENSP00000385216,ENSP00000387699,ENSP00000437955,ENSP00000444198,ENSP00000447173	CITED2,CREB1,HIF1A,MED1,MEF2A,NCOA1,NCOA3,RELA,SMAD3,STAT1,STAT3,VDR
GO:0032481	positive regulation of type I interferon production	4	65	0.0002	ENSP00000262367,ENSP00000263253,ENSP00000354394,ENSP00000384273	CREBBP,EP300,RELA,STAT1
GO:0071456	cellular response to hypoxia	5	139	0.0002	ENSP00000262367,ENSP00000263253,ENSP00000269305,ENSP00000437955,ENSP00000444198	CITED2,CREBBP,EP300,HIF1A,TP53
GO:0042789	mRNA transcription by RNA polymerase II	3	20	0.00022	ENSP00000264657,ENSP00000300651,ENSP00000437955	HIF1A,MED1,STAT3
GO:0001819	positive regulation of cytokine production	7	390	0.00027	ENSP00000262367,ENSP00000263253,ENSP00000332973,ENSP00000354394,ENSP00000384273,ENSP00000387699,ENSP00000437955	CREB1,CREBBP,EP300,HIF1A,RELA,SMAD3,STAT1
GO:0048732	gland development	7	395	0.00029	ENSP00000300651,ENSP00000332973,ENSP00000384273,ENSP00000387699,ENSP00000437955,ENSP00000444198,ENSP00000447173	CITED2,CREB1,HIF1A,MED1,RELA,SMAD3,VDR
GO:0050793	regulation of developmental process	16	2416	0.00029	ENSP00000237380,ENSP00000262367,ENSP00000263253,ENSP00000264657,ENSP00000300651,ENSP00000332973,ENSP00000346389,ENSP00000354394,ENSP00000361066,ENSP00000363193,ENSP00000384273,ENSP00000385216,ENSP00000387699,ENSP00000437955,ENSP00000444198,ENSP00000447173	CITED2,CREB1,CREBBP,EP300,HIF1A,MED1,MED12,MED28,MEF2A,NCOA1,NCOA3,RELA,SMAD3,STAT1,STAT3,VDR
GO:2000026	regulation of multicellular organismal development	14	1876	0.0003	ENSP00000262367,ENSP00000263253,ENSP00000264657,ENSP00000300651,ENSP00000332973,ENSP00000354394,ENSP00000361066,ENSP00000363193,ENSP00000384273,ENSP00000385216,ENSP00000387699,ENSP00000437955,ENSP00000444198,ENSP00000447173	CITED2,CREB1,CREBBP,EP300,HIF1A,MED1,MED12,NCOA1,NCOA3,RELA,SMAD3,STAT1,STAT3,VDR
GO:1901522	positive regulation of transcription from RNA polymerase II promoter involved in cellular response to chemical stimulus	3	23	0.00031	ENSP00000263253,ENSP00000384273,ENSP00000437955	EP300,HIF1A,RELA
GO:0035050	embryonic heart tube development	4	76	0.00034	ENSP00000300651,ENSP00000332973,ENSP00000437955,ENSP00000444198	CITED2,HIF1A,MED1,SMAD3
GO:0016032	viral process	8	571	0.00035	ENSP00000262367,ENSP00000263253,ENSP00000264657,ENSP00000269305,ENSP00000332973,ENSP00000354394,ENSP00000384273,ENSP00000387699	CREB1,CREBBP,EP300,RELA,SMAD3,STAT1,STAT3,TP53
GO:0032916	positive regulation of transforming growth factor beta3 production	2	2	0.00035	ENSP00000332973,ENSP00000387699	CREB1,SMAD3
GO:0009416	response to light stimulus	6	290	0.00048	ENSP00000262367,ENSP00000263253,ENSP00000269305,ENSP00000384273,ENSP00000387699,ENSP00000437955	CREB1,CREBBP,EP300,HIF1A,RELA,TP53
GO:0071634	regulation of transforming growth factor beta production	3	28	0.0005	ENSP00000332973,ENSP00000387699,ENSP00000437955	CREB1,HIF1A,SMAD3
GO:0035295	tube development	9	793	0.00051	ENSP00000263253,ENSP00000300651,ENSP00000332973,ENSP00000354394,ENSP00000363193,ENSP00000387699,ENSP00000437955,ENSP00000444198,ENSP00000447173	CITED2,CREB1,EP300,HIF1A,MED1,MED12,SMAD3,STAT1,VDR
GO:0018076	N-terminal peptidyl-lysine acetylation	2	3	0.00056	ENSP00000262367,ENSP00000263253	CREBBP,EP300
GO:0071354	cellular response to interleukin-6	3	30	0.00059	ENSP00000264657,ENSP00000354394,ENSP00000384273	RELA,STAT1,STAT3
GO:0050678	regulation of epithelial cell proliferation	6	311	0.00067	ENSP00000264657,ENSP00000300651,ENSP00000332973,ENSP00000354394,ENSP00000437955,ENSP00000447173	HIF1A,MED1,SMAD3,STAT1,STAT3,VDR
GO:0016573	histone acetylation	4	96	0.00075	ENSP00000262367,ENSP00000263253,ENSP00000361066,ENSP00000385216	CREBBP,EP300,NCOA1,NCOA3
GO:0060429	epithelium development	10	1055	0.00077	ENSP00000263253,ENSP00000300651,ENSP00000332973,ENSP00000354394,ENSP00000363193,ENSP00000384273,ENSP00000387699,ENSP00000437955,ENSP00000444198,ENSP00000447173	CITED2,CREB1,EP300,HIF1A,MED1,MED12,RELA,SMAD3,STAT1,VDR
GO:0007507	heart development	7	485	0.00089	ENSP00000263253,ENSP00000300651,ENSP00000332973,ENSP00000346389,ENSP00000363193,ENSP00000437955,ENSP00000444198	CITED2,EP300,HIF1A,MED1,MED12,MEF2A,SMAD3
GO:0006464	cellular protein modification process	17	2999	0.0009	ENSP00000262367,ENSP00000263253,ENSP00000265350,ENSP00000269305,ENSP00000290663,ENSP00000292035,ENSP00000297347,ENSP00000300651,ENSP00000332973,ENSP00000346389,ENSP00000357907,ENSP00000361066,ENSP00000363193,ENSP00000385216,ENSP00000387699,ENSP00000428982,ENSP00000437955	CCNC,CDK19,CREB1,CREBBP,EP300,HIF1A,MED1,MED12,MED20,MED27,MED30,MED8,MEF2A,NCOA1,NCOA3,SMAD3,TP53
GO:0009887	animal organ morphogenesis	9	865	0.00091	ENSP00000263253,ENSP00000264657,ENSP00000300651,ENSP00000332973,ENSP00000363193,ENSP00000384273,ENSP00000437955,ENSP00000444198,ENSP00000447173	CITED2,EP300,HIF1A,MED1,MED12,RELA,SMAD3,STAT3,VDR
GO:0031347	regulation of defense response	8	676	0.00099	ENSP00000262367,ENSP00000263253,ENSP00000296980,ENSP00000300651,ENSP00000332973,ENSP00000354394,ENSP00000357907,ENSP00000384273	CDK19,CREBBP,EP300,IL22RA2,MED1,RELA,SMAD3,STAT1
GO:2000027	regulation of animal organ morphogenesis	5	207	0.00099	ENSP00000300651,ENSP00000354394,ENSP00000363193,ENSP00000444198,ENSP00000447173	CITED2,MED1,MED12,STAT1,VDR
GO:0007584	response to nutrient	5	208	0.001	ENSP00000354394,ENSP00000384273,ENSP00000385216,ENSP00000387699,ENSP00000447173	CREB1,NCOA1,RELA,STAT1,VDR
GO:0009888	tissue development	12	1626	0.0013	ENSP00000263253,ENSP00000265350,ENSP00000300651,ENSP00000332973,ENSP00000346389,ENSP00000354394,ENSP00000363193,ENSP00000384273,ENSP00000387699,ENSP00000437955,ENSP00000444198,ENSP00000447173	CITED2,CREB1,EP300,HIF1A,MED1,MED12,MED20,MEF2A,RELA,SMAD3,STAT1,VDR
GO:0060745	mammary gland branching involved in pregnancy	2	6	0.0014	ENSP00000300651,ENSP00000447173	MED1,VDR
GO:0001889	liver development	4	123	0.0016	ENSP00000300651,ENSP00000332973,ENSP00000384273,ENSP00000444198	CITED2,MED1,RELA,SMAD3
GO:0045787	positive regulation of cell cycle	6	376	0.0016	ENSP00000263253,ENSP00000269305,ENSP00000300651,ENSP00000326767,ENSP00000428982,ENSP00000444198	CCNC,CITED2,EP300,MED1,MED25,TP53
GO:0070647	protein modification by small protein conjugation or removal	9	945	0.0016	ENSP00000265350,ENSP00000269305,ENSP00000290663,ENSP00000292035,ENSP00000297347,ENSP00000300651,ENSP00000332973,ENSP00000363193,ENSP00000437955	HIF1A,MED1,MED12,MED20,MED27,MED30,MED8,SMAD3,TP53
GO:0010742	macrophage derived foam cell differentiation	2	7	0.0017	ENSP00000263253,ENSP00000354394	EP300,STAT1
GO:0045747	positive regulation of Notch signaling pathway	3	48	0.0018	ENSP00000262367,ENSP00000263253,ENSP00000264657	CREBBP,EP300,STAT3
GO:0009653	anatomical structure morphogenesis	13	1992	0.0019	ENSP00000262367,ENSP00000263253,ENSP00000264657,ENSP00000300651,ENSP00000332973,ENSP00000346389,ENSP00000363193,ENSP00000384273,ENSP00000385216,ENSP00000387699,ENSP00000437955,ENSP00000444198,ENSP00000447173	CITED2,CREB1,CREBBP,EP300,HIF1A,MED1,MED12,MEF2A,NCOA1,RELA,SMAD3,STAT3,VDR
GO:0032909	regulation of transforming growth factor beta2 production	2	8	0.002	ENSP00000332973,ENSP00000437955	HIF1A,SMAD3
GO:0038114	interleukin-21-mediated signaling pathway	2	8	0.002	ENSP00000264657,ENSP00000354394	STAT1,STAT3
GO:0030856	regulation of epithelial cell differentiation	4	137	0.0023	ENSP00000300651,ENSP00000354394,ENSP00000361066,ENSP00000447173	MED1,NCOA3,STAT1,VDR
GO:0009411	response to UV	4	139	0.0024	ENSP00000262367,ENSP00000263253,ENSP00000269305,ENSP00000384273	CREBBP,EP300,RELA,TP53
GO:0038092	nodal signaling pathway	2	9	0.0024	ENSP00000332973,ENSP00000444198	CITED2,SMAD3
GO:0061180	mammary gland epithelium development	3	55	0.0025	ENSP00000300651,ENSP00000437955,ENSP00000447173	HIF1A,MED1,VDR
GO:0048568	embryonic organ development	6	417	0.0026	ENSP00000300651,ENSP00000332973,ENSP00000363193,ENSP00000385216,ENSP00000437955,ENSP00000444198	CITED2,HIF1A,MED1,MED12,NCOA1,SMAD3
GO:0001890	placenta development	4	145	0.0027	ENSP00000300651,ENSP00000385216,ENSP00000437955,ENSP00000447173	HIF1A,MED1,NCOA1,VDR
GO:0010646	regulation of cell communication	17	3327	0.0027	ENSP00000262367,ENSP00000263253,ENSP00000264657,ENSP00000269305,ENSP00000296980,ENSP00000300651,ENSP00000332973,ENSP00000354394,ENSP00000361066,ENSP00000363193,ENSP00000380888,ENSP00000384273,ENSP00000385216,ENSP00000387699,ENSP00000437955,ENSP00000442424,ENSP00000444198	CITED2,CREB1,CREBBP,EP300,HIF1A,IL22,IL22RA2,MED1,MED12,MED13,NCOA1,NCOA3,RELA,SMAD3,STAT1,STAT3,TP53
GO:0009966	regulation of signal transduction	16	3033	0.003	ENSP00000262367,ENSP00000263253,ENSP00000264657,ENSP00000269305,ENSP00000296980,ENSP00000300651,ENSP00000332973,ENSP00000354394,ENSP00000361066,ENSP00000363193,ENSP00000380888,ENSP00000384273,ENSP00000385216,ENSP00000437955,ENSP00000442424,ENSP00000444198	CITED2,CREBBP,EP300,HIF1A,IL22,IL22RA2,MED1,MED12,MED13,NCOA1,NCOA3,RELA,SMAD3,STAT1,STAT3,TP53
GO:0023051	regulation of signaling	17	3360	0.003	ENSP00000262367,ENSP00000263253,ENSP00000264657,ENSP00000269305,ENSP00000296980,ENSP00000300651,ENSP00000332973,ENSP00000354394,ENSP00000361066,ENSP00000363193,ENSP00000380888,ENSP00000384273,ENSP00000385216,ENSP00000387699,ENSP00000437955,ENSP00000442424,ENSP00000444198	CITED2,CREB1,CREBBP,EP300,HIF1A,IL22,IL22RA2,MED1,MED12,MED13,NCOA1,NCOA3,RELA,SMAD3,STAT1,STAT3,TP53
GO:0009628	response to abiotic stimulus	9	1052	0.0031	ENSP00000262367,ENSP00000263253,ENSP00000269305,ENSP00000332973,ENSP00000354394,ENSP00000384273,ENSP00000387699,ENSP00000437955,ENSP00000444198	CITED2,CREB1,CREBBP,EP300,HIF1A,RELA,SMAD3,STAT1,TP53
GO:0045899	positive regulation of RNA polymerase II transcriptional preinitiation complex assembly	2	11	0.0032	ENSP00000269305,ENSP00000387699	CREB1,TP53
GO:0070106	interleukin-27-mediated signaling pathway	2	11	0.0032	ENSP00000264657,ENSP00000354394	STAT1,STAT3
GO:0070757	interleukin-35-mediated signaling pathway	2	11	0.0032	ENSP00000264657,ENSP00000354394	STAT1,STAT3
GO:0002223	stimulatory C-type lectin receptor signaling pathway	3	62	0.0033	ENSP00000262367,ENSP00000263253,ENSP00000384273	CREBBP,EP300,RELA
GO:0001756	somitogenesis	3	63	0.0034	ENSP00000263253,ENSP00000332973,ENSP00000363193	EP300,MED12,SMAD3
GO:1901653	cellular response to peptide	5	289	0.0036	ENSP00000264657,ENSP00000269305,ENSP00000354394,ENSP00000384273,ENSP00000387699	CREB1,RELA,STAT1,STAT3,TP53
GO:0031324	negative regulation of cellular metabolic process	14	2463	0.0037	ENSP00000262367,ENSP00000263253,ENSP00000264657,ENSP00000269305,ENSP00000300651,ENSP00000326767,ENSP00000332973,ENSP00000346389,ENSP00000354394,ENSP00000384273,ENSP00000387699,ENSP00000437955,ENSP00000444198,ENSP00000447173	CITED2,CREB1,CREBBP,EP300,HIF1A,MED1,MED25,MEF2A,RELA,SMAD3,STAT1,STAT3,TP53,VDR
GO:0031667	response to nutrient levels	6	455	0.0037	ENSP00000269305,ENSP00000354394,ENSP00000384273,ENSP00000385216,ENSP00000387699,ENSP00000447173	CREB1,NCOA1,RELA,STAT1,TP53,VDR
GO:0046824	positive regulation of nucleocytoplasmic transport	3	65	0.0037	ENSP00000269305,ENSP00000300651,ENSP00000332973	MED1,SMAD3,TP53
GO:0001501	skeletal system development	6	457	0.0038	ENSP00000263253,ENSP00000300651,ENSP00000332973,ENSP00000363193,ENSP00000437955,ENSP00000447173	EP300,HIF1A,MED1,MED12,SMAD3,VDR
GO:0051239	regulation of multicellular organismal process	15	2788	0.0038	ENSP00000262367,ENSP00000263253,ENSP00000264657,ENSP00000300651,ENSP00000332973,ENSP00000346389,ENSP00000354394,ENSP00000361066,ENSP00000363193,ENSP00000384273,ENSP00000385216,ENSP00000387699,ENSP00000437955,ENSP00000444198,ENSP00000447173	CITED2,CREB1,CREBBP,EP300,HIF1A,MED1,MED12,MEF2A,NCOA1,NCOA3,RELA,SMAD3,STAT1,STAT3,VDR
GO:0060562	epithelial tube morphogenesis	5	298	0.0039	ENSP00000300651,ENSP00000332973,ENSP00000363193,ENSP00000437955,ENSP00000447173	HIF1A,MED1,MED12,SMAD3,VDR
GO:0010839	negative regulation of keratinocyte proliferation	2	13	0.004	ENSP00000300651,ENSP00000447173	MED1,VDR
GO:0070243	regulation of thymocyte apoptotic process	2	13	0.004	ENSP00000269305,ENSP00000437955	HIF1A,TP53
GO:0019538	protein metabolic process	19	4194	0.0042	ENSP00000262367,ENSP00000263253,ENSP00000265350,ENSP00000269305,ENSP00000287727,ENSP00000290663,ENSP00000292035,ENSP00000297347,ENSP00000300651,ENSP00000332973,ENSP00000346389,ENSP00000357907,ENSP00000361066,ENSP00000363193,ENSP00000384273,ENSP00000385216,ENSP00000387699,ENSP00000428982,ENSP00000437955	CCNC,CDK19,CREB1,CREBBP,EP300,HIF1A,MED1,MED12,MED20,MED27,MED30,MED8,MEF2A,NCOA1,NCOA3,RELA,SMAD3,TP53,ZFYVE9
GO:2000377	regulation of reactive oxygen species metabolic process	4	169	0.0043	ENSP00000264657,ENSP00000269305,ENSP00000332973,ENSP00000437955	HIF1A,SMAD3,STAT3,TP53
GO:0002684	positive regulation of immune system process	8	882	0.0044	ENSP00000262367,ENSP00000263253,ENSP00000264657,ENSP00000300651,ENSP00000354394,ENSP00000384273,ENSP00000387699,ENSP00000437955	CREB1,CREBBP,EP300,HIF1A,MED1,RELA,STAT1,STAT3
GO:0008285	negative regulation of cell population proliferation	7	669	0.0044	ENSP00000264657,ENSP00000269305,ENSP00000300651,ENSP00000326767,ENSP00000332973,ENSP00000354394,ENSP00000447173	MED1,MED25,SMAD3,STAT1,STAT3,TP53,VDR
GO:0010647	positive regulation of cell communication	11	1631	0.0044	ENSP00000262367,ENSP00000263253,ENSP00000264657,ENSP00000269305,ENSP00000300651,ENSP00000332973,ENSP00000361066,ENSP00000384273,ENSP00000387699,ENSP00000437955,ENSP00000444198	CITED2,CREB1,CREBBP,EP300,HIF1A,MED1,NCOA3,RELA,SMAD3,STAT3,TP53
GO:0023056	positive regulation of signaling	11	1638	0.0044	ENSP00000262367,ENSP00000263253,ENSP00000264657,ENSP00000269305,ENSP00000300651,ENSP00000332973,ENSP00000361066,ENSP00000384273,ENSP00000387699,ENSP00000437955,ENSP00000444198	CITED2,CREB1,CREBBP,EP300,HIF1A,MED1,NCOA3,RELA,SMAD3,STAT3,TP53
GO:0070102	interleukin-6-mediated signaling pathway	2	14	0.0044	ENSP00000264657,ENSP00000354394	STAT1,STAT3
GO:0009790	embryo development	8	890	0.0046	ENSP00000262367,ENSP00000263253,ENSP00000300651,ENSP00000332973,ENSP00000363193,ENSP00000385216,ENSP00000437955,ENSP00000444198	CITED2,CREBBP,EP300,HIF1A,MED1,MED12,NCOA1,SMAD3
GO:0051704	multi-organism process	13	2222	0.0046	ENSP00000262367,ENSP00000263253,ENSP00000264657,ENSP00000269305,ENSP00000270800,ENSP00000290200,ENSP00000300651,ENSP00000332973,ENSP00000354394,ENSP00000357907,ENSP00000384273,ENSP00000387699,ENSP00000447173	CDK19,CREB1,CREBBP,EP300,IL10RB,IL22RA1,MED1,RELA,SMAD3,STAT1,STAT3,TP53,VDR
GO:0051726	regulation of cell cycle	9	1129	0.0046	ENSP00000263253,ENSP00000264657,ENSP00000269305,ENSP00000300651,ENSP00000326767,ENSP00000332973,ENSP00000357907,ENSP00000428982,ENSP00000444198	CCNC,CDK19,CITED2,EP300,MED1,MED25,SMAD3,STAT3,TP53
GO:0048583	regulation of response to stimulus	18	3882	0.0047	ENSP00000262367,ENSP00000263253,ENSP00000264657,ENSP00000269305,ENSP00000296980,ENSP00000300651,ENSP00000332973,ENSP00000346389,ENSP00000354394,ENSP00000357907,ENSP00000361066,ENSP00000363193,ENSP00000380888,ENSP00000384273,ENSP00000385216,ENSP00000437955,ENSP00000442424,ENSP00000444198	CDK19,CITED2,CREBBP,EP300,HIF1A,IL22,IL22RA2,MED1,MED12,MED13,MEF2A,NCOA1,NCOA3,RELA,SMAD3,STAT1,STAT3,TP53
GO:1901701	cellular response to oxygen-containing compound	8	896	0.0047	ENSP00000264657,ENSP00000269305,ENSP00000354394,ENSP00000357907,ENSP00000361066,ENSP00000384273,ENSP00000387699,ENSP00000447173	CDK19,CREB1,NCOA3,RELA,STAT1,STAT3,TP53,VDR
GO:0035855	megakaryocyte development	2	15	0.0048	ENSP00000263253,ENSP00000300651	EP300,MED1
GO:0034644	cellular response to UV	3	78	0.0055	ENSP00000262367,ENSP00000263253,ENSP00000269305	CREBBP,EP300,TP53
GO:0060485	mesenchyme development	4	187	0.0058	ENSP00000332973,ENSP00000354394,ENSP00000437955,ENSP00000444198	CITED2,HIF1A,SMAD3,STAT1
GO:0007178	transmembrane receptor protein serine/threonine kinase signaling pathway	4	189	0.0059	ENSP00000287727,ENSP00000332973,ENSP00000387699,ENSP00000444198	CITED2,CREB1,SMAD3,ZFYVE9
GO:0048145	regulation of fibroblast proliferation	3	84	0.0066	ENSP00000269305,ENSP00000326767,ENSP00000387699	CREB1,MED25,TP53
GO:0060548	negative regulation of cell death	8	953	0.0066	ENSP00000264657,ENSP00000269305,ENSP00000300651,ENSP00000332973,ENSP00000384273,ENSP00000387699,ENSP00000437955,ENSP00000444198	CITED2,CREB1,HIF1A,MED1,RELA,SMAD3,STAT3,TP53
GO:0071158	positive regulation of cell cycle arrest	3	85	0.0068	ENSP00000263253,ENSP00000269305,ENSP00000326767	EP300,MED25,TP53
GO:0001892	embryonic placenta development	3	86	0.0069	ENSP00000300651,ENSP00000385216,ENSP00000437955	HIF1A,MED1,NCOA1
GO:0032332	positive regulation of chondrocyte differentiation	2	19	0.0069	ENSP00000332973,ENSP00000384273	RELA,SMAD3
GO:0051123	RNA polymerase II preinitiation complex assembly	2	19	0.0069	ENSP00000269305,ENSP00000481920	MED6,TP53
GO:0007179	transforming growth factor beta receptor signaling pathway	3	88	0.0073	ENSP00000287727,ENSP00000332973,ENSP00000387699	CREB1,SMAD3,ZFYVE9
GO:0035162	embryonic hemopoiesis	2	20	0.0075	ENSP00000300651,ENSP00000437955	HIF1A,MED1
GO:0009967	positive regulation of signal transduction	10	1493	0.0077	ENSP00000262367,ENSP00000263253,ENSP00000264657,ENSP00000269305,ENSP00000300651,ENSP00000332973,ENSP00000361066,ENSP00000384273,ENSP00000437955,ENSP00000444198	CITED2,CREBBP,EP300,HIF1A,MED1,NCOA3,RELA,SMAD3,STAT3,TP53
GO:0045088	regulation of innate immune response	5	361	0.0079	ENSP00000262367,ENSP00000263253,ENSP00000300651,ENSP00000354394,ENSP00000384273	CREBBP,EP300,MED1,RELA,STAT1
GO:0048598	embryonic morphogenesis	6	545	0.0079	ENSP00000262367,ENSP00000300651,ENSP00000332973,ENSP00000363193,ENSP00000385216,ENSP00000437955	CREBBP,HIF1A,MED1,MED12,NCOA1,SMAD3
GO:0031349	positive regulation of defense response	5	365	0.0081	ENSP00000262367,ENSP00000263253,ENSP00000300651,ENSP00000357907,ENSP00000384273	CDK19,CREBBP,EP300,MED1,RELA
GO:0043009	chordate embryonic development	6	550	0.0081	ENSP00000263253,ENSP00000300651,ENSP00000332973,ENSP00000363193,ENSP00000385216,ENSP00000437955	EP300,HIF1A,MED1,MED12,NCOA1,SMAD3
GO:0019216	regulation of lipid metabolic process	5	373	0.0087	ENSP00000262367,ENSP00000300651,ENSP00000385216,ENSP00000387699,ENSP00000447173	CREB1,CREBBP,MED1,NCOA1,VDR
GO:0030325	adrenal gland development	2	23	0.0092	ENSP00000332973,ENSP00000444198	CITED2,SMAD3
GO:1901699	cellular response to nitrogen compound	6	568	0.0092	ENSP00000264657,ENSP00000269305,ENSP00000332973,ENSP00000354394,ENSP00000384273,ENSP00000387699	CREB1,RELA,SMAD3,STAT1,STAT3,TP53
GO:0046885	regulation of hormone biosynthetic process	2	25	0.0106	ENSP00000437955,ENSP00000447173	HIF1A,VDR
GO:0080134	regulation of response to stress	9	1299	0.0106	ENSP00000262367,ENSP00000263253,ENSP00000296980,ENSP00000300651,ENSP00000332973,ENSP00000354394,ENSP00000357907,ENSP00000384273,ENSP00000437955	CDK19,CREBBP,EP300,HIF1A,IL22RA2,MED1,RELA,SMAD3,STAT1
GO:0036003	positive regulation of transcription from RNA polymerase II promoter in response to stress	2	26	0.0113	ENSP00000269305,ENSP00000437955	HIF1A,TP53
GO:0060334	regulation of interferon-gamma-mediated signaling pathway	2	26	0.0113	ENSP00000300651,ENSP00000354394	MED1,STAT1
GO:0003007	heart morphogenesis	4	235	0.0114	ENSP00000300651,ENSP00000332973,ENSP00000437955,ENSP00000444198	CITED2,HIF1A,MED1,SMAD3
GO:0042127	regulation of cell population proliferation	10	1594	0.0115	ENSP00000264657,ENSP00000269305,ENSP00000300651,ENSP00000326767,ENSP00000332973,ENSP00000354394,ENSP00000384273,ENSP00000387699,ENSP00000437955,ENSP00000447173	CREB1,HIF1A,MED1,MED25,RELA,SMAD3,STAT1,STAT3,TP53,VDR
GO:0032502	developmental process	21	5401	0.0116	ENSP00000237380,ENSP00000262367,ENSP00000263253,ENSP00000264657,ENSP00000265350,ENSP00000269305,ENSP00000292035,ENSP00000297347,ENSP00000300651,ENSP00000323720,ENSP00000332973,ENSP00000346389,ENSP00000354394,ENSP00000361066,ENSP00000363193,ENSP00000384273,ENSP00000385216,ENSP00000387699,ENSP00000437955,ENSP00000444198,ENSP00000447173	CITED2,CREB1,CREBBP,EP300,HIF1A,MED1,MED12,MED14,MED20,MED27,MED28,MED30,MEF2A,NCOA1,NCOA3,RELA,SMAD3,STAT1,STAT3,TP53,VDR
GO:0002520	immune system development	6	601	0.0117	ENSP00000263253,ENSP00000264657,ENSP00000300651,ENSP00000332973,ENSP00000437955,ENSP00000444198	CITED2,EP300,HIF1A,MED1,SMAD3,STAT3
GO:0003401	axis elongation	2	27	0.0117	ENSP00000300651,ENSP00000363193	MED1,MED12
GO:2001171	positive regulation of ATP biosynthetic process	2	27	0.0117	ENSP00000264657,ENSP00000437955	HIF1A,STAT3
GO:0043065	positive regulation of apoptotic process	6	604	0.0119	ENSP00000269305,ENSP00000332973,ENSP00000357907,ENSP00000385216,ENSP00000387699,ENSP00000447173	CDK19,CREB1,NCOA1,SMAD3,TP53,VDR
GO:0048869	cellular developmental process	16	3533	0.0119	ENSP00000263253,ENSP00000264657,ENSP00000265350,ENSP00000269305,ENSP00000300651,ENSP00000332973,ENSP00000346389,ENSP00000354394,ENSP00000361066,ENSP00000363193,ENSP00000384273,ENSP00000385216,ENSP00000387699,ENSP00000437955,ENSP00000444198,ENSP00000447173	CITED2,CREB1,EP300,HIF1A,MED1,MED12,MED20,MEF2A,NCOA1,NCOA3,RELA,SMAD3,STAT1,STAT3,TP53,VDR
GO:0007389	pattern specification process	5	409	0.0121	ENSP00000263253,ENSP00000332973,ENSP00000363193,ENSP00000437955,ENSP00000444198	CITED2,EP300,HIF1A,MED12,SMAD3
GO:0048646	anatomical structure formation involved in morphogenesis	7	831	0.0122	ENSP00000263253,ENSP00000300651,ENSP00000332973,ENSP00000346389,ENSP00000363193,ENSP00000437955,ENSP00000444198	CITED2,EP300,HIF1A,MED1,MED12,MEF2A,SMAD3
GO:0071375	cellular response to peptide hormone stimulus	4	245	0.0126	ENSP00000264657,ENSP00000354394,ENSP00000384273,ENSP00000387699	CREB1,RELA,STAT1,STAT3
GO:0048147	negative regulation of fibroblast proliferation	2	29	0.0129	ENSP00000269305,ENSP00000326767	MED25,TP53
GO:1904837	beta-catenin-TCF complex assembly	2	29	0.0129	ENSP00000262367,ENSP00000263253	CREBBP,EP300
GO:0007368	determination of left/right symmetry	3	115	0.013	ENSP00000332973,ENSP00000437955,ENSP00000444198	CITED2,HIF1A,SMAD3
GO:0031647	regulation of protein stability	4	251	0.0132	ENSP00000262367,ENSP00000263253,ENSP00000332973,ENSP00000387699	CREB1,CREBBP,EP300,SMAD3
GO:0048511	rhythmic process	4	250	0.0132	ENSP00000262367,ENSP00000263253,ENSP00000269305,ENSP00000387699	CREB1,CREBBP,EP300,TP53
GO:0042771	intrinsic apoptotic signaling pathway in response to DNA damage by p53 class mediator	2	30	0.0133	ENSP00000263253,ENSP00000269305	EP300,TP53
GO:0007568	aging	4	255	0.0138	ENSP00000264657,ENSP00000269305,ENSP00000384273,ENSP00000387699	CREB1,RELA,STAT3,TP53
GO:0043066	negative regulation of apoptotic process	7	859	0.0138	ENSP00000264657,ENSP00000269305,ENSP00000300651,ENSP00000332973,ENSP00000384273,ENSP00000437955,ENSP00000444198	CITED2,HIF1A,MED1,RELA,SMAD3,STAT3,TP53
GO:0035270	endocrine system development	3	120	0.0141	ENSP00000332973,ENSP00000387699,ENSP00000444198	CITED2,CREB1,SMAD3
GO:0048513	animal organ development	14	2926	0.0143	ENSP00000263253,ENSP00000264657,ENSP00000265350,ENSP00000300651,ENSP00000332973,ENSP00000346389,ENSP00000354394,ENSP00000363193,ENSP00000384273,ENSP00000385216,ENSP00000387699,ENSP00000437955,ENSP00000444198,ENSP00000447173	CITED2,CREB1,EP300,HIF1A,MED1,MED12,MED20,MEF2A,NCOA1,RELA,SMAD3,STAT1,STAT3,VDR
GO:0009607	response to biotic stimulus	7	869	0.0144	ENSP00000269305,ENSP00000270800,ENSP00000290200,ENSP00000332973,ENSP00000354394,ENSP00000357907,ENSP00000384273	CDK19,IL10RB,IL22RA1,RELA,SMAD3,STAT1,TP53
GO:0045089	positive regulation of innate immune response	4	259	0.0144	ENSP00000262367,ENSP00000263253,ENSP00000300651,ENSP00000384273	CREBBP,EP300,MED1,RELA
GO:0001936	regulation of endothelial cell proliferation	3	122	0.0145	ENSP00000264657,ENSP00000354394,ENSP00000437955	HIF1A,STAT1,STAT3
GO:0002682	regulation of immune system process	9	1391	0.0145	ENSP00000262367,ENSP00000263253,ENSP00000264657,ENSP00000300651,ENSP00000332973,ENSP00000354394,ENSP00000384273,ENSP00000387699,ENSP00000437955	CREB1,CREBBP,EP300,HIF1A,MED1,RELA,SMAD3,STAT1,STAT3
GO:0050680	negative regulation of epithelial cell proliferation	3	122	0.0145	ENSP00000300651,ENSP00000354394,ENSP00000447173	MED1,STAT1,VDR
GO:0016567	protein ubiquitination	6	645	0.0147	ENSP00000265350,ENSP00000290663,ENSP00000292035,ENSP00000297347,ENSP00000300651,ENSP00000363193	MED1,MED12,MED20,MED27,MED30,MED8
GO:1903580	positive regulation of ATP metabolic process	2	33	0.015	ENSP00000264657,ENSP00000437955	HIF1A,STAT3
GO:0003231	cardiac ventricle development	3	125	0.0152	ENSP00000300651,ENSP00000437955,ENSP00000444198	CITED2,HIF1A,MED1
GO:0090316	positive regulation of intracellular protein transport	3	126	0.0155	ENSP00000269305,ENSP00000300651,ENSP00000332973	MED1,SMAD3,TP53
GO:0003206	cardiac chamber morphogenesis	3	128	0.0161	ENSP00000300651,ENSP00000437955,ENSP00000444198	CITED2,HIF1A,MED1
GO:0014706	striated muscle tissue development	4	271	0.0162	ENSP00000263253,ENSP00000265350,ENSP00000300651,ENSP00000346389	EP300,MED1,MED20,MEF2A
GO:0090068	positive regulation of cell cycle process	4	273	0.0165	ENSP00000263253,ENSP00000269305,ENSP00000300651,ENSP00000326767	EP300,MED1,MED25,TP53
GO:0044093	positive regulation of molecular function	10	1713	0.0166	ENSP00000263253,ENSP00000264657,ENSP00000300651,ENSP00000326767,ENSP00000332973,ENSP00000361066,ENSP00000384273,ENSP00000428982,ENSP00000437955,ENSP00000447173	CCNC,EP300,HIF1A,MED1,MED25,NCOA3,RELA,SMAD3,STAT3,VDR
GO:0006110	regulation of glycolytic process	2	38	0.0189	ENSP00000264657,ENSP00000437955	HIF1A,STAT3
GO:0007623	circadian rhythm	3	137	0.0189	ENSP00000263253,ENSP00000269305,ENSP00000387699	CREB1,EP300,TP53
GO:0030811	regulation of nucleotide catabolic process	2	38	0.0189	ENSP00000264657,ENSP00000437955	HIF1A,STAT3
GO:0048584	positive regulation of response to stimulus	11	2054	0.0189	ENSP00000262367,ENSP00000263253,ENSP00000264657,ENSP00000269305,ENSP00000300651,ENSP00000332973,ENSP00000357907,ENSP00000361066,ENSP00000384273,ENSP00000437955,ENSP00000444198	CDK19,CITED2,CREBBP,EP300,HIF1A,MED1,NCOA3,RELA,SMAD3,STAT3,TP53
GO:0007517	muscle organ development	4	287	0.0191	ENSP00000263253,ENSP00000265350,ENSP00000300651,ENSP00000346389	EP300,MED1,MED20,MEF2A
GO:1901214	regulation of neuron death	4	288	0.0192	ENSP00000264657,ENSP00000269305,ENSP00000387699,ENSP00000437955	CREB1,HIF1A,STAT3,TP53
GO:0071363	cellular response to growth factor stimulus	5	477	0.0196	ENSP00000287727,ENSP00000300651,ENSP00000332973,ENSP00000384273,ENSP00000387699	CREB1,MED1,RELA,SMAD3,ZFYVE9
GO:0006954	inflammatory response	5	482	0.0203	ENSP00000264657,ENSP00000290200,ENSP00000384273,ENSP00000437955,ENSP00000442424	HIF1A,IL10RB,IL22,RELA,STAT3
GO:0007259	receptor signaling pathway via JAK-STAT	2	41	0.0209	ENSP00000264657,ENSP00000354394	STAT1,STAT3
GO:0010035	response to inorganic substance	5	491	0.0217	ENSP00000346389,ENSP00000354394,ENSP00000384273,ENSP00000387699,ENSP00000437955	CREB1,HIF1A,MEF2A,RELA,STAT1
GO:0031648	protein destabilization	2	42	0.0217	ENSP00000262367,ENSP00000263253	CREBBP,EP300
GO:0042307	positive regulation of protein import into nucleus	2	42	0.0217	ENSP00000300651,ENSP00000332973	MED1,SMAD3
GO:0051646	mitochondrion localization	2	42	0.0217	ENSP00000346389,ENSP00000437955	HIF1A,MEF2A
GO:0090311	regulation of protein deacetylation	2	42	0.0217	ENSP00000263253,ENSP00000269305	EP300,TP53
GO:0022603	regulation of anatomical structure morphogenesis	7	961	0.0221	ENSP00000264657,ENSP00000300651,ENSP00000354394,ENSP00000363193,ENSP00000437955,ENSP00000444198,ENSP00000447173	CITED2,HIF1A,MED1,MED12,STAT1,STAT3,VDR
GO:2000273	positive regulation of signaling receptor activity	2	43	0.0223	ENSP00000300651,ENSP00000361066	MED1,NCOA3
GO:0046677	response to antibiotic	4	305	0.0224	ENSP00000264657,ENSP00000269305,ENSP00000354394,ENSP00000384273	RELA,STAT1,STAT3,TP53
GO:0001701	in utero embryonic development	4	306	0.0226	ENSP00000300651,ENSP00000332973,ENSP00000385216,ENSP00000437955	HIF1A,MED1,NCOA1,SMAD3
GO:0001959	regulation of cytokine-mediated signaling pathway	3	151	0.023	ENSP00000300651,ENSP00000354394,ENSP00000437955	HIF1A,MED1,STAT1
GO:0001961	positive regulation of cytokine-mediated signaling pathway	2	45	0.0237	ENSP00000300651,ENSP00000437955	HIF1A,MED1
GO:0003002	regionalization	4	313	0.0237	ENSP00000263253,ENSP00000332973,ENSP00000363193,ENSP00000444198	CITED2,EP300,MED12,SMAD3
GO:0006953	acute-phase response	2	45	0.0237	ENSP00000264657,ENSP00000442424	IL22,STAT3
GO:0008542	visual learning	2	45	0.0237	ENSP00000387699,ENSP00000437955	CREB1,HIF1A
GO:0032101	regulation of response to external stimulus	6	732	0.0237	ENSP00000296980,ENSP00000300651,ENSP00000332973,ENSP00000354394,ENSP00000357907,ENSP00000384273	CDK19,IL22RA2,MED1,RELA,SMAD3,STAT1
GO:0032459	regulation of protein oligomerization	2	45	0.0237	ENSP00000263253,ENSP00000269305	EP300,TP53
GO:0035195	gene silencing by miRNA	2	45	0.0237	ENSP00000264657,ENSP00000332973	SMAD3,STAT3
GO:0050767	regulation of neurogenesis	6	730	0.0237	ENSP00000264657,ENSP00000300651,ENSP00000384273,ENSP00000385216,ENSP00000387699,ENSP00000437955	CREB1,HIF1A,MED1,NCOA1,RELA,STAT3
GO:1900034	regulation of cellular response to heat	2	45	0.0237	ENSP00000262367,ENSP00000263253	CREBBP,EP300
GO:0048701	embryonic cranial skeleton morphogenesis	2	46	0.024	ENSP00000332973,ENSP00000363193	MED12,SMAD3
GO:0009605	response to external stimulus	10	1857	0.0258	ENSP00000269305,ENSP00000270800,ENSP00000290200,ENSP00000332973,ENSP00000354394,ENSP00000357907,ENSP00000384273,ENSP00000385216,ENSP00000387699,ENSP00000447173	CDK19,CREB1,IL10RB,IL22RA1,NCOA1,RELA,SMAD3,STAT1,TP53,VDR
GO:0048546	digestive tract morphogenesis	2	48	0.0258	ENSP00000332973,ENSP00000437955	HIF1A,SMAD3
GO:0035094	response to nicotine	2	49	0.0265	ENSP00000384273,ENSP00000387699	CREB1,RELA
GO:0043967	histone H4 acetylation	2	49	0.0265	ENSP00000263253,ENSP00000385216	EP300,NCOA1
GO:0051353	positive regulation of oxidoreductase activity	2	50	0.0274	ENSP00000437955,ENSP00000447173	HIF1A,VDR
GO:2000378	negative regulation of reactive oxygen species metabolic process	2	50	0.0274	ENSP00000264657,ENSP00000437955	HIF1A,STAT3
GO:0050821	protein stabilization	3	166	0.0276	ENSP00000263253,ENSP00000332973,ENSP00000387699	CREB1,EP300,SMAD3
GO:0050727	regulation of inflammatory response	4	338	0.0291	ENSP00000296980,ENSP00000332973,ENSP00000357907,ENSP00000384273	CDK19,IL22RA2,RELA,SMAD3
GO:0001654	eye development	4	339	0.0294	ENSP00000264657,ENSP00000300651,ENSP00000332973,ENSP00000437955	HIF1A,MED1,SMAD3,STAT3
GO:0010611	regulation of cardiac muscle hypertrophy	2	54	0.0307	ENSP00000332973,ENSP00000346389	MEF2A,SMAD3
GO:0051196	regulation of coenzyme metabolic process	2	54	0.0307	ENSP00000264657,ENSP00000437955	HIF1A,STAT3
GO:0071216	cellular response to biotic stimulus	3	176	0.0313	ENSP00000269305,ENSP00000357907,ENSP00000384273	CDK19,RELA,TP53
GO:0050679	positive regulation of epithelial cell proliferation	3	178	0.0321	ENSP00000264657,ENSP00000300651,ENSP00000437955	HIF1A,MED1,STAT3
GO:0032768	regulation of monooxygenase activity	2	56	0.0322	ENSP00000437955,ENSP00000447173	HIF1A,VDR
GO:0051607	defense response to virus	3	181	0.0332	ENSP00000290200,ENSP00000354394,ENSP00000384273	IL10RB,RELA,STAT1
GO:0001947	heart looping	2	59	0.035	ENSP00000332973,ENSP00000437955	HIF1A,SMAD3
GO:0006977	DNA damage response, signal transduction by p53 class mediator resulting in cell cycle arrest	2	59	0.035	ENSP00000263253,ENSP00000269305	EP300,TP53
GO:0031670	cellular response to nutrient	2	59	0.035	ENSP00000385216,ENSP00000447173	NCOA1,VDR
GO:0048534	hematopoietic or lymphoid organ development	5	573	0.035	ENSP00000263253,ENSP00000264657,ENSP00000300651,ENSP00000437955,ENSP00000444198	CITED2,EP300,HIF1A,MED1,STAT3
GO:0048523	negative regulation of cellular process	17	4454	0.0355	ENSP00000237380,ENSP00000262367,ENSP00000263253,ENSP00000264657,ENSP00000269305,ENSP00000300651,ENSP00000326767,ENSP00000332973,ENSP00000346389,ENSP00000354394,ENSP00000363193,ENSP00000380888,ENSP00000384273,ENSP00000387699,ENSP00000437955,ENSP00000444198,ENSP00000447173	CITED2,CREB1,CREBBP,EP300,HIF1A,MED1,MED12,MED13,MED25,MED28,MEF2A,RELA,SMAD3,STAT1,STAT3,TP53,VDR
GO:0051222	positive regulation of protein transport	4	365	0.0355	ENSP00000269305,ENSP00000300651,ENSP00000332973,ENSP00000437955	HIF1A,MED1,SMAD3,TP53
GO:1901215	negative regulation of neuron death	3	191	0.0368	ENSP00000264657,ENSP00000387699,ENSP00000437955	CREB1,HIF1A,STAT3
GO:0006979	response to oxidative stress	4	373	0.0376	ENSP00000269305,ENSP00000354394,ENSP00000384273,ENSP00000437955	HIF1A,RELA,STAT1,TP53
GO:0014823	response to activity	2	63	0.0378	ENSP00000387699,ENSP00000437955	CREB1,HIF1A
GO:0051707	response to other organism	6	835	0.0378	ENSP00000270800,ENSP00000290200,ENSP00000332973,ENSP00000354394,ENSP00000357907,ENSP00000384273	CDK19,IL10RB,IL22RA1,RELA,SMAD3,STAT1
GO:0030500	regulation of bone mineralization	2	66	0.0404	ENSP00000332973,ENSP00000437955	HIF1A,SMAD3
GO:2001233	regulation of apoptotic signaling pathway	4	388	0.0416	ENSP00000269305,ENSP00000332973,ENSP00000384273,ENSP00000437955	HIF1A,RELA,SMAD3,TP53
GO:0002088	lens development in camera-type eye	2	68	0.0423	ENSP00000300651,ENSP00000332973	MED1,SMAD3
GO:0048519	negative regulation of biological process	18	4953	0.0425	ENSP00000237380,ENSP00000262367,ENSP00000263253,ENSP00000264657,ENSP00000269305,ENSP00000296980,ENSP00000300651,ENSP00000326767,ENSP00000332973,ENSP00000346389,ENSP00000354394,ENSP00000363193,ENSP00000380888,ENSP00000384273,ENSP00000387699,ENSP00000437955,ENSP00000444198,ENSP00000447173	CITED2,CREB1,CREBBP,EP300,HIF1A,IL22RA2,MED1,MED12,MED13,MED25,MED28,MEF2A,RELA,SMAD3,STAT1,STAT3,TP53,VDR
GO:0031669	cellular response to nutrient levels	3	206	0.043	ENSP00000269305,ENSP00000385216,ENSP00000447173	NCOA1,TP53,VDR
GO:0040014	regulation of multicellular organism growth	2	69	0.0431	ENSP00000264657,ENSP00000387699	CREB1,STAT3
GO:0042509	regulation of tyrosine phosphorylation of STAT protein	2	70	0.0436	ENSP00000264657,ENSP00000296980	IL22RA2,STAT3
GO:0003006	developmental process involved in reproduction	5	622	0.0438	ENSP00000300651,ENSP00000385216,ENSP00000437955,ENSP00000444198,ENSP00000447173	CITED2,HIF1A,MED1,NCOA1,VDR
GO:0050776	regulation of immune response	6	873	0.0438	ENSP00000262367,ENSP00000263253,ENSP00000300651,ENSP00000332973,ENSP00000354394,ENSP00000384273	CREBBP,EP300,MED1,RELA,SMAD3,STAT1
GO:0000902	cell morphogenesis	5	626	0.0442	ENSP00000263253,ENSP00000300651,ENSP00000346389,ENSP00000387699,ENSP00000447173	CREB1,EP300,MED1,MEF2A,VDR
GO:0003151	outflow tract morphogenesis	2	71	0.0442	ENSP00000437955,ENSP00000444198	CITED2,HIF1A
GO:0030154	cell differentiation	14	3457	0.0442	ENSP00000263253,ENSP00000264657,ENSP00000265350,ENSP00000269305,ENSP00000300651,ENSP00000332973,ENSP00000346389,ENSP00000354394,ENSP00000363193,ENSP00000384273,ENSP00000385216,ENSP00000387699,ENSP00000437955,ENSP00000444198	CITED2,CREB1,EP300,HIF1A,MED1,MED12,MED20,MEF2A,NCOA1,RELA,SMAD3,STAT1,STAT3,TP53
GO:0030279	negative regulation of ossification	2	71	0.0442	ENSP00000332973,ENSP00000437955	HIF1A,SMAD3
GO:0046902	regulation of mitochondrial membrane permeability	2	71	0.0442	ENSP00000264657,ENSP00000269305	STAT3,TP53
GO:0003208	cardiac ventricle morphogenesis	2	72	0.0447	ENSP00000300651,ENSP00000437955	HIF1A,MED1
GO:0051090	regulation of DNA-binding transcription factor activity	4	403	0.0447	ENSP00000263253,ENSP00000332973,ENSP00000380888,ENSP00000384273	EP300,MED13,RELA,SMAD3
GO:0043627	response to estrogen	2	74	0.0463	ENSP00000263253,ENSP00000444198	CITED2,EP300
GO:0051050	positive regulation of transport	6	892	0.0465	ENSP00000269305,ENSP00000300651,ENSP00000332973,ENSP00000346389,ENSP00000387699,ENSP00000437955	CREB1,HIF1A,MED1,MEF2A,SMAD3,TP53
GO:0007492	endoderm development	2	76	0.0483	ENSP00000332973,ENSP00000363193	MED12,SMAD3
GO:0033143	regulation of intracellular steroid hormone receptor signaling pathway	2	76	0.0483	ENSP00000263253,ENSP00000300651	EP300,MED1
GO:0034599	cellular response to oxidative stress	3	222	0.0487	ENSP00000269305,ENSP00000384273,ENSP00000437955	HIF1A,RELA,TP53
GO:1903426	regulation of reactive oxygen species biosynthetic process	2	77	0.0491	ENSP00000264657,ENSP00000332973	SMAD3,STAT3
