# Supplementary material for: Functions of 1,25-dihydroxy vitamin D3, vitamin D3 receptor and interleukin-22 involved in pathogenesis of gout arthritis through altering metabolic pattern and inflammatory responses
Source: PeerJ journal article supplement (doi:10.7717/peerj.12585), 2021-12-01
Supplement: rawa.zip [file Metabolomic_data_origin.xls]

## Sheet: Sheet2
Peak	GA1	GA2	GA3	HC1	HC2	HC3
	GA	GA	GA	HC	HC	HC	GAvsHC_Log1.5FC	FDR	VIP
1,2-Cyclohexanedione	3.67e-08	2.85e-08	3.04e-08	1.23e-08	0.0237583	0.019991	-32.1453	0.549196	0.91247
1,5-Anhydroglucitol	3.67e-08	2.85e-08	3.04e-08	1.23e-08	1.27e-08	1.26e-08	2.30152	0.00098597	1.3446
10-Hydroxydecanoic acid	3.67e-08	2.85e-08	3.04e-08	1.23e-08	0.00184139	1.26e-08	-24.3322	0.619882	0.48684
1-Hexadecanol	3.67e-08	0.00473188	0.0309576	0.0107924	1.27e-08	1.26e-08	2.94973	0.746008	0.50523
1-Indanol	0.0132748	0.00755151	0.0116096	1.23e-08	1.27e-08	1.26e-08	33.7089	3.5394e-06	1.3624
1-Kestose	0.0390812	2.85e-08	3.04e-08	1.23e-08	1.27e-08	1.26e-08	34.1685	0.762845	0.69307
1-Monopalmitin	0.0171577	0.0180672	0.0135729	0.00906901	0.0150907	0.00229127	1.51029	0.698884	0.82426
2,3-Dihydroxypyridine	0.0240244	0.0093458	0.00922742	1.23e-08	1.27e-08	1.26e-08	34.381	2.2379e-05	1.3614
2,4,6-Trihydroxybenzophenone	3.67e-08	0.000416423	3.04e-08	1.23e-08	1.27e-08	1.26e-08	22.9678	0.814615	0.74712
2,6-Diaminopimelic acid	0.31865	0.279679	0.403293	0.0381787	0.0290563	0.0306607	5.73544	0.00069246	1.3536
21-hydroxypregnenolone	3.67e-08	0.00280692	0.00408023	1.23e-08	1.27e-08	1.26e-08	29.8871	0.843879	1.0246
24,25-dihydrolanosterol	3.67e-08	0.000965119	3.04e-08	0.00172596	1.27e-08	1.26e-08	-1.43349	0.669778	0.058971
2-Amino-2-norbornanecarboxylic acid	3.67e-08	2.85e-08	3.04e-08	0.00225124	0.00139557	0.0015785	-26.9045	5.6447e-06	1.3622
2-Amino-3-methyl-1-butanol	0.0139112	2.85e-08	3.04e-08	1.23e-08	1.27e-08	1.26e-08	31.621	0.805976	0.69927
2-aminophenol	3.67e-08	2.85e-08	0.00182555	0.000891166	0.000363799	0.00045695	0.158589	0.723635	0.86903
2-Butyne-1,4-diol	0.00315894	0.00209621	0.00218043	0.00234949	0.00222504	1.26e-08	1.19802	0.68641	0.61679
2-Deoxy-D-galactose	3.67e-08	2.85e-08	3.04e-08	1.23e-08	1.27e-08	1.26e-08	2.30152	0.00098597	1.3446
2-deoxy-D-glucose	3.67e-08	2.85e-08	3.04e-08	1.23e-08	0.00712825	0.0066087	-29.2884	0.563749	0.90764
2-Deoxyerythritol	1.62464	1.69784	1.33792	0.698869	0.564424	0.436042	2.48818	0.0091482	1.3043
2-Deoxytetronic acid	0.00475365	0.00332115	0.00356679	1.23e-08	0.00327596	0.0018876	2.00504	0.716902	0.65907
2-hydroxy-3-isopropylbutanedioic acid	0.00904981	0.0107352	0.00836614	0.00350966	0.00391812	0.0026686	2.52894	0.0055793	1.318
2-hydroxybutanoic acid	0.109166	0.112792	0.134684	0.186105	0.140555	0.0450062	-0.101766	0.722328	0.17584
2-Hydroxyestrone	3.67e-08	0.00494349	3.04e-08	1.23e-08	1.27e-08	1.26e-08	29.0694	0.837484	0.7208
2-hydroxypyridine	1.11975	0.630157	0.687837	0.744831	0.562437	0.582918	0.627422	0.721021	0.67849
2-ketoadipate	0.0299057	0.0258372	0.0276312	0.0202143	0.0206388	0.0215869	0.713085	0.011514	1.2968
2-ketobutyric acid	0.00259805	0.0015485	0.00129094	1.23e-08	1.27e-08	1.26e-08	29.3041	9.8219e-06	1.362
2-mercaptoethanesulfonic acid	3.67e-08	2.85e-08	3.04e-08	0.00126964	1.27e-08	0.00497289	-27.3433	0.585925	0.90233
2-Monoolein	3.67e-08	2.85e-08	3.04e-08	1.23e-08	1.27e-08	1.26e-08	2.30152	0.00098597	1.3446
2-Monopalmitin	3.67e-08	0.0311506	0.0244603	1.23e-08	0.0165283	0.00447689	2.40123	0.730069	0.12152
3,5-Dihydroxyphenylglycine	3.67e-08	2.85e-08	3.04e-08	1.23e-08	0.00121718	0.00101193	-24.8035	0.615724	0.89778
3,6-Anhydro-D-galactose	0.0804574	0.0157964	0.0171069	0.00446625	0.00437685	0.00288425	5.59519	0.795904	1.1927
3,7,12-Trihydroxycoprostane	3.67e-08	2.85e-08	3.04e-08	1.23e-08	1.27e-08	1.26e-08	2.30152	0.00098597	1.3446
3-Aminoisobutyric acid	0.02727	0.0380496	0.0507872	0.0176095	0.0131276	0.0095486	2.61063	0.040488	1.2302
3beta-Hydroxy-5beta-pregnane-20-one	0.00563212	0.00259201	0.00322681	0.001617	0.00151673	1.26e-08	3.19596	0.752938	0.70614
3-Cyanoalanine	3.67e-08	0.00408696	0.00371091	1.23e-08	1.27e-08	1.26e-08	30.1934	0.836037	1.0241
3-Hydroxyanthranilic acid	0.0281915	0.0249609	0.0292652	0.0170687	1.27e-08	0.00731875	3.00329	0.74878	0.69896
3-hydroxybutyric acid	0.963825	1.847	1.58754	1.18224	0.267345	0.173788	2.45823	0.730762	0.99619
3-Hydroxynorvaline	3.67e-08	0.00610481	0.00537037	1.23e-08	1.27e-08	1.26e-08	31.1462	0.815125	1.0223
3-Hydroxypropionic acid	3.67e-08	2.85e-08	3.04e-08	0.00240104	1.27e-08	0.00204109	-26.5041	0.594934	0.90399
3-Indolepyruvic acid	0.0668186	0.0979331	0.0955166	0.031381	0.0273022	0.0461818	2.24193	0.030784	1.2499
3-Methylamino-1,2-propanediol	0.00382496	2.85e-08	0.00584287	0.0159458	0.0186877	0.013276	-3.94739	0.644137	0.7429
3-Methylglutaric Acid	0.0203485	0.0181253	3.04e-08	0.00456812	1.27e-08	1.26e-08	5.25537	0.791053	0.55633
3-Phenyllactic acid	0.0310213	0.00755687	0.0141812	0.00890806	0.00794067	0.00440962	2.24183	0.724525	0.88383
4-hydroxy-3-methoxybenzoic acid;	3.67e-08	2.85e-08	3.04e-08	1.23e-08	1.27e-08	1.26e-08	2.30148	0.718407	0.582
4-Hydroxy-6-methyl-2-pyrone	0.0767357	0.0514631	0.0565314	0.0448794	0.0609503	0.0422804	0.544904	0.7171	0.75264
4-hydroxybutyrate	0.245168	2.85e-08	0.0939478	0.119489	0.14769	0.128126	-0.378127	0.715793	0.59492
4-hydroxycinnamic acid	3.67e-08	2.85e-08	3.04e-08	0.00424954	0.00428118	1.26e-08	-28.1133	0.576223	0.90687
4-hydroxyphenylacetic acid	3.67e-08	2.85e-08	3.04e-08	0.00453751	0.00413957	0.0018793	-28.6389	3.1337e-05	1.3611
4-HYDROXYPYRIDINE	0.0388363	0.0258054	0.0293034	0.025241	0.0217536	0.0189723	0.871977	0.714486	1.0402
5-Aminovaleric acid 2	3.67e-08	2.85e-08	3.04e-08	1.23e-08	1.27e-08	1.26e-08	2.30152	0.00098597	1.3446
5-Methylresorcinol	0.020236	0.0257684	0.0265143	0.00352771	0.00251839	0.0026191	5.23975	0.00096863	1.3517
6-phosphogluconic acid	0.473509	0.695473	0.659143	1.23e-08	0.864841	1.26e-08	1.846	0.713437	0.94866
9-Fluorenone 2	3.67e-08	2.85e-08	3.04e-08	0.00149773	0.00258202	1.26e-08	-26.2942	0.59632	0.90246
A1	3.67e-08	2.85e-08	3.04e-08	0.00635768	0.00659268	0.00656675	-30.1546	8.5604e-07	1.3627
A10	3.67e-08	2.85e-08	3.04e-08	1.23e-08	1.27e-08	1.26e-08	2.30152	0.00098597	1.3446
A100	0.021061	0.0293757	0.0271419	0.0053112	0.00646774	0.00441023	3.86457	0.0016828	1.3388
A101	0.617862	0.459684	0.453377	0.299921	0.202274	0.152345	2.09557	0.047808	1.2175
A103	0.00705614	0.00419299	0.0058785	1.23e-08	1.27e-08	1.26e-08	32.1339	2.9767e-06	1.3624
A104	0.00304727	0.00252778	0.00282946	0.000851167	0.000623988	0.000579069	3.47468	0.0014517	1.3406
A106	3.67e-08	0.00472221	3.04e-08	1.23e-08	1.27e-08	1.26e-08	28.9563	0.835405	0.7212
A107	0.014371	0.00491329	0.00575126	1.23e-08	1.27e-08	1.26e-08	33.0702	3.1385e-05	1.3611
A108	3.67e-08	0.00779894	0.0061811	1.23e-08	1.27e-08	1.26e-08	31.6331	0.804669	1.0215
A11	3.67e-08	2.85e-08	3.04e-08	1.23e-08	1.27e-08	1.26e-08	2.30152	0.00098597	1.3446
A111	0.0251546	0.00878576	0.00988698	0.00596668	1.27e-08	1.26e-08	4.91796	0.784123	1.0026
A114	0.0066249	0.0123225	0.00780857	0.0020443	0.000134742	0.000209893	5.95838	0.801448	1.1911
A115	0.041868	2.85e-08	0.0383068	1.23e-08	1.27e-08	1.26e-08	35.9407	0.741933	1.0029
A116	0.182532	0.106382	0.143625	0.0421821	0.0289364	0.0199912	3.84151	0.013263	1.2914
A117	0.00618456	0.00288586	0.00362157	0.00180932	0.00293235	0.00426113	0.847013	0.709258	0.63058
A118	0.0185805	0.0136592	0.0129027	0.0172727	0.0133714	0.0161226	-0.0871841	0.707951	0.21099
A119	3.67e-08	2.85e-08	3.04e-08	1.23e-08	1.27e-08	0.0041823	-26.3554	0.595627	0.4957
A12	0.0407306	2.85e-08	0.0354069	0.0221091	0.0212423	0.0267235	0.204647	0.706644	0.55687
A120	0.0167868	0.00668244	0.00679961	1.23e-08	1.27e-08	1.26e-08	33.5383	2.1832e-05	1.3614
Abietic Acid	3.67e-08	0.0250922	0.0269777	0.013679	0.0192091	1.26e-08	1.13314	0.684331	0.070339
Acetol	3.67e-08	0.0204073	3.04e-08	0.0513526	0.0261274	0.0443826	-4.40731	0.642058	0.99648
Aconitic Acid	3.67e-08	2.85e-08	3.04e-08	1.23e-08	0.00933831	0.0084945	-29.932	0.56167	0.90881
adenosine	0.0629229	0.0597722	0.0948594	0.00612497	0.0116442	0.00207141	5.90608	0.024446	1.2636
Adenosine 5-monophosphate	3.67e-08	0.0147718	0.0251737	1.23e-08	1.27e-08	1.26e-08	34.2225	0.760231	1.0172
Adipamide	3.67e-08	2.85e-08	3.04e-08	0.00310729	0.00259396	0.00142421	-27.6694	2.0683e-05	1.3615
Adrenosterone	3.67e-08	2.85e-08	3.04e-08	1.23e-08	1.27e-08	1.26e-08	2.30152	0.00098597	1.3446
alanine	10.384	7.33199	7.74278	4.09752	4.8045	4.76172	1.53477	0.022064	1.2693
allose	2.17025	0.620399	0.575229	0.281789	0.275086	0.224615	3.6014	0.764026	1.1216
Allylmalonic acid	3.67e-08	2.85e-08	3.04e-08	1.23e-08	1.27e-08	1.26e-08	2.30152	0.00098597	1.3446
alpha-Aminoadipic acid	0.00910865	0.00979645	0.0952752	1.23e-08	0.0292531	1.26e-08	3.3586	0.757789	0.93939
alpha-D-glucosamine 1-phosphate	0.734183	0.134236	0.0968388	0.0086176	0.00887992	0.00401108	9.38169	0.022676	1.2679
alpha-Ecdysone	0.0129095	2.85e-08	0.00768833	0.0100035	1.27e-08	0.000675764	1.62011	0.701656	0.13283
alpha-ketoisocaproic acid	0.0189436	0.0155318	0.0167385	1.23e-08	0.00605617	0.00670095	3.42795	0.760561	0.71135
alpha-Santonin	3.67e-08	2.85e-08	3.04e-08	1.23e-08	1.27e-08	1.26e-08	2.30152	0.00098597	1.3446
alpha-Tocopherol	0.0792147	0.0401605	0.0377411	0.0351104	0.0384933	0.0149168	1.41503	0.691954	0.83439
Aminomalonic acid	0.758001	0.882682	0.91956	0.168049	0.154609	0.237866	3.74629	0.0016233	1.3393
Aminooxyacetic acid	3.67e-08	2.85e-08	0.00643814	1.23e-08	1.27e-08	1.26e-08	29.7208	0.846493	0.71494
Analyte 358	3.67e-08	0.00408842	0.00442961	1.23e-08	1.27e-08	1.26e-08	30.4112	0.826888	1.0237
Analyte 36	3.67e-08	0.174844	0.0487948	0.0299252	0.00853644	1.26e-08	4.34161	0.779965	0.15172
Analyte 362	3.67e-08	2.85e-08	3.04e-08	0.00231418	0.00125929	0.00222195	-27.1599	1.2022e-05	1.3618
Analyte 364	3.67e-08	2.85e-08	3.04e-08	1.23e-08	1.27e-08	1.26e-08	2.30152	0.00098597	1.3446
Analyte 366	0.0109113	0.0102295	0.0113268	0.0145528	0.0156831	0.0119043	-0.643115	0.628224	1.1236
Analyte 369	3.67e-08	2.85e-08	3.04e-08	1.23e-08	0.000338482	1.26e-08	-20.1549	0.634435	0.46497
Analyte 37	3.67e-08	2.85e-08	3.04e-08	0.00374481	1.27e-08	1.26e-08	-26.083	0.601171	0.4961
Analyte 370	0.0141627	0.0114233	0.0136017	1.23e-08	1.27e-08	1.26e-08	34.1752	5.4523e-07	1.3628
Analyte 371	3.67e-08	2.85e-08	3.04e-08	1.23e-08	1.27e-08	0.000452423	-20.8705	0.633742	0.46983
Analyte 372	0.00487178	0.00431016	0.00362349	0.00194105	1.27e-08	0.00130124	3.38769	0.759175	0.72224
Analyte 377	0.068221	0.0652576	0.0466639	0.0209104	0.0113405	0.0116214	3.48359	0.011514	1.2966
Analyte 38	0.000961078	2.85e-08	3.04e-08	0.00109457	0.00103856	0.000798272	-2.75019	0.649681	0.96397
Analyte 380	3.67e-08	2.85e-08	3.04e-08	1.23e-08	0.000895242	1.26e-08	-22.5537	0.629584	0.47839
Analyte 382	3.67e-08	2.85e-08	3.04e-08	0.00208219	0.00187393	0.00132064	-26.9287	5.4669e-06	1.3623
Analyte 387	3.67e-08	0.00212871	0.00249606	1.23e-08	1.27e-08	1.26e-08	28.9049	0.834019	1.0267
Analyte 388	0.0032669	2.85e-08	3.04e-08	1.23e-08	1.27e-08	1.26e-08	28.0477	0.826396	0.7097
Analyte 389	3.67e-08	0.0028118	0.00349997	0.0055418	0.00317145	0.00307056	-1.53974	0.667006	0.6324
Analyte 39	3.67e-08	0.00190213	0.00178295	1.23e-08	1.27e-08	1.26e-08	28.3447	0.829861	1.0279
Analyte 393	0.0168122	0.00756328	3.04e-08	0.00181268	0.00330298	0.00299507	2.71386	0.733534	0.42518
Analyte 394	3.67e-08	2.85e-08	3.04e-08	1.23e-08	1.27e-08	1.26e-08	2.30152	0.00098597	1.3446
Analyte 396	0.0173591	0.00985702	0.0101615	0.00601288	0.00534726	0.00300953	2.35772	0.727297	1.176
Analyte 398	3.67e-08	2.85e-08	3.04e-08	1.23e-08	1.27e-08	1.26e-08	2.30152	0.00098597	1.3446
Analyte 4	3.67e-08	2.85e-08	3.04e-08	1.23e-08	1.27e-08	1.26e-08	2.30152	0.00098597	1.3446
Analyte 40	0.172668	0.0914791	0.0980574	0.145882	0.132381	0.131326	-0.303225	0.626917	0.50929
Analyte 400	3.67e-08	2.85e-08	0.00196839	1.23e-08	1.27e-08	1.26e-08	26.7983	0.822238	0.72535
Analyte 401	0.00350369	0.00360872	0.00422948	1.23e-08	0.000638677	0.000716853	5.23919	0.79036	0.80775
Analyte 403	3.67e-08	2.85e-08	3.04e-08	0.00476061	0.00594262	0.00550298	-29.6961	1.2544e-06	1.3626
Analyte 41	3.67e-08	2.85e-08	3.04e-08	1.23e-08	1.27e-08	1.26e-08	2.30152	0.00098597	1.3446
Analyte 412	3.67e-08	2.85e-08	3.04e-08	0.000860347	1.27e-08	1.26e-08	-22.4557	0.630277	0.48009
Analyte 415	3.67e-08	2.85e-08	3.04e-08	1.23e-08	1.27e-08	1.26e-08	2.30152	0.00098597	1.3446
Analyte 416	3.67e-08	2.85e-08	3.04e-08	0.00616944	0.00181855	0.00142343	-28.3557	0.00017528	1.3583
Analyte 42	3.67e-08	0.00332954	3.04e-08	1.23e-08	1.27e-08	1.26e-08	28.0945	0.828475	0.72431
Analyte 68	3.67e-08	2.85e-08	3.04e-08	1.23e-08	1.27e-08	1.26e-08	2.30152	0.00098597	1.3446
Analyte 691	3.67e-08	2.85e-08	3.04e-08	0.00155295	0.00162658	1.26e-08	-25.6794	0.603943	0.90165
Analyte 7	3.67e-08	2.85e-08	3.04e-08	0.004478	0.00298714	0.00918142	-29.7622	4.6591e-05	1.3607
Analyte 70	0.00810302	0.00381271	0.00506365	1.23e-08	1.27e-08	1.26e-08	32.1125	8.5548e-06	1.362
Analyte 708	3.67e-08	2.85e-08	3.04e-08	1.23e-08	1.27e-08	1.26e-08	2.30152	0.00098597	1.3446
Analyte 71	3.67e-08	2.85e-08	3.04e-08	0.0267186	0.0195166	0.0247358	-33.3386	1.5149e-06	1.3626
Analyte 711	0.0507539	2.85e-08	0.00683514	1.23e-08	1.27e-08	1.26e-08	35.1247	0.747161	1.0012
Analyte 716	3.67e-08	2.85e-08	3.04e-08	0.0357716	0.0516049	0.0531713	-35.0237	2.271e-06	1.3625
Analyte 717	0.071038	2.85e-08	0.0230499	0.117663	0.116502	0.0807471	-2.97941	0.648295	0.69925
Analyte 72	0.128615	0.071077	0.0777683	0.105397	0.0966575	0.11484	-0.327751	0.607312	0.54299
Analyte 728	1.24543	0.29071	3.04e-08	0.195145	0.247593	0.238202	2.00646	0.717595	0.51838
Analyte 73	0.00483949	0.00454204	0.00512089	1.23e-08	1.27e-08	1.26e-08	31.7236	1.8628e-07	1.3628
Analyte 732	3.67e-08	2.85e-08	3.04e-08	1.23e-08	1.27e-08	1.26e-08	2.30152	0.00098597	1.3446
Analyte 734	0.0940131	0.026369	0.0253667	1.23e-08	0.0274482	0.0179877	2.87469	0.739078	0.66424
Analyte 737	3.67e-08	2.85e-08	3.04e-08	1.23e-08	1.27e-08	0.000939494	-22.6727	0.628891	0.47953
Analyte 738	3.67e-08	2.85e-08	3.04e-08	0.0133302	1.27e-08	1.26e-08	-29.2143	0.565828	0.50706
Analyte 74	0.0134123	0.00769358	0.00854471	1.23e-08	0.0112132	0.0134018	0.459037	0.606005	0.58269
Analyte 742	3.67e-08	2.85e-08	3.04e-08	1.23e-08	0.00263948	1.26e-08	-25.2202	0.609487	0.49067
Analyte 743	3.67e-08	2.85e-08	3.04e-08	1.23e-08	0.0180521	0.0132842	-31.3223	0.551968	0.91106
Analyte 75	0.0241261	0.0142537	0.0152963	1.23e-08	1.27e-08	1.26e-08	34.9512	2.9767e-06	1.3625
Analyte 756	0.182696	0.0297711	0.0387355	0.0527814	0.0906752	0.0860412	0.222869	0.604698	0.25281
Analyte 767	3.67e-08	2.85e-08	3.04e-08	0.00332528	0.00360543	0.00135439	-28.0413	4.8877e-05	1.3606
Analyte 77	3.67e-08	2.85e-08	3.04e-08	1.23e-08	1.27e-08	1.26e-08	2.30152	0.00098597	1.3446
Analyte 770	3.67e-08	2.85e-08	3.04e-08	0.0166459	0.0113341	0.00491942	-31.4424	5.1775e-05	1.3605
Analyte 778	0.100619	0.0604405	3.04e-08	1.23e-08	0.0686755	0.0423932	0.916533	0.603391	0.052506
Analyte 78	0.0165326	0.00997321	0.0125665	0.0420098	0.0306969	0.0248295	-2.25622	0.037078	1.2366
Analyte 787	3.67e-08	2.85e-08	3.04e-08	1.23e-08	1.27e-08	1.26e-08	2.30152	0.00098597	1.3446
Analyte 8	3.67e-08	2.85e-08	3.04e-08	0.154272	0.161018	0.127513	-37.8539	9.0679e-07	1.3627
Analyte 803	3.67e-08	2.85e-08	3.04e-08	1.23e-08	1.27e-08	1.26e-08	2.30152	0.00098597	1.3446
Analyte 807	3.67e-08	0.00193922	0.001435	0.0020149	0.000521552	1.26e-08	0.703893	0.602084	0.088795
Analyte 81	0.0352921	0.0359261	0.0377784	0.00342473	0.00916124	0.0110884	3.76586	0.032587	1.2455
Analyte 811	0.00305446	0.00299752	3.04e-08	1.23e-08	1.27e-08	1.26e-08	29.5683	0.845107	1.0147
Analyte 812	3.67e-08	2.85e-08	3.04e-08	0.00486746	0.00301058	0.00248018	-28.5921	1.1067e-05	1.3619
Analyte 816	0.00862593	0.00811591	3.04e-08	0.01336	0.00357539	1.26e-08	-0.0283474	0.600777	0.047078
Analyte 82	3.67e-08	2.85e-08	3.04e-08	1.23e-08	0.00286909	0.00264939	-27.0391	0.588697	0.90312
Analyte 821	0.0449128	0.0484429	0.0410026	0.0172912	1.27e-08	1.26e-08	5.05668	0.787588	1.0087
Analyte 824	3.67e-08	2.85e-08	3.04e-08	1.23e-08	1.27e-08	1.26e-08	2.30152	0.00098597	1.3446
Analyte 825	0.62232	0.111849	0.120805	1.23e-08	0.02749	0.0438578	6.12504	0.804913	0.76168
Analyte 826	0.00117543	0.0013698	3.04e-08	1.23e-08	0.00362141	0.0031672	-2.41948	0.653839	0.043958
Analyte 827	0.00928999	2.85e-08	3.04e-08	0.00690355	0.00582144	0.00580922	-1.7034	0.663541	0.93926
Analyte 83	3.67e-08	0.00223337	0.00204988	1.23e-08	1.27e-08	1.26e-08	28.7158	0.832633	1.0271
Analyte 830	0.0256893	0.0479381	0.0226106	1.23e-08	0.00865559	0.00285921	5.23641	0.789667	0.78677
Analyte 842	3.67e-08	2.85e-08	3.04e-08	1.23e-08	1.27e-08	1.26e-08	2.30152	0.00098597	1.3446
Analyte 85	2.72e-05	2.85e-08	3.04e-08	0.00133797	1.27e-08	1.26e-08	-9.60266	0.638593	0.11176
Analyte 851	3.67e-08	2.85e-08	0.00741386	1.23e-08	1.27e-08	1.26e-08	30.0689	0.841265	0.71382
Analyte 852	0.0645338	0.0900003	3.04e-08	1.23e-08	1.27e-08	1.26e-08	37.5591	0.735398	1.0041
Analyte 853	3.67e-08	2.85e-08	3.04e-08	1.23e-08	1.27e-08	1.26e-08	2.30152	0.00098597	1.3446
Analyte 856	0.0121807	0.0162651	0.0533772	0.00604034	0.00483213	0.00815857	3.59704	0.763333	1.088
Analyte 857	0.00697975	0.0130802	0.0131954	1.23e-08	1.27e-08	1.26e-08	33.7704	6.219e-06	1.3622
Analyte 858	3.67e-08	2.85e-08	3.04e-08	1.23e-08	1.27e-08	1.26e-08	2.30152	0.00098597	1.3446
Analyte 860	3.67e-08	2.85e-08	3.04e-08	1.23e-08	1.27e-08	1.26e-08	2.30152	0.00098597	1.3446
Analyte 865	3.67e-08	2.85e-08	3.04e-08	1.23e-08	1.27e-08	0.00354043	-25.9445	0.60325	0.4941
Analyte 867	3.67e-08	2.85e-08	3.04e-08	0.00755233	1.27e-08	1.26e-08	-27.813	0.581074	0.50243
Analyte 875	0.0241261	0.0142537	0.0152963	1.23e-08	1.27e-08	1.26e-08	34.9512	2.9767e-06	1.3625
Analyte 883	0.182696	0.0297711	0.0387355	0.0527814	0.0906752	0.0860412	0.222869	0.604698	0.25281
Analyte 884	3.67e-08	2.85e-08	3.04e-08	0.00332528	0.00360543	0.00135439	-28.0413	4.8877e-05	1.3606
Analyte 889	3.67e-08	2.85e-08	3.04e-08	1.23e-08	1.27e-08	1.26e-08	2.30152	0.00098597	1.3446
Analyte 89	3.67e-08	2.85e-08	3.04e-08	0.0166459	0.0113341	0.00491942	-31.4424	5.1775e-05	1.3605
Analyte 890	0.100619	0.0604405	3.04e-08	1.23e-08	0.0686755	0.0423932	0.916533	0.603391	0.052506
Analyte 891	0.0165326	0.00997321	0.0125665	0.0420098	0.0306969	0.0248295	-2.25622	0.037078	1.2366
Analyte 892	3.67e-08	2.85e-08	3.04e-08	1.23e-08	1.27e-08	1.26e-08	2.30152	0.00098597	1.3446
Analyte 893	3.67e-08	2.85e-08	3.04e-08	0.154272	0.161018	0.127513	-37.8539	9.0679e-07	1.3627
Analyte 894	3.67e-08	2.85e-08	3.04e-08	1.23e-08	1.27e-08	1.26e-08	2.30152	0.00098597	1.3446
Analyte 895	3.67e-08	0.00193922	0.001435	0.0020149	0.000521552	1.26e-08	0.703893	0.602084	0.088795
Analyte 9	0.0352921	0.0359261	0.0377784	0.00342473	0.00916124	0.0110884	3.76586	0.032587	1.2455
Analyte 903	0.00305446	0.00299752	3.04e-08	1.23e-08	1.27e-08	1.26e-08	29.5683	0.845107	1.0147
Analyte 904	3.67e-08	2.85e-08	3.04e-08	0.00486746	0.00301058	0.00248018	-28.5921	1.1067e-05	1.3619
Analyte 905	0.00862593	0.00811591	3.04e-08	0.01336	0.00357539	1.26e-08	-0.0283474	0.600777	0.047078
Analyte 907	3.67e-08	2.85e-08	3.04e-08	1.23e-08	0.00286909	0.00264939	-27.0391	0.588697	0.90312
Analyte 908	0.0449128	0.0484429	0.0410026	0.0172912	1.27e-08	1.26e-08	5.05668	0.787588	1.0087
Analyte 91	3.67e-08	2.85e-08	3.04e-08	1.23e-08	1.27e-08	1.26e-08	2.30152	0.00098597	1.3446
Analyte 910	0.62232	0.111849	0.120805	1.23e-08	0.02749	0.0438578	6.12504	0.804913	0.76168
Analyte 911	0.00117543	0.0013698	3.04e-08	1.23e-08	0.00362141	0.0031672	-2.41948	0.653839	0.043958
Analyte 912	0.00928999	2.85e-08	3.04e-08	0.00690355	0.00582144	0.00580922	-1.7034	0.663541	0.93926
Analyte 913	3.67e-08	0.00223337	0.00204988	1.23e-08	1.27e-08	1.26e-08	28.7158	0.832633	1.0271
Analyte 914	0.0256893	0.0479381	0.0226106	1.23e-08	0.00865559	0.00285921	5.23641	0.789667	0.78677
Analyte 92	3.67e-08	2.85e-08	3.04e-08	1.23e-08	1.27e-08	1.26e-08	2.30152	0.00098597	1.3446
Analyte 920	2.72e-05	2.85e-08	3.04e-08	0.00133797	1.27e-08	1.26e-08	-9.60266	0.638593	0.11176
Analyte 921	3.67e-08	2.85e-08	0.00741386	1.23e-08	1.27e-08	1.26e-08	30.0689	0.841265	0.71382
Analyte 922	0.0645338	0.0900003	3.04e-08	1.23e-08	1.27e-08	1.26e-08	37.5591	0.735398	1.0041
Analyte 929	3.67e-08	2.85e-08	3.04e-08	1.23e-08	1.27e-08	1.26e-08	2.30152	0.00098597	1.3446
Analyte 934	0.0121807	0.0162651	0.0533772	0.00604034	0.00483213	0.00815857	3.59704	0.763333	1.088
Analyte 935	0.00697975	0.0130802	0.0131954	1.23e-08	1.27e-08	1.26e-08	33.7704	6.219e-06	1.3622
Analyte 936	3.67e-08	2.85e-08	3.04e-08	1.23e-08	1.27e-08	1.26e-08	2.30152	0.00098597	1.3446
Analyte 943	3.67e-08	2.85e-08	0.00196715	1.23e-08	0.000155006	1.26e-08	6.26622	0.806299	0.20652
Analyte 948	0.0589651	0.0122353	0.00877376	0.000995284	0.00321845	0.00134951	6.57391	0.806992	1.1872
Analyte 957	3.67e-08	2.85e-08	3.04e-08	1.23e-08	1.27e-08	1.26e-08	2.30152	0.00098597	1.3446
Analyte 968	0.0178834	0.00991539	0.00994017	0.00566364	0.00882299	0.00594073	1.5139	0.699577	1.0576
Analyte 969	3.67e-08	2.85e-08	3.04e-08	1.23e-08	1.27e-08	1.26e-08	2.30152	0.00098597	1.3446
Analyte 979	3.67e-08	0.010557	0.0237962	1.23e-08	1.27e-08	1.26e-08	33.8505	0.76938	1.0175
Analyte 985	3.67e-08	2.85e-08	3.04e-08	1.23e-08	1.27e-08	1.26e-08	2.30152	0.00098597	1.3446
Analyte 99	3.67e-08	2.85e-08	3.04e-08	0.00793147	0.00511602	0.0106342	-30.6316	1.0673e-05	1.3619
Analyte 990	3.67e-08	2.85e-08	3.04e-08	1.23e-08	1.27e-08	1.26e-08	2.30152	0.00098597	1.3446
androsterone	0.443461	0.330145	0.26893	0.260733	0.369152	0.0469723	1.06539	0.683638	0.65855
Arachidic acid	3.67e-08	2.85e-08	3.04e-08	0.0154373	0.0437579	0.0287473	-33.8673	2.2379e-05	1.3614
arachidonic acid	0.32762	0.361469	0.330331	0.190118	0.136914	1.26e-08	2.80403	0.736306	0.67317
ascorbate	0.38262	0.158841	0.116365	0.0173676	0.0555837	0.045626	4.22572	0.777193	1.1697
asparagine	0.0693928	0.0930129	0.0729298	0.0115943	0.00790391	0.0054289	5.53698	0.0023297	1.3344
aspartic acid	1.37615	1.34237	1.12539	0.242307	0.109053	0.0877617	5.35059	0.006766	1.313
Atropine	3.67e-08	2.85e-08	3.04e-08	1.23e-08	1.27e-08	1.26e-08	2.30152	0.00098597	1.3446
azelaic acid	3.67e-08	2.85e-08	3.04e-08	0.00176765	0.00313168	0.00185727	-27.5384	9.8219e-06	1.362
Behenic acid	3.67e-08	2.85e-08	0.00498312	0.00366815	1.27e-08	0.00331054	-0.830633	0.594242	0.3886
benzoic acid	0.00852637	0.00762508	0.00795691	0.0107343	1.27e-08	1.26e-08	1.9955	0.716209	0.94789
Benzyl thiocyanate	3.67e-08	0.00407852	0.00445269	1.23e-08	1.27e-08	1.26e-08	30.4151	0.825581	1.0237
beta-Alanine	0.273254	0.374856	0.365829	0.100425	0.0674695	0.0382549	3.92883	0.016482	1.2825
beta-Glutamic acid	0.00440926	0.0129052	0.00962663	0.00148069	0.000800974	0.00085424	5.30437	0.016257	1.2832
beta-Glycerophosphoric acid	3.67e-08	2.85e-08	3.04e-08	0.256755	1.27e-08	1.26e-08	-36.5098	0.543652	0.52589
beta-Hydroxymyristic acid	3.67e-08	0.337534	0.194154	0.0443373	0.0405838	0.00761253	4.3123	0.778579	0.35847
beta-Mannosylglycerate	0.0539024	0.0310171	0.033068	0.016214	0.0182468	0.0152334	2.13262	0.031052	1.249
biotin	3.67e-08	0.00668021	3.04e-08	1.23e-08	1.27e-08	1.26e-08	29.8119	0.845186	0.71826
Biuret	0.0641307	0.039692	0.0428526	0.0319111	0.0425238	0.0284798	0.873864	0.592935	0.91548
canavanine degr prod	3.67e-08	2.85e-08	3.04e-08	0.00245835	0.00291697	0.00207747	-27.7803	2.6271e-06	1.3625
caprylic acid	0.0104473	2.85e-08	3.04e-08	1.23e-08	0.00549888	0.0062892	-0.297793	0.591628	0.38469
Carbobenzyloxy-L-leucine degr1	0.0254305	0.010325	0.0118537	0.0123961	0.0158812	0.0167673	0.136565	0.590321	0.045196
Carnitine	3.67e-08	2.85e-08	3.04e-08	1.23e-08	1.27e-08	1.26e-08	2.30152	0.00098597	1.3446
cellobiose	3.67e-08	2.85e-08	3.04e-08	1.23e-08	1.27e-08	1.26e-08	2.30152	0.00098597	1.3446
Cellobiotol	3.67e-08	2.85e-08	3.04e-08	1.23e-08	1.27e-08	1.26e-08	2.30152	0.00098597	1.3446
Cerotinic acid	0.356676	0.250007	0.222317	0.127782	0.0486114	0.0340487	3.38131	0.758482	1.1917
cholecalciferol	0.0990005	0.0681159	0.0613763	0.0449687	0.0160372	0.0110509	2.84623	0.738385	1.1298
Cholestane-3,5,6-triol, (3?5?6?-	0.270404	0.16708	0.180779	0.268738	0.337022	0.314836	-0.981858	0.589014	0.5505
cis-gondoic acid	0.00202094	0.00167968	3.04e-08	0.00265088	0.00265035	1.26e-08	-0.886468	0.587707	0.0062602
cis-Phytol	3.67e-08	0.000319029	3.04e-08	0.00811993	0.00315644	1.26e-08	-8.79228	0.639286	0.54141
Citraconic acid	0.00552321	0.00374614	0.00416654	0.00479687	0.00470564	0.00409319	-0.0291631	0.5864	0.12422
citrulline	0.109644	0.0703305	0.0755357	0.0577016	0.0847082	0.0512165	0.683987	0.585093	0.77157
cortisone	0.00683481	0.0129583	3.04e-08	0.00548393	0.00283187	0.00215793	1.56973	0.700963	0.47487
creatine	3.67e-08	0.206722	3.04e-08	0.0450332	1.27e-08	0.0192131	2.88221	0.740464	0.33202
creatine degr	3.67e-08	2.85e-08	3.04e-08	1.23e-08	0.000626792	1.26e-08	-21.6744	0.632356	0.47377
cyclic-GMP	0.0377115	0.0163722	3.04e-08	1.23e-08	1.27e-08	1.26e-08	34.9698	0.748468	1.0067
cyclohexane-1,2-diol	4.82822	3.40206	4.23042	3.0796	2.38514	1.84764	1.31463	0.689875	1.138
cycloleucine	0.0191292	0.0340832	0.0381844	0.0150874	0.0142796	0.0065247	2.3053	0.725218	1.1058
Cysteinylglycine	0.018799	0.0183712	0.0174122	0.0104246	0.00719685	0.00779007	1.88547	0.0084593	1.3069
cystine	3.67e-08	0.0199081	3.04e-08	1.23e-08	1.27e-08	1.26e-08	32.505	0.791599	0.70996
cytidine	3.67e-08	2.85e-08	3.04e-08	1.23e-08	1.27e-08	1.26e-08	2.30152	0.00098597	1.3446
cytidine-monophosphate	0.0201922	0.0108021	0.0115198	0.0102763	0.00532549	0.00593883	1.67686	0.705121	1.0466
cytidine-monophosphate degr prod	3.67e-08	2.85e-08	3.04e-08	1.23e-08	1.27e-08	1.26e-08	2.30152	0.00098597	1.3446
D-(glycerol 1-phosphate)	4.12717	4.40604	4.8852	1.64238	1.02271	1.25188	3.03679	0.583786	0.519
D-alanyl-D-alanine	0.0247857	0.0258112	3.04e-08	0.0142813	1.27e-08	1.26e-08	3.11974	0.750859	0.51611
D-Altrose	0.0196788	0.00946288	0.0123511	0.0132786	1.27e-08	1.26e-08	2.81003	0.736999	0.96284
D-Arabitol	3.67e-08	2.85e-08	3.04e-08	1.23e-08	1.27e-08	1.26e-08	2.30152	0.00098597	1.3446
Dehydroabietic Acid	3.67e-08	0.0213591	3.04e-08	0.0145611	0.0146357	1.26e-08	-0.770903	0.582479	0.39273
Dehydroascorbic Acid	0.0960551	0.0588799	0.0444783	1.23e-08	1.27e-08	1.26e-08	38.1879	5.5401e-06	1.3622
Dehydroepiandrosterone	0.00765716	0.00531507	0.00488111	0.00491521	0.00353505	0.00201851	1.31651	0.690568	0.95507
D-erythronolactone	3.67e-08	2.85e-08	3.04e-08	1.23e-08	0.000710816	0.000578953	-23.4541	0.626119	0.8941
D-erythro-sphingosine	0.0679726	0.0451231	0.0423001	0.0102802	0.0335052	0.0366173	1.62509	0.702349	0.90715
D-galacturonic acid	0.329196	0.161051	0.118172	0.0292299	0.0182223	0.0209511	5.38997	0.010728	1.2992
d-Glucoheptose	3.67e-08	2.85e-08	0.0714633	0.0383907	0.0290772	0.0144454	-0.336594	0.581172	0.90692
D-Glyceric acid	0.017671	0.00625463	0.00662442	0.00526725	0.0029332	1.26e-08	3.24362	0.755017	0.69775
Diglycerol	3.67e-08	2.85e-08	3.04e-08	1.23e-08	0.0109902	1.26e-08	-28.7382	0.572065	0.50375
Dihydroxyacetone	0.0352071	0.0167153	0.0268746	1.23e-08	0.0202602	0.0200171	1.65515	0.703735	0.63117
DL-Anabasine	3.67e-08	0.00334349	0.00322598	0.00229251	1.27e-08	1.26e-08	2.59647	0.732148	0.52511
Dodecanol	0.01998	0.013894	0.0162091	0.0112412	0.0100108	0.00980301	1.17867	0.042589	1.2264
D-Talose	3.67e-08	2.85e-08	3.04e-08	1.23e-08	1.27e-08	1.26e-08	2.30152	0.00098597	1.3446
Elaidic acid	0.0158572	2.85e-08	0.0195217	1.23e-08	0.0199533	0.013014	0.174119	0.579865	0.035609
Epigallocatechin	3.67e-08	0.00227288	0.00473923	1.23e-08	1.27e-08	1.26e-08	29.9314	0.842572	1.0242
epsilon-Caprolactam	3.67e-08	2.85e-08	3.04e-08	1.23e-08	0.00672284	1.26e-08	-27.5261	0.583846	0.49958
Ergosterol	3.67e-08	2.85e-08	3.04e-08	1.23e-08	1.27e-08	1.7e-05	-12.781	0.6379	0.39978
Erythrose	0.00401315	0.00327615	0.00372921	1.23e-08	0.00142537	1.26e-08	5.04392	0.786895	1.0171
Ethanolamine	0.39595	0.395807	0.478339	0.423065	0.167622	0.117499	1.44074	0.692647	0.93659
farnesol	3.67e-08	2.85e-08	3.04e-08	0.00131767	0.00126244	1.26e-08	-25.1641	0.610873	0.90042
Fluorene	3.67e-08	2.85e-08	3.04e-08	1.23e-08	1.27e-08	1.26e-08	2.30152	0.00098597	1.3446
fructose	5.12226	1.70947	1.19164	0.366494	0.280764	0.0620517	5.98292	0.802141	1.1828
Fructose 2,6-biphosphate degr prod	1.09996	0.966067	1.04615	0.584843	0.570406	0.719457	1.25011	0.011514	1.2966
fructose-6-phosphate	0.112499	0.0552061	0.0479909	0.0315612	0.0101388	0.00434387	3.80866	0.768184	1.113
fumaric acid	0.399562	0.186564	0.234681	0.0486537	0.0374419	0.032024	4.78113	0.0060503	1.3158
Galactinol	3.67e-08	2.85e-08	3.04e-08	1.23e-08	1.27e-08	1.26e-08	2.30152	0.00098597	1.3446
Galactonic acid	3.67e-08	2.85e-08	3.04e-08	1.23e-08	1.27e-08	1.26e-08	2.30152	0.00098597	1.3446
galactose	3.67e-08	2.85e-08	3.04e-08	1.23e-08	1.27e-08	1.26e-08	2.30152	0.00098597	1.3446
Gentiobiose	3.67e-08	2.85e-08	3.04e-08	1.23e-08	1.27e-08	1.26e-08	2.30152	0.00098597	1.3446
Glucoheptonic acid	3.67e-08	2.85e-08	0.0519019	0.0317393	0.0240591	0.0113135	-0.633849	0.578558	0.91201
gluconic acid	0.0728908	0.0482237	0.0297208	0.0126878	0.00472648	0.00715494	4.47559	0.028137	1.2557
Glucosaminic acid	0.00527378	0.002402	3.04e-08	1.23e-08	1.27e-08	1.26e-08	30.1544	0.837344	1.0132
glucose	0.395102	2.85e-08	0.11939	1.23e-08	0.110267	0.109353	2.09947	0.719674	0.066488
Glucose-1-phosphate	0.00818418	2.85e-08	3.04e-08	1.23e-08	1.27e-08	1.26e-08	30.3127	0.832116	0.70283
glucose-6-phosphate	0.66568	2.85e-08	3.04e-08	1.23e-08	1.27e-08	1.26e-08	41.1609	0.728863	0.67974
glutamic acid	0.221107	0.176223	0.121369	1.23e-08	1.27e-08	0.0688528	4.98035	0.785509	1.0023
glutamine	0.0824913	0.0461029	0.0469276	1.23e-08	1.27e-08	1.26e-08	37.8732	3.5394e-06	1.3624
glutaraldehyde	0.105179	0.117647	0.108769	0.135868	0.0977955	0.0635491	0.269978	0.577251	0.4493
Glutaric Acid	3.67e-08	2.85e-08	0.0715467	0.0357917	1.27e-08	1.26e-08	1.70828	0.706507	0.083765
glycerol	3.67e-08	2.85e-08	3.04e-08	1.23e-08	1.27e-08	1.26e-08	2.30152	0.00098597	1.3446
glycine	2.14759	1.61527	1.76942	0.230701	0.236417	0.171964	5.32308	0.00082029	1.3527
glycocyamine	0.00660323	0.00864086	0.00669527	1.23e-08	1.27e-08	0.00478134	3.75754	0.767491	0.98618
glycolic acid	0.121424	0.0621311	0.0772037	0.112388	0.121071	0.0741498	-0.407517	0.574637	0.46965
guaiacol	3.67e-08	0.0012943	0.00108923	0.000844758	0.000791499	0.000530835	0.234827	0.57333	0.53295
Guanidinosuccinic acid	3.67e-08	2.85e-08	3.04e-08	1.23e-08	1.27e-08	1.26e-08	2.30152	0.00098597	1.3446
guanine	3.67e-08	2.85e-08	3.04e-08	1.23e-08	1.27e-08	1.26e-08	2.30152	0.00098597	1.3446
guanosine	0.00319489	0.0027677	0.00220012	0.000846859	1.27e-08	1.26e-08	5.58807	0.795211	1.0305
heptadecanoic acid	0.0335699	0.0319389	0.0273785	1.23e-08	1.27e-08	0.0170595	4.17959	0.7765	0.99255
Hesperitin	3.67e-08	2.85e-08	3.04e-08	1.23e-08	1.27e-08	1.26e-08	2.30152	0.00098597	1.3446
hexadecane	3.67e-08	2.85e-08	3.04e-08	1.23e-08	1.27e-08	1.26e-08	2.30152	0.00098597	1.3446
Hydantoin, 5-(4-hydroxybutyl)- 2	3.67e-08	0.00138803	0.00184346	1.23e-08	1.27e-08	1.26e-08	28.0208	0.572023	0.4875
hydroxylamine	0.00561139	0.0036252	0.00247507	1.23e-08	1.27e-08	1.26e-08	31.1965	1.1512e-05	1.3619
hydroxyurea	0.210841	2.85e-08	3.04e-08	0.0730538	0.10104	1.26e-08	0.472317	0.570716	0.3854
hypoxanthine	0.889808	0.843118	0.708058	0.173605	0.0925585	0.0212821	5.27573	0.791746	1.2136
indole-3-acetamide	3.67e-08	2.85e-08	3.04e-08	1.23e-08	1.27e-08	1.26e-08	2.30152	0.00098597	1.3446
inosine	1.0014	0.956992	0.751005	0.495821	0.36679	0.0346645	2.72557	0.735613	0.92998
inosine 5'-monophosphate	3.67e-08	2.85e-08	3.04e-08	1.23e-08	1.27e-08	1.26e-08	2.30152	0.00098597	1.3446
isocitric acid	0.0292497	2.85e-08	3.04e-08	1.23e-08	1.27e-08	1.26e-08	33.4539	0.774608	0.69472
Isoleucine	0.726444	0.754789	0.789898	0.470574	0.235597	0.173805	2.3384	0.725911	1.184
Isomaltose	3.67e-08	2.85e-08	3.04e-08	0.000290755	1.27e-08	0.000336547	-21.6763	0.631663	0.8912
Itaconic acid	0.0105914	0.00844642	0.010051	0.0168843	0.00793148	0.00488182	-0.0510766	0.569409	0.19499
Lactamide	3.67e-08	2.85e-08	3.04e-08	0.00585864	1.27e-08	0.00417749	-28.5142	0.573451	0.90793
lactic acid	1.1314	0.711143	0.803876	1.23e-08	0.546415	0.576381	2.11458	0.720367	0.64441
Lactobionic Acid	0.019451	0.00996147	0.00110895	1.23e-08	0.000866959	0.00373246	4.66747	0.781351	0.72919
L-Allothreonine	0.560887	0.619183	0.660383	0.146306	0.0802291	0.0940778	4.30994	0.0023862	1.334
lauric acid	0.0170869	0.0197985	0.0198646	0.00682596	0.0069281	0.00170703	3.207	0.753631	1.1511
L-cysteine	0.175385	0.204805	0.194838	0.0490119	0.0360018	0.0228274	4.12801	0.0055989	1.3178
L-dopa	0.406626	0.1001	0.0608921	0.0618802	0.0467752	0.0103499	3.85306	0.768877	0.92597
Leucrose	3.67e-08	2.85e-08	3.04e-08	1.23e-08	1.27e-08	1.26e-08	2.30152	0.00098597	1.3446
L-glutamic acid	3.67e-08	0.0361935	3.04e-08	1.23e-08	1.27e-08	1.26e-08	33.9792	0.766766	0.70593
L-Gulonolactone	0.050265	0.00318999	0.00312144	0.0228376	0.0122189	0.0111743	0.498067	0.568102	0.41657
Lignoceric acid	0.00679243	0.00458494	3.04e-08	0.00187685	1.27e-08	0.000603082	3.75717	0.766798	0.1702
linoleic acid	0.123385	2.85e-08	0.143727	0.12659	0.0826749	0.039967	0.170873	0.566795	0.55165
Linoleic acid methyl ester	0.457708	0.397362	0.325802	0.0789346	0.0163199	0.00432479	6.09938	0.80422	1.1957
linolenic acid	3.67e-08	0.000192379	3.04e-08	1.23e-08	1.27e-08	0.155065	-16.5039	0.637207	0.17296
L-Malic acid	3.67e-08	2.40807	2.66542	0.652034	0.480388	0.375244	2.99275	0.747394	0.46536
Loganin	3.67e-08	0.0057697	3.04e-08	0.00236187	1.27e-08	1.26e-08	2.20287	0.723139	0.11237
L-Threose	0.0817177	0.0439177	0.0435618	0.0066122	0.00386833	0.00165	6.49954	0.012594	1.2934
lysine	0.492193	0.182417	0.293515	0.0637098	0.0470383	0.049082	4.44242	0.014986	1.2867
Maleamate	0.00306065	0.00180831	0.00184017	0.00544256	0.00464203	0.00402842	-1.83399	0.047875	1.2172
maleic acid	0.0722896	0.01726	0.0184364	0.02803	0.0178781	0.0137301	1.46428	0.696112	0.49903
Maleimide	0.00342553	0.00403091	0.00434123	1.23e-08	1.27e-08	1.26e-08	31.2146	7.9525e-07	1.3627
malonic acid	0.176104	0.140748	0.156125	0.0681304	0.0618055	0.0501822	2.38103	0.003361	1.3284
maltitol	3.67e-08	2.85e-08	3.04e-08	1.23e-08	1.27e-08	1.26e-08	2.30152	0.00098597	1.3446
maltose	3.67e-08	2.85e-08	3.04e-08	0.537226	0.244307	0.133104	-39.6431	3.4163e-05	1.361
mannitol	3.67e-08	2.85e-08	3.04e-08	1.23e-08	1.27e-08	1.26e-08	2.30152	0.00098597	1.3446
Menthone	3.67e-08	2.85e-08	3.04e-08	1.23e-08	1.27e-08	1.26e-08	2.30152	0.00098597	1.3446
methionine	0.573168	0.575716	0.509945	1.23e-08	1.27e-08	1.26e-08	43.4128	1.7726e-07	1.3628
Methyl Palmitoleate	3.67e-08	2.85e-08	3.04e-08	1.23e-08	0.0134259	1.26e-08	-29.2319	0.565135	0.50536
Methyl Phosphate	2.45153	0.988322	1.36933	0.468146	0.201426	0.217327	4.16943	0.033024	1.2445
Methyl yellow	3.67e-08	2.85e-08	3.04e-08	0.00302795	0.00271261	0.00247511	-28.0207	1.2739e-06	1.3626
Methylmalonic acid	3.67e-08	2.85e-08	0.0107875	1.23e-08	0.0166366	0.01322	-2.51074	0.651067	0.42413
Monoolein	3.67e-08	2.85e-08	3.04e-08	2.86e-05	8.39e-05	2.33e-05	-17.9023	0.00063073	1.3541
Monostearin	3.67e-08	0.00990265	0.01046	0.00424801	0.00252658	1.26e-08	2.71419	0.734227	0.12791
myo-inositol	1.85065	0.883156	0.888241	0.723395	0.423015	0.230067	2.38619	0.728683	1.0553
Myristic Acid	0.120056	0.127348	0.104474	0.0756248	0.0749658	0.0428735	1.47529	0.696805	1.1547
N(epsilon)-Trimethyllysine	0.0767455	0.0955299	0.029317	1.23e-08	0.00782047	0.0115634	5.7756	0.562874	0.4245
N-Acetyl-L-glutamic acid	0.0516422	0.0663294	0.0970993	1.23e-08	1.27e-08	1.26e-08	38.3744	2.9967e-06	1.3624
N-Acetyl-L-leucine	0.0794207	0.084481	0.122922	0.0382156	0.0274044	0.0165494	3.08306	0.030552	1.2505
N-Acetyltryptophan	3.67e-08	2.85e-08	3.04e-08	1.23e-08	1.27e-08	1.26e-08	2.30152	0.00098597	1.3446
Neohesperidin	3.67e-08	2.85e-08	3.04e-08	1.23e-08	1.27e-08	1.26e-08	2.30152	0.00098597	1.3446
N-epsilon-Acetyl-L-lysine	0.0220533	2.85e-08	3.04e-08	1.23e-08	1.27e-08	1.26e-08	32.7573	0.78245	0.69639
N-Ethylglycine	3.67e-08	0.00113654	0.0011914	0.00105039	0.00148059	0.00127656	-1.21339	0.675322	0.62007
N-ethylmaleamic acid	0.0293518	0.00513463	0.00391403	0.00665303	1.27e-08	0.00176482	3.74315	0.766105	0.69951
Nicotianamine	3.67e-08	2.85e-08	3.04e-08	1.23e-08	1.27e-08	1.26e-08	2.30152	0.00098597	1.3446
nicotinamide	3.67e-08	2.85e-08	2.1969	0.706866	1.27e-08	0.261078	2.0215	0.718981	0.36308
N-Methyl-DL-alanine	0.180318	0.231449	0.367338	0.240768	0.208579	0.0714678	0.993311	0.561567	0.66113
N-Methyl-L-glutamic acid	3.67e-08	0.0113472	3.04e-08	1.23e-08	1.27e-08	1.26e-08	31.1186	0.816432	0.71407
noradrenaline	3.67e-08	2.85e-08	0.0152125	1.23e-08	1.27e-08	1.26e-08	31.8415	0.798134	0.70848
norvaline	0.773704	0.933942	0.966641	0.463308	0.615422	0.362171	1.52522	0.70027	1.2054
O-acetylserine	0.0693213	2.85e-08	3.04e-08	1.23e-08	0.00634939	1.26e-08	5.89548	0.800755	0.14134
o-cresol	0.0960841	0.0695602	0.0725954	0.0729634	0.0588424	0.0498227	0.669143	0.558953	0.91773
Octadecanol	0.0335699	2.85e-08	3.04e-08	1.23e-08	1.27e-08	1.26e-08	33.7936	0.770687	0.69393
oleic acid	3.67e-08	2.85e-08	3.04e-08	1.23e-08	1.27e-08	1.26e-08	2.30152	0.00098597	1.3446
O-phosphonothreonine	3.67e-08	0.00381437	0.00383669	1.23e-08	1.27e-08	1.26e-08	30.1465	0.838651	1.0242
O-Phosphorylethanolamine	0.492573	0.674953	0.667199	0.151283	0.133765	0.0710992	4.04303	0.0092928	1.3037
ornithine	0.249375	0.357714	0.572871	0.0572751	0.0320193	0.0231975	5.79662	0.0091482	1.3044
oxalic acid	0.0458323	0.0364128	0.0375219	0.0434061	0.0499745	0.0381064	-0.230254	0.557646	0.5431
oxamic acid	0.0291471	0.0159653	0.0246464	0.0298852	0.0365752	0.0317085	-0.842604	0.851	0.95123
oxamide	3.67e-08	2.85e-08	3.04e-08	1.23e-08	1.27e-08	1.26e-08	2.30152	0.00098597	1.3446
oxoproline	3.67e-08	2.85e-08	0.00414674	0.00475363	1.27e-08	1.26e-08	-0.33684	0.8509	0.067895
palatinitol	0.251098	0.067898	0.0675406	0.00753105	1.27e-08	0.00308203	8.86672	0.809764	0.88487
Palatinose	0.534759	0.46871	0.617152	0.0320363	0.00949934	0.00897249	8.55418	0.0034958	1.3277
palmitic acid	2.53471	1.44682	1.31287	1.2888	1.70512	1.16097	0.59774	0.8508	0.55976
palmitoleic acid	0.315779	0.294048	0.207087	0.436881	0.32589	1.26e-08	0.169128	0.8507	0.57968
pantothenic acid	0.0115218	0.00479544	0.00368676	1.23e-08	0.00226185	0.000980097	4.48809	0.780658	0.76033
p-cresol	0.0026945	0.00200718	0.00175717	1.23e-08	0.00197509	1.26e-08	2.92213	0.743236	0.96762
Pelargonic acid	0.00216666	0.00197389	0.00224351	0.00110006	0.00163779	0.00128268	1.14045	0.685024	1.2119
phenylacetaldehyde	0.0263638	0.0191537	3.04e-08	1.23e-08	1.27e-08	1.26e-08	34.5446	0.75631	1.0075
phenylalanine	0.381767	0.538122	0.474101	0.108874	0.0760866	0.0501855	4.38933	0.0060503	1.3158
Phenylphosphoric acid	0.587489	0.532043	0.58211	0.299922	0.2453	0.164734	2.15588	0.023016	1.267
phloroglucinol	3.67e-08	2.85e-08	3.04e-08	1.23e-08	1.27e-08	1.26e-08	2.30152	0.00098597	1.3446
phosphate	3.67e-08	2.85e-08	3.04e-08	0.0146748	1.27e-08	0.0123908	-30.961	0.556819	0.91236
Phytanic acid	3.67e-08	2.85e-08	3.04e-08	1.23e-08	1.27e-08	1.26e-08	2.30152	0.00098597	1.3446
Phytol	0.0193624	0.0177295	0.0199812	0.00704299	1.27e-08	1.26e-08	5.16024	0.788281	1.0135
phytosphingosine	3.67e-08	0.00317863	0.00396607	0.00281755	0.0100304	0.00165332	-1.74578	0.662155	0.60652
piceatannol	3.67e-08	2.85e-08	3.04e-08	0.00194414	0.00602136	0.00465118	-29.0786	5.6192e-05	1.3604
picolinic acid	0.00584146	0.00393187	0.00496987	0.0108852	0.00471347	1.26e-08	-0.139116	0.8506	0.56445
proline	1.493	1.53181	1.50087	1.23e-08	0.644382	0.565549	3.25353	0.75571	0.68161
pyrophosphate	0.0163144	0.00606916	0.00790089	0.000883031	0.0017652	0.0021654	4.53598	0.032281	1.2464
Pyrrole-2-Carboxylic Acid	3.67e-08	2.85e-08	3.04e-08	1.23e-08	1.27e-08	1.26e-08	2.30152	0.00098597	1.3446
Pyruvic acid	0.0646688	0.0306612	0.0363097	0.0277567	0.02793	0.0245396	1.22142	0.687103	0.94645
quinic acid	3.67e-08	2.85e-08	3.04e-08	1.23e-08	1.27e-08	1.26e-08	2.30152	0.00098597	1.3446
resorcinol	3.67e-08	2.85e-08	3.04e-08	0.0116265	0.00912866	1.26e-08	-30.3063	0.559591	0.91078
ribitol	3.329	2.85e-08	2.47336	3.06168	3.01848	2.91872	-1.08229	0.680173	0.61292
ribose	3.67e-08	2.85e-08	0.181219	0.0746871	0.0680418	0.0347109	0.0519757	0.8503	0.90361
saccharopine	3.67e-08	2.85e-08	3.04e-08	1.23e-08	1.27e-08	1.26e-08	2.30152	0.00098597	1.3446
salicin	3.67e-08	0.00881951	0.0116382	1.23e-08	1.27e-08	1.26e-08	32.5721	0.790292	1.0199
sarcosine	0.126258	0.127102	0.270078	0.0286578	0.0547099	0.0393437	3.57758	0.032371	1.2461
serine	1.44286	1.35303	1.48459	0.162051	0.120582	0.129995	5.76943	0.00015743	1.3586
shikimic acid	3.67e-08	2.85e-08	3.04e-08	1.23e-08	1.27e-08	1.26e-08	2.30152	0.00098597	1.3446
Sinapyl alcohol	0.000203647	2.85e-08	3.04e-08	1.23e-08	1.27e-08	1.26e-08	21.2039	0.813229	0.7383
Sophorose	0.0828946	0.0159932	0.0371576	0.00673333	0.00584561	0.000174993	5.83812	0.800062	1.0289
sorbitol	0.86296	0.235547	0.258345	0.246327	0.24177	0.202269	1.66647	0.704428	0.6839
spermidine	3.67e-08	0.00181575	0.00417287	1.23e-08	1.27e-08	1.26e-08	29.5423	0.844414	1.0249
squalene	0.377252	0.263384	0.360653	0.0987956	0.112865	0.049152	3.31777	0.024446	1.2636
stearic acid	1.78759	2.24905	2.04635	3.58979	2.74466	3.30919	-1.13647	0.034375	1.2419
sucrose	3.67e-08	2.85e-08	3.04e-08	1.23e-08	1.27e-08	1.26e-08	2.30152	0.00098597	1.3446
Sucrose-6-Phosphate	0.0333053	0.0172355	0.0156131	0.00899642	0.00383887	0.00257438	3.59337	0.76264	1.1835
sulfuric acid	0.153604	0.115792	0.124595	0.0334609	0.0408112	0.0408846	3.0336	0.0012409	1.3423
Synephrine	3.67e-08	2.85e-08	3.04e-08	0.000799767	0.000749314	0.000711105	-24.8376	1.2544e-06	1.3626
taurine	1.59455	0.986517	0.998259	1.23e-08	0.685164	0.275771	3.24322	0.754324	0.68734
terephthalic acid	3.67e-08	2.85e-08	3.04e-08	0.00267184	0.00302985	0.00119883	-27.5904	4.0312e-05	1.3608
testosterone	3.67e-08	2.85e-08	0.0112111	0.00284079	0.00236472	0.0022663	1.00082	0.682252	0.86558
Threitol	3.67e-08	2.85e-08	0.00527609	1.23e-08	0.00637018	0.00441477	-1.76332	0.661462	0.40649
Threonic acid	0.0618917	0.0519698	0.046826	0.0207263	0.0131	0.00725358	3.36391	0.030835	1.2496
threonine	0.00317995	0.00364285	0.00404934	0.0053821	1.27e-08	1.26e-08	1.73405	0.708586	0.94047
thymidine	1.87552	1.13807	1.29524	1.23e-08	1.27e-08	1.26e-08	45.7671	1.2466e-06	1.3626
thymine	0.0328139	0.0177551	0.0172134	0.0213884	0.0157215	1.26e-08	1.48571	0.698191	0.62544
Thymol	0.00442487	2.85e-08	0.00350787	1.23e-08	1.27e-08	1.26e-08	30.2357	0.83473	1.0099
toluenesulfonic acid	0.022914	0.0199513	0.0191607	0.01463	0.00817292	0.00613194	1.88052	0.71413	1.1518
trans-3,5-Dimethoxy-4-hydroxycinnamaldehyde	0.00339766	2.85e-08	3.04e-08	1.23e-08	1.27e-08	1.26e-08	28.1445	0.829168	0.70938
trehalose-6-phosphate	3.67e-08	2.85e-08	3.04e-08	1.23e-08	1.27e-08	1.26e-08	2.30152	0.00098597	1.3446
Tricetin	3.67e-08	2.85e-08	0.00986575	1.23e-08	1.27e-08	1.26e-08	30.7735	0.822967	0.71163
tryptophan	3.67e-08	2.85e-08	3.04e-08	1.23e-08	1.27e-08	1.26e-08	2.30152	0.00098597	1.3446
tyrosine	1.20291	0.554609	0.556753	0.201467	0.103863	0.0673745	4.50363	0.032043	1.247
uracil	0.110528	0.118338	0.115355	0.0410594	0.0102538	0.011042	4.21351	0.038299	1.2343
uric acid	0.00954658	0.0811871	0.00784223	0.0188223	0.0065001	0.00541069	2.87446	0.028299	1.54697
uridine	3.67e-08	0.00353613	0.00239256	0.00203771	1.27e-08	0.00182705	1.05528	0.682945	0.077883
valine	1.7663	1.78788	2.01868	0.584511	0.425608	0.300276	3.57017	0.0057617	1.3171
xanthine	0.532593	0.217641	0.175638	0.172087	0.0841846	0.0239567	2.94756	0.745315	0.97053
xylitol	3.67e-08	2.85e-08	0.0405553	1.23e-08	1.27e-08	1.26e-08	34.2599	0.757617	0.70201
xylose	0.0551955	0.0372097	0.0414747	0.0069937	1.27e-08	1.26e-08	7.28037	0.808378	1.0499
Zymosterol	3.67e-08	0.0110855	0.0147589	1.23e-08	1.27e-08	1.26e-08	33.1486	0.779836	1.0189
