# Supplementary material for: Functions of 1,25-dihydroxy vitamin D3, vitamin D3 receptor and interleukin-22 involved in pathogenesis of gout arthritis through altering metabolic pattern and inflammatory responses
Source: PeerJ journal article supplement (doi:10.7717/peerj.12585), 2021-12-01
Supplement: rawa.zip [file Pathway analysis.xlsx]

## Sheet: Sheet1
#term ID	term description	observed gene count	background gene count	false discovery rate	matching proteins in your network (IDs)	matching proteins in your network (labels)
hsa04919	Thyroid hormone signaling pathway	17	115	1.12e-24	ENSP00000251871,ENSP00000258648,ENSP00000262367,ENSP00000263253,ENSP00000269305,ENSP00000292035,ENSP00000297347,ENSP00000300651,ENSP00000323720,ENSP00000325612,ENSP00000354394,ENSP00000361066,ENSP00000363193,ENSP00000377686,ENSP00000380888,ENSP00000385216,ENSP00000437955	CREBBP,EP300,HIF1A,MED1,MED12,MED13,MED14,MED16,MED17,MED24,MED27,MED30,MED4,NCOA1,NCOA3,STAT1,TP53
hsa05161	Hepatitis B	8	142	5.66e-08	ENSP00000262367,ENSP00000263253,ENSP00000264657,ENSP00000269305,ENSP00000332973,ENSP00000354394,ENSP00000384273,ENSP00000387699	CREB1,CREBBP,EP300,RELA,SMAD3,STAT1,STAT3,TP53
hsa04630	Jak-STAT signaling pathway	8	160	9.28e-08	ENSP00000262367,ENSP00000263253,ENSP00000264657,ENSP00000270800,ENSP00000290200,ENSP00000296980,ENSP00000354394,ENSP00000442424	CREBBP,EP300,IL10RB,IL22,IL22RA1,IL22RA2,STAT1,STAT3
hsa05167	Kaposi's sarcoma-associated herpesvirus infection	8	183	1.91e-07	ENSP00000262367,ENSP00000263253,ENSP00000264657,ENSP00000269305,ENSP00000354394,ENSP00000384273,ENSP00000387699,ENSP00000437955	CREB1,CREBBP,EP300,HIF1A,RELA,STAT1,STAT3,TP53
hsa04659	Th17 cell differentiation	6	102	2.38e-06	ENSP00000264657,ENSP00000332973,ENSP00000354394,ENSP00000384273,ENSP00000437955,ENSP00000442424	HIF1A,IL22,RELA,SMAD3,STAT1,STAT3
hsa05152	Tuberculosis	7	172	2.38e-06	ENSP00000262367,ENSP00000263253,ENSP00000290200,ENSP00000354394,ENSP00000384273,ENSP00000387699,ENSP00000447173	CREB1,CREBBP,EP300,IL10RB,RELA,STAT1,VDR
hsa05200	Pathways in cancer	10	515	2.38e-06	ENSP00000262367,ENSP00000263253,ENSP00000264657,ENSP00000269305,ENSP00000332973,ENSP00000354394,ENSP00000361066,ENSP00000384273,ENSP00000385216,ENSP00000437955	CREBBP,EP300,HIF1A,NCOA1,NCOA3,RELA,SMAD3,STAT1,STAT3,TP53
hsa05321	Inflammatory bowel disease (IBD)	5	62	4.75e-06	ENSP00000264657,ENSP00000332973,ENSP00000354394,ENSP00000384273,ENSP00000442424	IL22,RELA,SMAD3,STAT1,STAT3
hsa05212	Pancreatic cancer	5	74	9.66e-06	ENSP00000264657,ENSP00000269305,ENSP00000332973,ENSP00000354394,ENSP00000384273	RELA,SMAD3,STAT1,STAT3,TP53
hsa04066	HIF-1 signaling pathway	5	98	3.1e-05	ENSP00000262367,ENSP00000263253,ENSP00000264657,ENSP00000384273,ENSP00000437955	CREBBP,EP300,HIF1A,RELA,STAT3
hsa05168	Herpes simplex infection	6	181	3.1e-05	ENSP00000262367,ENSP00000263253,ENSP00000269305,ENSP00000290663,ENSP00000354394,ENSP00000384273	CREBBP,EP300,MED8,RELA,STAT1,TP53
hsa05203	Viral carcinogenesis	6	183	3.1e-05	ENSP00000262367,ENSP00000263253,ENSP00000264657,ENSP00000269305,ENSP00000384273,ENSP00000387699	CREB1,CREBBP,EP300,RELA,STAT3,TP53
hsa05215	Prostate cancer	5	97	3.1e-05	ENSP00000262367,ENSP00000263253,ENSP00000269305,ENSP00000384273,ENSP00000387699	CREB1,CREBBP,EP300,RELA,TP53
hsa05169	Epstein-Barr virus infection	6	194	3.55e-05	ENSP00000262367,ENSP00000263253,ENSP00000264657,ENSP00000269305,ENSP00000290200,ENSP00000384273	CREBBP,EP300,IL10RB,RELA,STAT3,TP53
hsa04137	Mitophagy - animal	4	63	0.0001	ENSP00000269305,ENSP00000384273,ENSP00000437955,ENSP00000444198	CITED2,HIF1A,RELA,TP53
hsa05166	HTLV-I infection	6	250	0.00013	ENSP00000262367,ENSP00000263253,ENSP00000269305,ENSP00000332973,ENSP00000384273,ENSP00000387699	CREB1,CREBBP,EP300,RELA,SMAD3,TP53
hsa04350	TGF-beta signaling pathway	4	83	0.00026	ENSP00000262367,ENSP00000263253,ENSP00000287727,ENSP00000332973	CREBBP,EP300,SMAD3,ZFYVE9
hsa05165	Human papillomavirus infection	6	317	0.00041	ENSP00000262367,ENSP00000263253,ENSP00000269305,ENSP00000354394,ENSP00000384273,ENSP00000387699	CREB1,CREBBP,EP300,RELA,STAT1,TP53
hsa04933	AGE-RAGE signaling pathway in diabetic complications	4	98	0.00043	ENSP00000264657,ENSP00000332973,ENSP00000354394,ENSP00000384273	RELA,SMAD3,STAT1,STAT3
hsa05145	Toxoplasmosis	4	109	0.00061	ENSP00000264657,ENSP00000290200,ENSP00000354394,ENSP00000384273	IL10RB,RELA,STAT1,STAT3
hsa04110	Cell cycle	4	123	0.00091	ENSP00000262367,ENSP00000263253,ENSP00000269305,ENSP00000332973	CREBBP,EP300,SMAD3,TP53
hsa04068	FoxO signaling pathway	4	130	0.0011	ENSP00000262367,ENSP00000263253,ENSP00000264657,ENSP00000332973	CREBBP,EP300,SMAD3,STAT3
hsa05160	Hepatitis C	4	131	0.0011	ENSP00000264657,ENSP00000269305,ENSP00000354394,ENSP00000384273	RELA,STAT1,STAT3,TP53
hsa05162	Measles	4	133	0.0011	ENSP00000264657,ENSP00000269305,ENSP00000354394,ENSP00000384273	RELA,STAT1,STAT3,TP53
hsa04310	Wnt signaling pathway	4	143	0.0013	ENSP00000262367,ENSP00000263253,ENSP00000269305,ENSP00000332973	CREBBP,EP300,SMAD3,TP53
hsa05206	MicroRNAs in cancer	4	149	0.0015	ENSP00000262367,ENSP00000263253,ENSP00000264657,ENSP00000269305	CREBBP,EP300,STAT3,TP53
hsa04520	Adherens junction	3	71	0.0022	ENSP00000262367,ENSP00000263253,ENSP00000332973	CREBBP,EP300,SMAD3
hsa04917	Prolactin signaling pathway	3	69	0.0022	ENSP00000264657,ENSP00000354394,ENSP00000384273	RELA,STAT1,STAT3
hsa05164	Influenza A	4	168	0.0022	ENSP00000262367,ENSP00000263253,ENSP00000354394,ENSP00000384273	CREBBP,EP300,RELA,STAT1
hsa05211	Renal cell carcinoma	3	68	0.0022	ENSP00000262367,ENSP00000263253,ENSP00000437955	CREBBP,EP300,HIF1A
hsa05220	Chronic myeloid leukemia	3	76	0.0026	ENSP00000269305,ENSP00000332973,ENSP00000384273	RELA,SMAD3,TP53
hsa04024	cAMP signaling pathway	4	195	0.0032	ENSP00000262367,ENSP00000263253,ENSP00000384273,ENSP00000387699	CREB1,CREBBP,EP300,RELA
hsa05016	Huntington's disease	4	193	0.0032	ENSP00000262367,ENSP00000263253,ENSP00000269305,ENSP00000387699	CREB1,CREBBP,EP300,TP53
hsa04211	Longevity regulating pathway	3	88	0.0035	ENSP00000269305,ENSP00000384273,ENSP00000387699	CREB1,RELA,TP53
hsa01522	Endocrine resistance	3	95	0.0042	ENSP00000269305,ENSP00000300651,ENSP00000361066	MED1,NCOA3,TP53
hsa04916	Melanogenesis	3	98	0.0045	ENSP00000262367,ENSP00000263253,ENSP00000387699	CREB1,CREBBP,EP300
hsa04922	Glucagon signaling pathway	3	100	0.0046	ENSP00000262367,ENSP00000263253,ENSP00000387699	CREB1,CREBBP,EP300
hsa04931	Insulin resistance	3	107	0.0054	ENSP00000264657,ENSP00000384273,ENSP00000387699	CREB1,RELA,STAT3
hsa04060	Cytokine-cytokine receptor interaction	4	263	0.0079	ENSP00000270800,ENSP00000290200,ENSP00000296980,ENSP00000442424	IL10RB,IL22,IL22RA1,IL22RA2
hsa04380	Osteoclast differentiation	3	124	0.0079	ENSP00000354394,ENSP00000384273,ENSP00000387699	CREB1,RELA,STAT1
hsa04926	Relaxin signaling pathway	3	130	0.0087	ENSP00000332973,ENSP00000384273,ENSP00000387699	CREB1,RELA,SMAD3
hsa04915	Estrogen signaling pathway	3	133	0.009	ENSP00000361066,ENSP00000385216,ENSP00000387699	CREB1,NCOA1,NCOA3
hsa05418	Fluid shear stress and atherosclerosis	3	133	0.009	ENSP00000269305,ENSP00000346389,ENSP00000384273	MEF2A,RELA,TP53
hsa05224	Breast cancer	3	147	0.0113	ENSP00000269305,ENSP00000361066,ENSP00000385216	NCOA1,NCOA3,TP53
hsa04218	Cellular senescence	3	156	0.013	ENSP00000269305,ENSP00000332973,ENSP00000384273	RELA,SMAD3,TP53
hsa04330	Notch signaling pathway	2	48	0.0137	ENSP00000262367,ENSP00000263253	CREBBP,EP300
hsa05030	Cocaine addiction	2	49	0.014	ENSP00000384273,ENSP00000387699	CREB1,RELA
hsa04062	Chemokine signaling pathway	3	181	0.0183	ENSP00000264657,ENSP00000354394,ENSP00000384273	RELA,STAT1,STAT3
hsa04720	Long-term potentiation	2	64	0.0219	ENSP00000262367,ENSP00000263253	CREBBP,EP300
hsa05205	Proteoglycans in cancer	3	195	0.0219	ENSP00000264657,ENSP00000269305,ENSP00000437955	HIF1A,STAT3,TP53
hsa05230	Central carbon metabolism in cancer	2	65	0.0219	ENSP00000269305,ENSP00000437955	HIF1A,TP53
hsa05221	Acute myeloid leukemia	2	66	0.0221	ENSP00000264657,ENSP00000384273	RELA,STAT3
hsa05223	Non-small cell lung cancer	2	66	0.0221	ENSP00000264657,ENSP00000269305	STAT3,TP53
hsa04920	Adipocytokine signaling pathway	2	69	0.0231	ENSP00000264657,ENSP00000384273	RELA,STAT3
hsa05140	Leishmaniasis	2	70	0.0233	ENSP00000354394,ENSP00000384273	RELA,STAT1
hsa05210	Colorectal cancer	2	85	0.0328	ENSP00000269305,ENSP00000332973	SMAD3,TP53
hsa04658	Th1 and Th2 cell differentiation	2	88	0.0344	ENSP00000354394,ENSP00000384273	RELA,STAT1
hsa05222	Small cell lung cancer	2	92	0.0367	ENSP00000269305,ENSP00000384273	RELA,TP53
hsa04620	Toll-like receptor signaling pathway	2	102	0.0428	ENSP00000354394,ENSP00000384273	RELA,STAT1
hsa05142	Chagas disease (American trypanosomiasis)	2	101	0.0428	ENSP00000332973,ENSP00000384273	RELA,SMAD3
hsa04668	TNF signaling pathway	2	108	0.0468	ENSP00000384273,ENSP00000387699	CREB1,RELA
