# Supplementary material for: Functions of 1,25-dihydroxy vitamin D3, vitamin D3 receptor and interleukin-22 involved in pathogenesis of gout arthritis through altering metabolic pattern and inflammatory responses
Source: PeerJ journal article supplement (doi:10.7717/peerj.12585), 2021-12-01
Supplement: rawa.zip [file PCR.xlsx]

## Sheet: Sheet1
groups	group by	Serial NO.	IL22	VD-R
AGA Patients	1	1	2.768	1.321
AGA Patients	1	2	3.579	0.978
AGA Patients	1	4	6.165	0.79
AGA Patients	1	5	3.675	0.992
AGA Patients	1	7	2.955	1.003
AGA Patients	1	10	4.766	0.652
AGA Patients	1	11	3.514	0.984
AGA Patients	1	12	3.88	0.53
AGA Patients	1	13	4.555	0.79
AGA Patients	1	14	4.484	0.816
AGA Patients	1	15	1.663	0.893
AGA Patients	1	16	11.811	0.476
AGA Patients	1	17	1.456	0.705
AGA Patients	1	18	16.464	0.572
AGA Patients	1	19	1.423	0.579
AGA Patients	1	20	5.275	0.612
AGA Patients	1	21	6.653	0.862
AGA Patients	1	22	2.981	0.545
AGA Patients	1	23	2.039	0.851
AGA Patients	1	24	2.89	0.729
AGA Patients	1	25	5.015	0.535
AGA Patients	1	26	3.262	0.427
AGA Patients	1	27	14.712	0.727
AGA Patients	1	28	2.148	0.658
AGA Patients	1	29	2.262	0.877
AGA Patients	1	30	4.995	0.582
AGA Patients	1	31	3.685	0.656
NAGA Patients	2	1	4.493	1.614
NAGA Patients	2	2	3.955	1.015
NAGA Patients	2	3	3.912	0.719
NAGA Patients	2	5	13.452	0.544
NAGA Patients	2	6	4.051	0.777
NAGA Patients	2	8	2.604	0.627
NAGA Patients	2	9	4.044	0.556
NAGA Patients	2	10	1.549	0.504
NAGA Patients	2	11	4.024	0.401
NAGA Patients	2	12	1.75	0.506
NAGA Patients	2	13	3.945	0.61
NAGA Patients	2	14	3.413	0.501
NAGA Patients	2	15	17.73	0.557
NAGA Patients	2	16	2.51	0.519
NAGA Patients	2	18	4.302	0.601
NAGA Patients	2	19	4.377	0.479
NAGA Patients	2	20	4.842	0.562
NAGA Patients	2	21	6.517	0.462
NAGA Patients	2	22	3.77	0.533
NAGA Patients	2	23	2.469	0.757
NAGA Patients	2	24	2.631	0.418
NAGA Patients	2	25	2.376	0.499
NAGA Patients	2	26	2.136	0.534
NAGA Patients	2	27	1.69	0.41
NAGA Patients	2	28	7.874	0.665
NAGA Patients	2	29	2.977	1.008
NAGA Patients	2	30	1.442	0.442
NAGA Patients	2	31	6.606	1.15
HC	3	1	1.678	1.518
HC	3	2	0.803	1.214
HC	3	3	0.832	1.227
HC	3	4	0.526	1.073
HC	3	5	1.586	0.713
HC	3	6	1.012	2.125
HC	3	7	1.101	0.932
HC	3	8	1.161	1.443
HC	3	9	1.359	1.14
HC	3	10	1.281	0.789
HC	3	11	0.741	0.889
HC	3	12	2.385	1.094
HC	3	13	0.433	0.862
HC	3	14	4.377	1.213
HC	3	15	0.454	0.936
HC	3	16	1.125	0.635
HC	3	17	2.45	0.706
HC	3	18	0.531	0.879
HC	3	19	5.7	1.012
HC	3	20	0.41	0.863
