# Supplementary figures and images for: Functions of 1,25-dihydroxy vitamin D3, vitamin D3 receptor and interleukin-22 involved in pathogenesis of gout arthritis through altering metabolic pattern and inflammatory responses
Source: PeerJ journal article supplement (doi:10.7717/peerj.12585), 2021-12-01

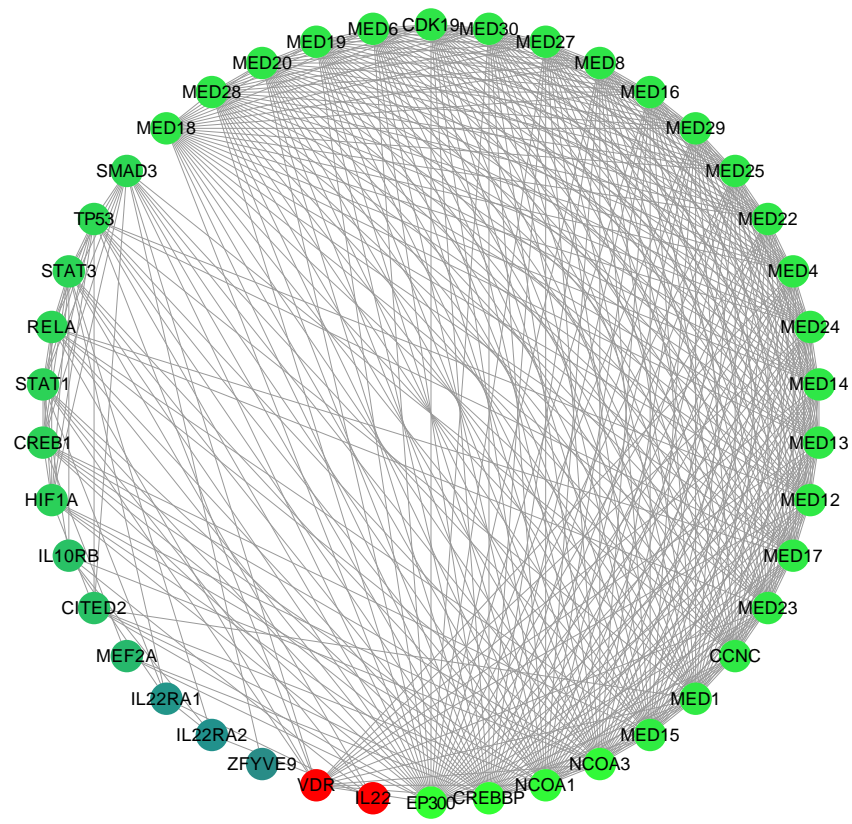

Supplement: rawa.zip [file string_interactions.tsv.pdf › network/string_interactions.tsv.pdf]
